# Supplementary material for: Lab-Scale Cultivation of Cupriavidus necator on Explosive Gas Mixtures: Carbon Dioxide Fixation into Polyhydroxybutyrate
Source: MDPI journal article supplement (doi:10.3390/bioengineering9050204), 2022-05-10
Supplement: s1 [file s1]

## Supplementary Information

### Lab-Scale Cultivation of *Cupriavidus necator* on Explosive Gas Mixtures: Carbon Dioxide Fixation into Polyhydroxyalkanoate

Vera Lambauer<sup>a,b</sup>, Regina Kratzer<sup>b,a</sup>

<sup>a</sup>Austrian Centre of Industrial Biotechnology (ACIB), 8010 Graz, Austria.

<sup>b</sup>Institute of Biotechnology and Biochemical Engineering, Graz University of Technology, NAWI Graz, 8010 Graz, Austria.

\*Corresponding author phone +43 316 873 8412, e-mail: regina.kratzer@tugraz.at

## Content

### 1. Optical density (OD<sub>600</sub>) cell-dry mass (CDM) correlation

Figure S1. Wavelength scan of water, TSB and mineral media.

Figure S2. Correlation of OD<sub>600</sub> to CDM in *C. necator* cultures.

### 2. Determination of the volumetric oxygen transfer coefficient (*k<sub>L</sub>a*)

Figure S3. Gassing and bubble formation in the stirred 1L DURAN® GLS 80 bioreactor. A magnetic anchor stirrer (reactor cap GLS 80) and an PTFE frit (Agilent) were used for stirring and gassing.

Figure S4. *k<sub>L</sub>a* values for the 1L DURAN® GLS 80 bioreactor at gas flows of 100, 200 and 400mL at 340rpm.

### 3. Effect of temperature on growth

Table S1. Maximal growth rates ( $\mu_{\max}$  h<sup>-1</sup>) obtained at room temperature or 30°C (mineral media, cultivation time 3 days).

Figure S5. Comparison of heterotrophic cultivations at room temperature (22 – 24°C) and at 30°C.

### 4. Chemoautotrophic cultivation (oxyhydrogen fermentation)

Figure S6. Determination of maximal growth rates from chemoautotrophic cultivations depicted in Figures 6, 7 (main part). Crosses show growth rates from cultivations with manual DO control guided by the O<sub>2</sub> sensor (light blue crosses constant and low H<sub>2</sub> and CO<sub>2</sub>, orange and yellow crosses increase in H<sub>2</sub> and CO<sub>2</sub> after ~60h). Blue diamonds from a cultivation with manual DO control guided by the biomass formation, grey triangles from a cultivation with constant gas composition.

Figure S7. Time curve of a gas fermentation with constant high O<sub>2</sub> supply. OD<sub>600</sub> values (black circles) and pO<sub>2</sub> (blue line).

Figure S8. Time curves of gas cultivations 1 (panel A) and 2 (panel B) with manual DO control using a dipping probe (supplementing Figure 7A main part). Panel B shows gas cultivation 2 with H<sub>2</sub> and CO<sub>2</sub> flows increased to 200 and 20NmL/min at 57h. (OD<sub>600</sub> values circles, pO<sub>2</sub> blue line, DO in % of saturation, blue dots, (NH<sub>4</sub>)<sub>2</sub>SO<sub>4</sub> white triangles).

## 1. Optical density (OD<sub>600</sub>) cell-dry mass (CDM) correlation

The wavelength for optical cell density measurements was set to 600nm according to wave length scans of pure media (Figure S1). The scan was performed on a Beckman DU-800 spectrophotometer. Cell dry mass (CDM) was determined gravimetrically. 5mL of the cell suspension were filled in a previously dried vial. 5mL of the media were transferred into a further vial and used as reference. All vials were dried at 105°C over night. After cooling down in a dessicator for at least 4-6 h, the cell dry mass was determined by substracting the mass of the cells with media from the mass of the media alone. OD<sub>600</sub> and CDM data were correlated (Figure S2) to facilitate fast CDM estimation during fermentations.

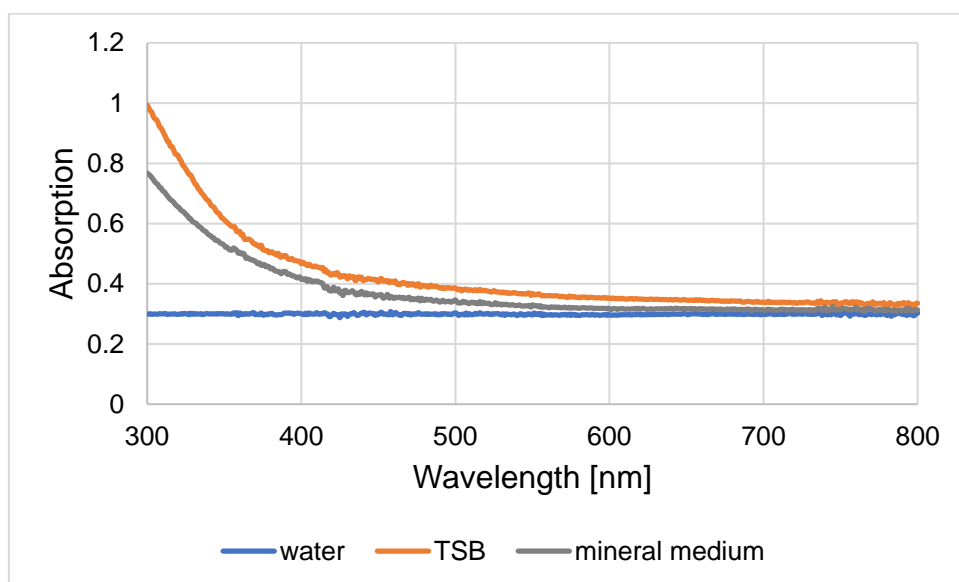

Figure S1. Wavelength scan of water, TSB and mineral media. The scan was performed on a Beckman DU-800 spectrophotometer.

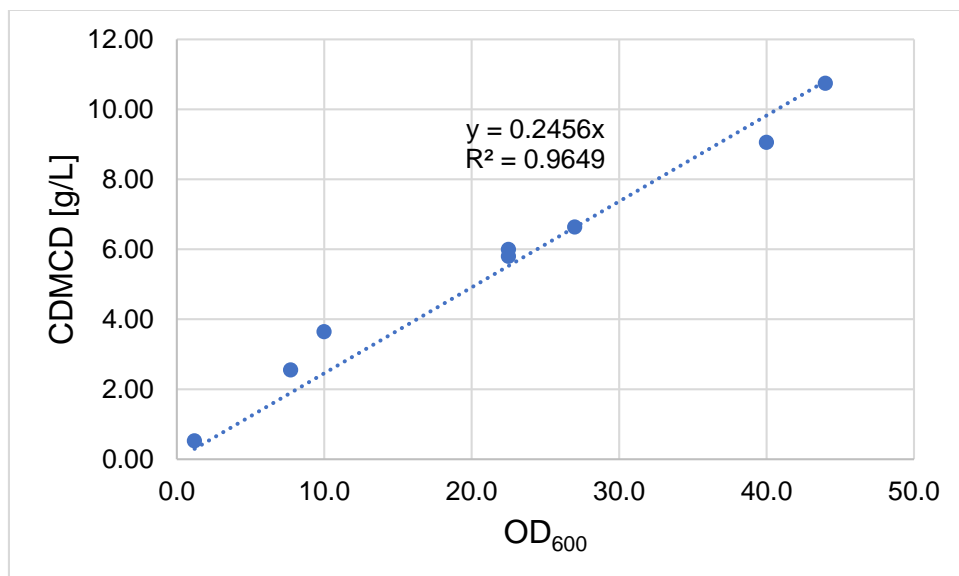

Figure S2. Correlation of OD<sub>600</sub> to CDM in *C. necator* cultures.

## 2. Determination of the volumetric oxygen transfer coefficient ( $k_La$ )

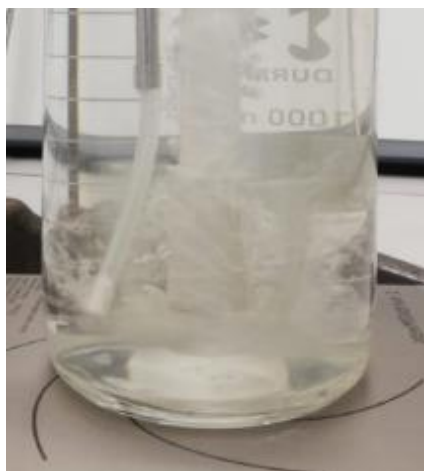

**Figure S3.** Gassing and bubble formation in the stirred 1000 mL DURAN® GLS 80 bioreactor. A magnetic anchor stirrer (reactor cap GLS 80) and an PTFE frit (Agilent) were used for stirring and gassing.

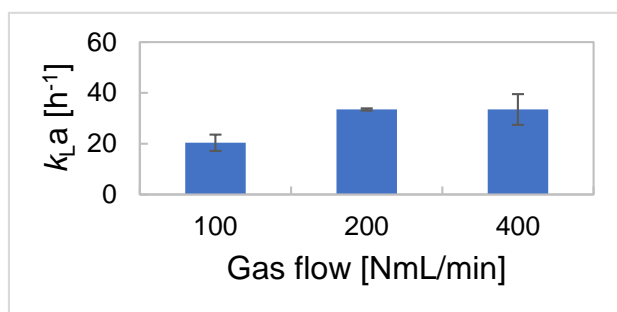

**Figure S4.**  $k_La$  values for the 1L DURAN® GLS 80 bioreactor at gas flows of 100, 200 and 400mL at 340rpm.

### 3. Optimization of growth conditions

#### 3.1 Effect of temperature on growth

*Table S1. Maximal growth rates ( $\mu_{\max}$  h<sup>-1</sup>) obtained at room temperature or 30°C (mineral media, cultivation time 3 days).*

| Cultivation flask<br>(stirring, shaking)                        | Temperature                   | $\mu_{\max}$ h <sup>-1</sup> * |
|-----------------------------------------------------------------|-------------------------------|--------------------------------|
| 1L baffled flask<br>(magnetic bar, 400rpm)                      | 30°C<br>(thermostatzed)       | 0.179 ± 0.014                  |
| 1L baffled flask<br>(magnetic bar, 400rpm)                      | 22-24°C<br>(room temperature) | 0.132 ± 0.006                  |
| 300mL baffled flask<br>(orbitally shaken, 110rpm)               | 30°C<br>(thermostatzed)       | 0.172 ± 0.007                  |
| 1 L DURAN® GLS 80 bottle<br>(magnetic anchor stirring, 400 rpm) | 22-24°C<br>(room temperature) | 0.120 ± 0.015                  |

\*Mean value and deviation from the mean of two independent cultivations.

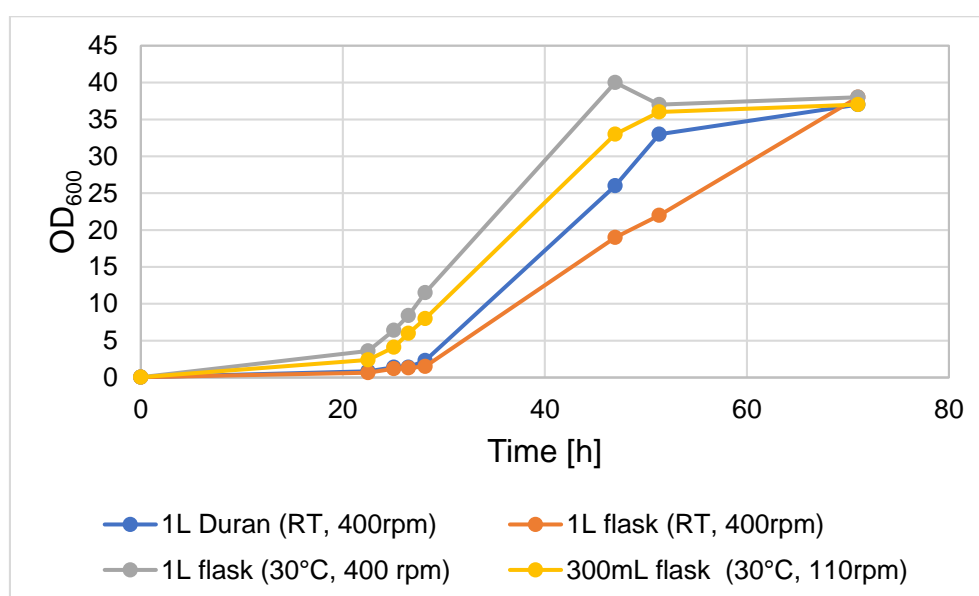

*Figure S5. Heterotrophic cultivations at room temperature (22 – 24°C, orange dots) and at 30°C (grey dots) in 1L baffled flasks (magnetic bar, stirring at 400rpm). Compared to cultivation at room temperature in the 1L DURAN® GLS 80 bottle (400 rpm) (blue dots) and cultivation at 30°C in 300mL shaken flask (orbitally shaken at 110rpm) (yellow dots).*

#### 4. Chemoautotrophic cultivation (oxyhydrogen fermentation)

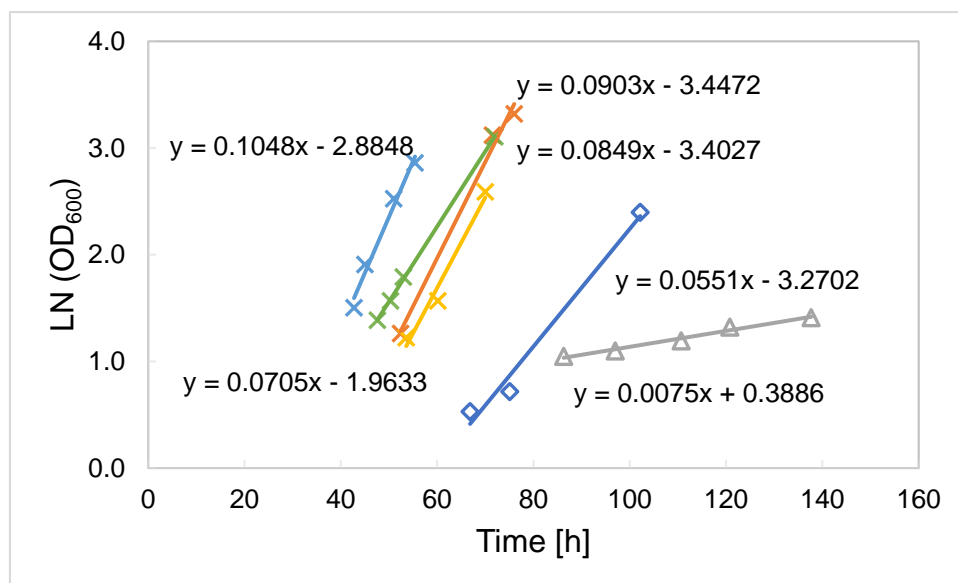

**Figure S6.** Determination of maximal growth rates from chemoautotrophic cultivations depicted in Figures 6, 7 (main part). Crosses show growth rates from cultivations with manual DO control guided by the O<sub>2</sub> sensor (light blue crosses gas cultivation 4, green crosses gas cultivation 1, orange crosses gas cultivation gas cultivation 2, yellow crosses gas cultivation 3; gas cultivations 2 and 3 increase in H<sub>2</sub> and CO<sub>2</sub> after ~60 h, gas cultivation 4 increase in H<sub>2</sub> and CO<sub>2</sub> after 45 h). Blue diamonds from a cultivation with manual DO control guided by the biomass formation, grey triangles from a cultivation with constant gas composition.

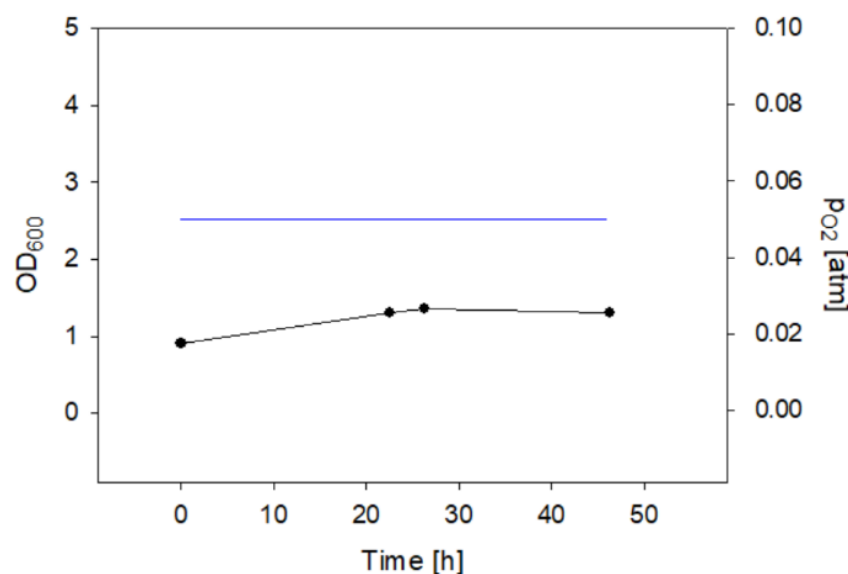

**Figure S7.** Time curve of a gas fermentation with constant high O<sub>2</sub> supply. OD<sub>600</sub> values (black circles) and pO<sub>2</sub> (blue line).

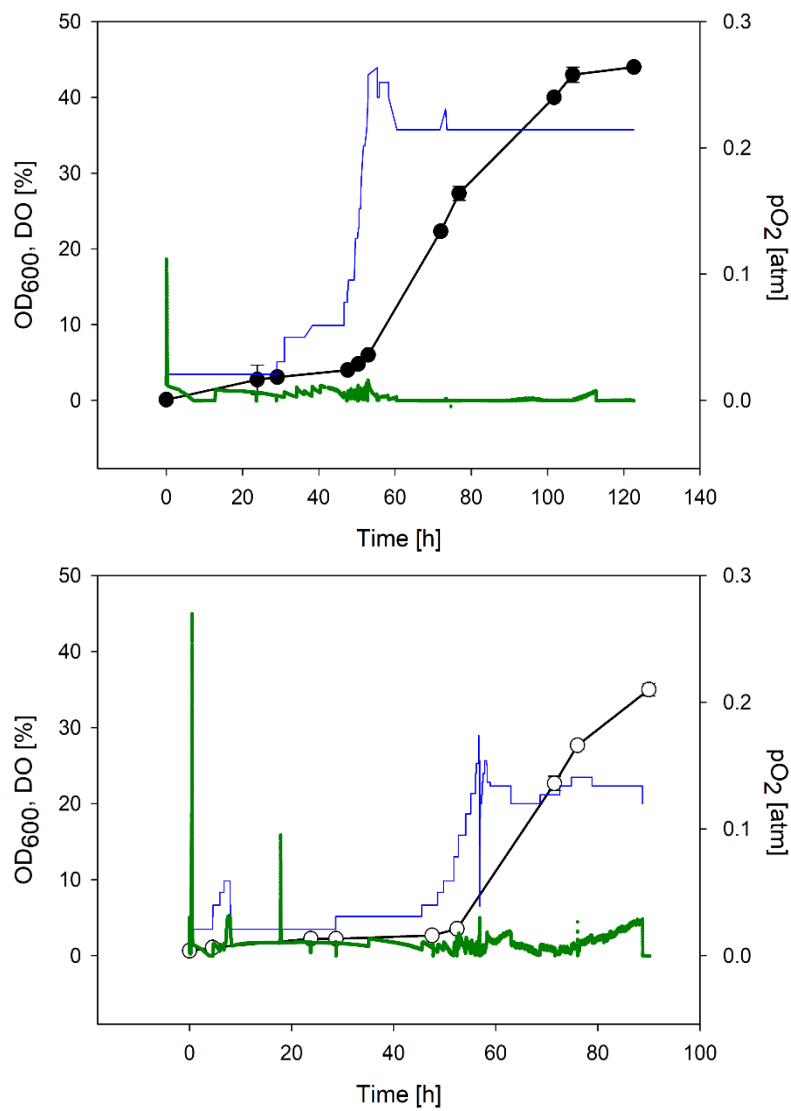

**Figure S8.** Time curves of gas cultivations 1 (panel A) and 2 (panel B) with manual DO control using a dipping probe (supplementing Figure 7A main part). Panel B shows gas cultivation 2 with H<sub>2</sub> and CO<sub>2</sub> flows increased to 200 and 20NmL/min at 57h. (OD<sub>600</sub> values circles, pO<sub>2</sub> blue line, DO in % of saturation blue dots seen as thick line.)
