# Supplementary material for: Lab-Scale Cultivation of Cupriavidus necator on Explosive Gas Mixtures: Carbon Dioxide Fixation into Polyhydroxybutyrate
Source: Bioengineering (Basel). 2022 May 10;9(5):204. doi: 10.3390/bioengineering9050204 (PMC9138072; doi:10.3390/bioengineering9050204)
Supplement: Supplementary file 1 [file bioengineering-09-00204-s001.zip › Supplementary Data.xlsx]

## Sheet: Gas cultivation 1
Ferm. Samples (internal # 11)					Manually adjusted gasflow					Hcp 1.18 mM/atm		Dissolved Oxygen readout (1 point per 11 minutes)
Time [h]	OD600	STD OD600	gcdw [g/L]		Time [h]	O2 [NmL/min]	CO2 [NmL/min]	H2 [NmL/min]	pO2 [atm]	O* at t [mM]		Time [h]	DO [% saturation]	DO [mM]
0	0.075	0	0.0181725		0	2	10	85	0.0206186	0.0243299		1.61503	1.66726	0.0196736
23.85	2.73333	0.1	0.662287		23.7117	2	10	85	0.0206186	0.0243299		2.0317	1.60306	0.0189161
29.1167	3.06667	0.0942809	0.743053		23.7117	2	10	85	0.0206186	0.0243299		2.44838	1.53331	0.0180931
47.5833	4	0.282843	0.9692		23.7136	2	10	85	0.0206186	0.0243299		2.86503	1.47031	0.0173497
50.3333	4.8	0	1.16304		28.9928	2	10	85	0.0206186	0.0243299		3.2817	1.39711	0.0164859
52.9833	6	0	1.4538		28.9928	2	10	85	0.0206186	0.0243299		3.69838	1.18761	0.0140138
71.9833	22.3333	0.471405	5.41137		28.9939	3	10	85	0.0306122	0.0361224		4.11504	1.07292	0.0126604
76.8333	27.3333	0.942809	6.62287		30.9697	3	10	85	0.0306122	0.0361224		4.53171	0.965934	0.011398
101.75	40	0	9.692		30.9817	5	10	85	0.05	0.059		4.94837	0.824177	0.00972529
106.617	43	1	10.4189		34.265	5	10	85	0.05	0.059		5.36504	0.69109	0.00815486
122.667	44	0	10.6612		36.25	5	10	85	0.05	0.059		5.78171	0.49356	0.00582401
					38.3167	6	10	85	0.0594059	0.070099		6.19837	0.365438	0.00431217
					40.4756	6	10	85	0.0594059	0.070099		6.61504	0.187071	0.00220744
					46.6237	6	10	85	0.0594059	0.070099		7.03171	-0.00601652	-7.0995e-05
					46.6286	8	10	85	0.0776699	0.0916505		7.44838	-0.0597005	-0.000704466
					46.6374	8	10	85	0.0776699	0.0916505		7.86504	-0.0570495	-0.000673184
					47.4667	8	10	85	0.0776699	0.0916505		8.28171	-0.058885	-0.000694843
					47.4667	9	10	85	0.0865385	0.102115		8.69837	-0.0587392	-0.000693123
					47.5262	9	10	85	0.0865385	0.102115		9.11504	-0.0554723	-0.000654573
					47.6444	9	10	85	0.0865385	0.102115		9.5317	-0.0538381	-0.00063529
					47.7572	10	10	85	0.0952381	0.112381		9.94837	-0.0526122	-0.000620823
					48.494	10	10	85	0.0952381	0.112381		10.365	-0.0530208	-0.000625646
					49.2816	10	10	85	0.0952381	0.112381		10.7817	-0.0530208	-0.000625646
					49.5857	14	10	85	0.12844	0.15156		11.1984	-0.0524078	-0.000618412
					50.1484	14	10	85	0.12844	0.15156		11.615	-0.0542467	-0.000640111
					50.3442	15	10	85	0.136364	0.160909		12.0317	-0.0538381	-0.00063529
					50.3442	15	10	85	0.136364	0.160909		12.4484	-0.0526122	-0.000620823
					50.4938	15	10	85	0.136364	0.160909		12.865	0.781564	0.00922246
					50.4966	17	10	85	0.151786	0.179107		13.2817	1.38549	0.0163488
					50.5214	17	10	85	0.151786	0.179107		13.6984	1.36564	0.0161146
					50.9537	17	10	85	0.151786	0.179107		14.115	1.36089	0.0160585
					51.1193	20	10	85	0.173913	0.205217		14.5317	1.32038	0.0155805
					51.6895	24	10	85	0.201681	0.237983		14.9484	1.30313	0.0153769
					52.0833	24	10	85	0.201681	0.237983		15.365	1.26769	0.0149587
					52.5447	26	10	85	0.214876	0.253554		15.7817	1.2496	0.0147453
					52.8999	30	10	85	0.24	0.2832		16.1984	1.24236	0.0146599
					52.8999	30	10	85	0.24	0.2832		16.615	1.23256	0.0145442
					52.9022	33	10	85	0.257812	0.304219		17.0317	1.22946	0.0145077
					55.3516	34	10	85	0.263566	0.311008		17.4484	1.21402	0.0143255
					55.3516	34	10	85	0.263566	0.311008		17.865	1.22681	0.0144764
					55.3613	30	10	85	0.24	0.2832		18.2817	1.2361	0.014586
					55.8803	30	10	85	0.24	0.2832		18.6984	1.23455	0.0145677
					55.8803	32	10	85	0.251969	0.297323		19.115	1.23197	0.0145373
					58.294	32	10	85	0.251969	0.297323		19.5317	1.23507	0.0145738
					58.294	30	10	85	0.24	0.2832		19.9484	1.21728	0.0143639
					60.5001	30	10	100	0.214286	0.252857		20.365	1.1783	0.013904
					60.5001	30	10	100	0.214286	0.252857		20.7817	1.14963	0.0135656
					71.7166	30	10	100	0.214286	0.252857		21.1984	1.1373	0.0134202
					71.7166	30	10	100	0.214286	0.252857		21.615	1.12327	0.0132546
					71.7746	30	10	100	0.214286	0.252857		22.0317	1.08772	0.0128351
					73.306	33	10	100	0.230769	0.272308		22.4484	1.07818	0.0127226
					73.306	33	10	100	0.230769	0.272308		22.865	1.04018	0.0122742
					73.6575	30	10	100	0.214286	0.252857		23.2817	1.03271	0.012186
					73.6575	30	10	100	0.214286	0.252857		23.6984	0.413556	0.00487997
					122.667	30	10	100	0.214286	0.252857		24.115	1.01954	0.0120306
												24.5317	0.985637	0.0116305
												24.9484	0.960036	0.0113284
												25.365	0.911376	0.0107542
												25.7817	0.880785	0.0103933
												26.1984	0.844459	0.00996462
												26.615	0.801773	0.00946092
												27.0317	0.771992	0.00910951
												27.4484	0.736938	0.00869587
												27.865	0.686198	0.00809713
												28.2817	0.664969	0.00784664
												28.6984	0.609603	0.00719332
												29.115	0.585225	0.00690566
												29.5317	0.552281	0.00651692
												29.9484	0.503733	0.00594405
												30.365	0.457991	0.0054043
												30.7817	0.419533	0.00495049
												31.1984	1.02453	0.0120894
												31.615	0.917398	0.0108253
												32.0317	0.825233	0.00973775
												32.4484	0.757754	0.0089415
												32.865	0.65906	0.00777691
												33.2817	0.587305	0.0069302
												33.6984	0.511258	0.00603285
												34.115	0.428207	0.00505285
												34.5317	1.43135	0.01689
												34.9484	1.19433	0.0140931
												35.365	1.02405	0.0120838
												35.7817	0.886899	0.0104654
												36.1984	1.24327	0.0146706
												36.615	1.0415	0.0122897
												37.0317	0.880203	0.0103864
												37.4484	0.756806	0.00893031
												37.865	0.619061	0.00730492
												38.2817	1.75728	0.0207359
												38.6984	1.583	0.0186794
												39.115	1.39579	0.0164703
												39.5317	1.22542	0.0144599
												39.9484	1.15637	0.0136451
												40.365	1.14317	0.0134894
												40.7817	1.85752	0.0219187
												41.1984	1.82094	0.0214871
												42.5003	1.61794	0.0190916
												42.6392	1.53685	0.0181348
												42.7781	1.57588	0.0185954
												42.917	1.57287	0.0185598
												43.0559	1.53467	0.0181091
												43.1948	1.5491	0.0182794
												43.3337	1.54665	0.0182504
												43.4725	1.51296	0.0178529
												43.6114	1.49727	0.0176677
												43.7503	1.497	0.0176646
												43.8892	1.48701	0.0175467
												44.0281	1.42185	0.0167779
												44.167	1.47596	0.0174164
												44.3059	1.31594	0.0155281
												44.4448	1.33665	0.0157724
												44.5836	1.40455	0.0165737
												44.7225	1.306	0.0154108
												44.8614	1.25814	0.0148461
												45.0003	1.18506	0.0139837
												45.1392	1.19248	0.0140712
												45.2781	1.11215	0.0131234
												45.417	1.08597	0.0128144
												45.5559	0.951447	0.0112271
												45.6948	0.911376	0.0107542
												45.8336	0.815556	0.00962357
												45.9725	0.708213	0.00835691
												46.1114	0.651714	0.00769022
												46.2503	0.563698	0.00665163
												46.3892	0.425131	0.00501655
												46.5281	0.532019	0.00627782
												46.667	0.909185	0.0107284
												46.8059	0.682459	0.00805302
												46.9448	0.543165	0.00640935
												47.0837	0.446789	0.00527211
												47.2225	0.363755	0.0042923
												47.3614	-0.0901061	-0.00106325
												47.5003	0.337599	0.00398366
												47.6392	0.625761	0.00738398
												47.7781	1.03819	0.0122507
												47.917	0.75961	0.00896339
												48.0559	0.619754	0.0073131
												48.1948	0.499393	0.00589284
												48.3336	0.263772	0.00311251
												48.4725	1.48971	0.0175785
												48.6114	1.25555	0.0148155
												48.7503	0.711734	0.00839846
												48.8892	0.541719	0.00639228
												49.0281	0.347131	0.00409615
												49.167	0.266152	0.00314059
												49.3059	0.468084	0.00552339
												49.4448	0.190939	0.00225308
												49.5836	1.10207	0.0130044
												49.7225	0.76672	0.0090473
												49.8614	0.433829	0.00511918
												50.0003	0.205684	0.00242707
												50.1392	0.424017	0.0050034
												50.2781	-0.0748955	-0.000883767
												50.417	0.460229	0.0054307
												50.5559	0.736209	0.00868727
												50.6948	0.471904	0.00556846
												50.8336	0.22283	0.0026294
												50.9725	0.539068	0.006361
												51.1114	1.32327	0.0156146
												51.2503	0.652411	0.00769845
												51.3892	0.347694	0.00410279
												51.5281	0.239385	0.00282474
												51.667	0.728196	0.00859271
												51.8059	0.33212	0.00391901
												51.9448	0.164117	0.00193659
												52.0837	1.16031	0.0136917
												52.2225	0.638259	0.00753145
												52.3614	0.521122	0.00614924
												52.5003	2.23408	0.0263621
												52.6392	1.88819	0.0222807
												52.7781	0.319867	0.00377443
												52.917	2.61336	0.0308376
												53.0559	2.16702	0.0255708
												53.1948	1.84184	0.0217337
												53.3337	1.63175	0.0192546
												53.4725	1.50808	0.0177954
												53.6114	1.37803	0.0162608
												53.7503	1.22792	0.0144894
												53.8892	1.20315	0.0141971
												54.0281	1.03648	0.0122304
												54.167	0.932053	0.0109982
												54.3059	0.871592	0.0102848
												54.4448	0.820823	0.00968571
												54.5837	0.773128	0.00912291
												54.7225	0.720194	0.00849829
												54.8614	0.598551	0.0070629
												55.0003	0.491718	0.00580228
												55.1392	0.655383	0.00773351
												55.2781	0.0467541	0.000551698
												55.417	0.012136	0.000143204
												55.5559	0.0349132	0.000411976
												55.6948	0.0253764	0.000299442
												55.8337	0.334642	0.00394877
												55.9725	0.32938	0.00388668
												56.1114	0.407515	0.00480868
												56.2503	0.417751	0.00492946
												56.3892	0.449023	0.00529848
												56.5281	0.435822	0.0051427
												56.667	0.447232	0.00527733
												56.8059	0.454627	0.0053646
												56.9448	0.437387	0.00516117
												57.0837	0.484082	0.00571217
												57.2225	0.513698	0.00606164
												57.3614	0.517326	0.00610445
												57.5003	0.476422	0.00562178
												57.6392	0.531181	0.00626794
												57.7781	0.516646	0.00609642
												57.917	0.550774	0.00649913
												58.0559	0.59293	0.00699657
												58.1948	0.343423	0.00405239
												58.3337	0.133125	0.00157087
												58.4725	0.147726	0.00174317
												58.6114	0.165343	0.00195105
												58.7503	0.153178	0.0018075
												58.8892	0.188325	0.00222224
												59.0281	0.218757	0.00258133
												59.167	0.202034	0.002384
												59.3059	0.207387	0.00244717
												59.4448	0.269015	0.00317438
												59.5836	0.249361	0.00294246
												59.7225	0.284053	0.00335182
												59.8614	0.324663	0.00383103
												60.0003	0.311311	0.00367347
												60.1392	0.357857	0.00422271
												60.2781	0.378623	0.00446775
												60.417	-0.0434084	-0.000512219
												60.5559	-0.0419753	-0.000495308
												60.6948	-0.0438178	-0.00051705
												60.8337	-0.0438178	-0.00051705
												60.9725	-0.0438178	-0.00051705
												61.1114	-0.0438178	-0.00051705
												61.2503	-0.0437744	-0.000516538
												61.3892	-0.0439789	-0.000518951
												61.5281	-0.0439789	-0.000518951
												61.667	-0.0435699	-0.000514125
												61.8059	-0.0464321	-0.000547898
												61.9448	-0.0472495	-0.000557544
												62.0837	-0.0460233	-0.000543075
												62.2225	-0.0484755	-0.000572011
												62.3614	-0.0472495	-0.000557544
												62.5003	-0.0480669	-0.000567189
												62.6392	-0.0509266	-0.000600934
												62.7781	-0.0501097	-0.000591294
												62.917	-0.0488841	-0.000576832
												63.0559	-0.0505182	-0.000596114
												63.1948	-0.0492927	-0.000581653
												63.3337	-0.0507224	-0.000598524
												63.4725	-0.0539889	-0.000637069
												63.6114	-0.0521517	-0.000615391
												63.7503	-0.0492927	-0.000581653
												63.8892	-0.0505182	-0.000596114
												64.0281	-0.0517434	-0.000610572
												64.167	-0.0525601	-0.000620209
												64.3059	-0.0503139	-0.000593704
												64.4448	-0.0516922	-0.000609968
												64.5836	-0.0514882	-0.000607561
												64.7225	-0.0523041	-0.000617188
												64.8614	-0.0533238	-0.000629221
												65.0003	-0.0545472	-0.000643656
												65.1392	-0.0525601	-0.000620209
												65.2781	-0.0525081	-0.000619595
												65.417	-0.0533238	-0.000629221
												65.5559	-0.0537316	-0.000634033
												65.6948	-0.0531725	-0.000627435
												65.8337	-0.0529159	-0.000624408
												65.9725	-0.0545472	-0.000643656
												66.1114	-0.0533766	-0.000629844
												66.2503	-0.0523041	-0.000617188
												66.3892	-0.0537848	-0.000634661
												66.5281	-0.0556214	-0.000656333
												66.667	-0.0550093	-0.00064911
												66.8059	-0.0533766	-0.000629844
												66.9448	-0.0560295	-0.000661148
												67.0836	-0.054193	-0.000639477
												67.2225	-0.0556214	-0.000656333
												67.3614	-0.0550093	-0.00064911
												67.5003	-0.0576614	-0.000680404
												67.6392	-0.0525601	-0.000620209
												67.7781	-0.0564375	-0.000665963
												67.917	-0.0568455	-0.000670777
												68.0559	-0.0578653	-0.000682811
												68.1948	-0.0582732	-0.000687624
												68.3337	-0.0592928	-0.000699655
												68.4725	-0.0570495	-0.000673184
												68.6114	-0.0574574	-0.000677998
												68.7503	-0.0580693	-0.000685217
												68.8892	-0.0584771	-0.00069003
												69.0281	-0.058885	-0.000694843
												69.167	-0.0568455	-0.000670777
												69.3059	-0.0582732	-0.000687624
												69.4448	-0.0580693	-0.000685217
												69.5837	-0.0572535	-0.000675591
												69.7225	-0.0578653	-0.000682811
												69.8614	-0.058885	-0.000694843
												70.0003	-0.0566415	-0.00066837
												70.1392	-0.0578653	-0.000682811
												70.2781	-0.0582732	-0.000687624
												70.417	-0.0556214	-0.000656333
												70.5559	-0.060516	-0.000714089
												70.6948	-0.0560295	-0.000661148
												70.8337	-0.0582732	-0.000687624
												70.9725	-0.0574574	-0.000677998
												71.1114	-0.0578653	-0.000682811
												71.2503	-0.0578653	-0.000682811
												71.3892	-0.0576614	-0.000680404
												71.5281	-0.0566415	-0.00066837
												71.667	-0.060516	-0.000714089
												71.8059	-0.0611275	-0.000721305
												71.9448	-0.0631654	-0.000745351
												72.0836	-0.0621465	-0.000733329
												72.2225	-0.0617389	-0.00072852
												72.3614	-0.0649988	-0.000766985
												72.5003	-0.0652024	-0.000769389
												72.6392	-0.0664243	-0.000783807
												72.7781	-0.066017	-0.000779001
												72.917	-0.0688672	-0.000812633
												73.0559	-0.0674423	-0.000795819
												73.1948	-0.0613313	-0.00072371
												73.3337	0.187071	0.00220744
												73.4725	0.175344	0.00206906
												73.6114	-0.0678495	-0.000800624
												73.7503	-0.0654061	-0.000771792
												73.8892	-0.0686637	-0.000810232
												74.0281	-0.068053	-0.000803026
												74.167	-0.0696813	-0.000822239
												74.3059	-0.0676459	-0.000798222
												74.4448	-0.0686637	-0.000810232
												74.5836	-0.0656098	-0.000774195
												74.7225	-0.0649988	-0.000766985
												74.8614	-0.0649988	-0.000766985
												75.0003	-0.0649988	-0.000766985
												75.1392	-0.0649988	-0.000766985
												75.2781	-0.0631654	-0.000745351
												75.417	-0.0625541	-0.000738138
												75.5559	-0.0603121	-0.000711683
												75.6948	-0.0613313	-0.00072371
												75.8337	-0.0599044	-0.000706872
												75.9725	-0.0574574	-0.000677998
												76.1114	-0.058885	-0.000694843
												76.2503	-0.0590889	-0.000697249
												76.3892	-0.0570495	-0.000673184
												76.5292	-0.0576614	-0.000680404
												76.6681	-0.0566976	-0.000669032
												76.807	-0.0581268	-0.000685897
												76.9459	-0.0564934	-0.000666623
												77.0848	-0.0558808	-0.000659393
												77.2237	-0.0558808	-0.000659393
												77.3625	-0.0566976	-0.000669032
												77.5014	-0.0546553	-0.000644932
												77.6403	-0.0517947	-0.000611177
												77.7792	-0.0532252	-0.000628057
												77.9181	-0.0515903	-0.000608765
												78.057	-0.0530208	-0.000625646
												78.1959	-0.0509771	-0.00060153
												78.3348	-0.049137	-0.000579817
												78.4737	-0.0505682	-0.000596705
												78.6125	-0.0485235	-0.000572578
												78.7514	-0.0519991	-0.000613589
												78.8903	-0.049546	-0.000584643
												79.0292	-0.0519991	-0.000613589
												79.1681	-0.0517947	-0.000611177
												79.307	-0.0475009	-0.000560511
												79.4459	-0.0505682	-0.000596705
												79.5848	-0.04791	-0.000565338
												79.7236	-0.0507727	-0.000599117
												79.8625	-0.0503638	-0.000594293
												80.0014	-0.048319	-0.000570165
												80.1403	-0.0497505	-0.000587055
												80.2792	-0.0515903	-0.000608765
												80.4181	-0.049546	-0.000584643
												80.557	-0.049137	-0.000579817
												80.6959	-0.0487281	-0.000574991
												80.8348	-0.0505682	-0.000596705
												80.9736	-0.0503139	-0.000593704
												81.1125	-0.0494969	-0.000584064
												81.2514	-0.0494969	-0.000584064
												81.3903	-0.0511815	-0.000603942
												81.5292	-0.0517434	-0.000610572
												81.6681	-0.0524078	-0.000618412
												81.807	-0.0524078	-0.000618412
												81.9459	-0.0552681	-0.000652163
												82.0848	-0.0540424	-0.000637701
												82.2237	-0.0519991	-0.000613589
												82.3625	-0.0552681	-0.000652163
												82.5014	-0.0524078	-0.000618412
												82.6403	-0.0511815	-0.000603942
												82.7792	-0.0517947	-0.000611177
												82.9181	-0.0532252	-0.000628057
												83.057	-0.0526122	-0.000620823
												83.1959	-0.0540424	-0.000637701
												83.3348	-0.0534295	-0.000630468
												83.4736	-0.0538381	-0.00063529
												83.6125	-0.0536338	-0.000632879
												83.7514	-0.0533766	-0.000629844
												83.8903	-0.0523559	-0.0006178
												84.0292	-0.051335	-0.000605753
												84.1681	-0.0533766	-0.000629844
												84.307	-0.0548596	-0.000647343
												84.4459	-0.0534295	-0.000630468
												84.5848	-0.0526122	-0.000620823
												84.7236	-0.0542467	-0.000640111
												84.8625	-0.0548052	-0.000646702
												85.0014	-0.0558255	-0.00065874
												85.1403	-0.0564375	-0.000665963
												85.2792	-0.0539889	-0.000637069
												85.4181	-0.0562335	-0.000663555
												85.557	-0.0578653	-0.000682811
												85.6959	-0.054193	-0.000639477
												85.8348	-0.0564375	-0.000665963
												85.9737	-0.0592928	-0.000699655
												86.1125	-0.0568455	-0.000670777
												86.2514	-0.0594967	-0.000702061
												86.3903	-0.0568455	-0.000670777
												86.5292	-0.0594967	-0.000702061
												86.6681	-0.0576614	-0.000680404
												86.807	-0.0564375	-0.000665963
												86.9459	-0.0556214	-0.000656333
												87.0848	-0.0594967	-0.000702061
												87.2236	-0.0550093	-0.00064911
												87.3625	-0.0594967	-0.000702061
												87.5014	-0.0592928	-0.000699655
												87.6403	-0.0535807	-0.000632252
												87.7792	-0.0621465	-0.000733329
												87.9181	-0.0611275	-0.000721305
												88.057	-0.060516	-0.000714089
												88.1959	-0.0564375	-0.000665963
												88.3348	-0.0603121	-0.000711683
												88.4736	-0.0625541	-0.000738138
												88.6125	-0.0588267	-0.000694155
												88.7514	-0.0564375	-0.000665963
												88.8903	-0.0592928	-0.000699655
												89.0292	-0.0566415	-0.00066837
												89.1681	-0.0476582	-0.000562367
												89.307	-0.0285928	-0.000337395
												89.4459	-0.0361673	-0.000426774
												89.5848	-0.0357936	-0.000422364
												89.7236	-0.0597005	-0.000704466
												89.8625	-0.0592928	-0.000699655
												90.0014	-0.0628993	-0.000742212
												90.1403	-0.0594967	-0.000702061
												90.2792	-0.0492927	-0.000581653
												90.4181	-0.0433654	-0.000511712
												90.557	-0.0421383	-0.000497232
												90.6959	0.0111029	0.000131015
												90.8348	-0.0445923	-0.000526189
												90.9736	-0.0206177	-0.000243288
												91.1125	0.00428986	5.06203e-05
												91.2514	0.0137892	0.000162713
												91.3903	0.0102766	0.000121264
												91.5292	-0.0462277	-0.000545486
												91.6681	-0.0257495	-0.000303844
												91.807	-0.0554174	-0.000653925
												91.9459	0.0515394	0.000608165
												92.0848	0.044467	0.00052471
												92.2236	0.0434277	0.000512447
												92.3625	0.0644601	0.00076063
												92.5014	0.166619	0.0019661
												92.6403	0.0318016	0.000375258
												92.7792	0.0598718	0.000706487
												92.9181	0.0696789	0.000822211
												93.057	0.0239267	0.000282335
												93.1959	0.121303	0.00143138
												93.3348	0.138834	0.00163824
												93.4737	0.157483	0.00185829
												93.6125	0.0322163	0.000380153
												93.7514	0.160668	0.00189588
												93.8903	0.108877	0.00128475
												94.0292	0.0563289	0.000664682
												94.1681	0.117088	0.00138164
												94.307	0.286815	0.00338441
												94.4459	0.0328386	0.000387495
												94.5848	0.114139	0.00134684
												94.7236	0.00759209	8.95866e-05
												94.8625	0.0355358	0.000419322
												95.0014	0.169384	0.00199873
												95.1403	0.202676	0.00239157
												95.2792	0.191342	0.00225784
												95.4181	0.217252	0.00256358
												95.557	0.174705	0.00206152
												95.6959	0.162367	0.00191593
												95.8348	0.139045	0.00164073
												95.9736	0.15239	0.0017982
												96.1125	0.206745	0.00243959
												96.2514	0.239622	0.00282754
												96.3903	0.128055	0.00151105
												96.5292	0.207387	0.00244717
												96.6681	0.197113	0.00232593
												96.807	0.160243	0.00189087
												96.9459	0.120671	0.00142392
												97.0848	0.0977382	0.00115331
												97.2237	0.0715589	0.000844395
												97.3625	0.155997	0.00184076
												97.5014	0.0561206	0.000662223
												97.6403	0.110139	0.00129964
												97.7792	0.0694701	0.000819747
												97.9181	0.0264122	0.000311664
												98.057	0.0801317	0.000945554
												98.1959	0.0746937	0.000881386
												98.3348	-0.00416283	-4.91214e-05
												98.4737	0.0111029	0.000131015
												98.6125	-0.058885	-0.000694843
												98.7514	-0.0507224	-0.000598524
												98.8903	-0.0476582	-0.000562367
												99.0292	-0.028416	-0.000335309
												99.1681	-0.04541	-0.000535838
												99.307	-0.0405016	-0.000477919
												99.4459	-0.0319011	-0.000376433
												99.5848	-0.0384552	-0.000453771
												99.7237	-0.0411154	-0.000485162
												99.8625	-0.0251339	-0.00029658
												100.001	-0.0409108	-0.000482748
												100.14	-0.0411154	-0.000485162
												100.279	-0.0431609	-0.000509299
												100.418	-0.0411154	-0.000485162
												100.557	-0.0359983	-0.00042478
												100.696	-0.0392738	-0.000463431
												100.835	-0.0405016	-0.000477919
												100.974	-0.0388645	-0.000458601
												101.113	-0.0394785	-0.000465846
												101.251	-0.0390692	-0.000461016
												101.39	-0.0386598	-0.000456186
												101.529	-0.0366489	-0.000432457
												101.668	-0.0382884	-0.000451803
												101.807	-0.0386982	-0.000456638
												101.946	-0.038903	-0.000459056
												102.085	-0.0296757	-0.000350174
												102.224	-0.0321379	-0.000379227
												102.363	-0.035829	-0.000422783
												102.501	-0.0307018	-0.000362281
												102.64	-0.035214	-0.000415525
												102.779	-0.0268018	-0.000316261
												102.918	-0.0329911	-0.000389295
												103.057	-0.0327858	-0.000386872
												103.196	-0.0270339	-0.000319
												103.335	-0.0299106	-0.000352945
												103.474	-0.0325804	-0.000384449
												103.613	-0.0321698	-0.000379603
												103.751	-0.0268284	-0.000316575
												103.89	-0.0286779	-0.000338399
												104.029	-0.0260061	-0.000306872
												104.168	-0.025595	-0.000302021
												104.307	-0.0262117	-0.000309298
												104.446	-0.02395	-0.00028261
												104.585	-0.0254146	-0.000299892
												104.724	-0.0239738	-0.000282891
												104.863	-0.0231503	-0.000273174
												105.001	-0.0227385	-0.000268314
												105.14	-0.0217089	-0.000256165
												105.279	-0.0219148	-0.000258595
												105.418	-0.0217089	-0.000256165
												105.557	-0.021503	-0.000253735
												105.696	-0.0173824	-0.000205112
												105.835	-0.0184128	-0.000217271
												105.974	-0.0202671	-0.000239152
												106.113	-0.0134649	-0.000158886
												106.251	-0.0210701	-0.000248627
												106.39	-0.0196296	-0.000231629
												106.529	-0.0204731	-0.000241583
												106.668	-0.022716	-0.000268048
												106.807	-0.0223045	-0.000263194
												106.946	0.14229	0.00167902
												107.085	0.0830171	0.000979602
												107.224	0.0627691	0.000740675
												107.363	0.0196381	0.000231729
												107.501	0.162051	0.0019122
												107.64	0.165409	0.00195183
												107.779	0.184663	0.00217902
												107.918	0.28107	0.00331662
												108.057	0.12759	0.00150556
												108.196	0.226087	0.00266782
												108.335	0.337399	0.00398131
												108.474	0.367191	0.00433285
												108.613	0.309432	0.0036513
												108.751	0.417432	0.0049257
												108.89	0.247258	0.00291765
												109.029	0.342023	0.00403587
												109.168	0.536643	0.00633238
												109.307	0.435104	0.00513423
												109.446	0.420812	0.00496558
												109.585	0.408952	0.00482563
												109.724	0.480753	0.00567288
												109.863	0.506093	0.0059719
												110.001	0.583056	0.00688006
												110.14	0.631103	0.00744702
												110.279	0.686365	0.00809911
												110.418	0.692462	0.00817105
												110.557	0.654819	0.00772686
												110.696	0.670686	0.0079141
												110.835	0.741477	0.00874943
												110.974	0.842036	0.00993602
												111.113	0.901406	0.0106366
												111.251	0.846376	0.00998724
												111.39	0.922642	0.0108872
												111.529	0.980658	0.0115718
												111.668	0.929004	0.0109622
												111.807	1.01188	0.0119402
												111.946	0.946169	0.0111648
												112.085	1.03205	0.0121781
												112.224	1.13372	0.0133779
												112.363	1.0955	0.0129269
												112.501	1.12129	0.0132312
												112.64	1.15356	0.013612
												112.779	1.04053	0.0122783
												112.918	-0.053687	-0.000633507
												113.057	-0.0524598	-0.000619026
												113.196	-0.0538915	-0.00063592
												113.335	-0.0563451	-0.000664872
												113.474	-0.0547095	-0.000645572
												113.613	-0.0553229	-0.00065281
												113.751	-0.0566976	-0.000669032
												113.89	-0.0526644	-0.000621439
												114.029	-0.0534825	-0.000631094
												114.168	-0.0509771	-0.00060153
												114.307	-0.0464781	-0.000548441
												114.446	-0.0450458	-0.00053154
												114.585	-0.0452504	-0.000533955
												114.724	-0.045455	-0.00053637
												114.863	-0.0438178	-0.00051705
												115.001	-0.0513859	-0.000606354
												115.14	-0.0417705	-0.000492892
												115.279	-0.041361	-0.00048806
												115.418	-0.0475009	-0.000560511
												115.557	-0.0487281	-0.000574991
												115.696	-0.0386598	-0.000456186
												115.835	-0.0468408	-0.000552721
												115.974	-0.0355888	-0.000419947
												116.113	-0.0466364	-0.00055031
												116.251	-0.0319011	-0.000376433
												116.39	-0.032311	-0.00038127
												116.529	-0.0302614	-0.000357084
												116.668	-0.0384552	-0.000453771
												116.807	-0.0355888	-0.000419947
												116.946	-0.0200015	-0.000236018
												117.085	-0.032311	-0.00038127
												117.224	-0.0259546	-0.000306265
												117.363	-0.0286211	-0.000337729
												117.501	-0.0226485	-0.000267253
												117.64	-0.025724	-0.000303543
												117.779	-0.0269537	-0.000318053
												117.918	-0.0263389	-0.000310799
												118.057	-0.024904	-0.000293868
												118.196	-0.0130007	-0.000153408
												118.335	-0.0166977	-0.000197032
												118.474	-0.0166977	-0.000197032
												118.613	-0.0045703	-5.39295e-05
												118.751	-0.00683341	-8.06343e-05
												118.89	-0.024699	-0.000291449
												119.029	-0.0160817	-0.000189764
												119.168	-0.0294122	-0.000347064
												119.307	-0.00539336	-6.36416e-05
												119.446	-0.0119733	-0.000141285
												119.585	-0.0205973	-0.000243048
												119.724	-0.00292379	-3.45007e-05
												119.863	-0.00230394	-2.71865e-05
												120.001	-0.0213967	-0.000252481
												120.14	0.00840132	9.91356e-05
												120.279	-0.00888118	-0.000104798
												120.418	-0.0018926	-2.23326e-05
												120.557	-0.0029209	-3.44666e-05
												120.696	-0.0160658	-0.000189576
												120.835	-0.00538803	-6.35787e-05
												120.974	-0.00415461	-4.90244e-05
												121.113	-0.00353779	-4.17459e-05
												121.251	-0.0125773	-0.000148412
												121.39	-0.00970276	-0.000114493
												121.529	-0.00723763	-8.5404e-05
												121.668	-0.0074431	-8.78286e-05
												121.807	-0.00333217	-3.93196e-05
												121.946	-0.0029209	-3.44666e-05
												122.085	-0.0166812	-0.000196838
												122.224	-0.016476	-0.000194417
												122.363	-0.0101135	-0.000119339
												122.501	-0.0654801	-0.000772665
												122.64	-0.070965	-0.000837387

## Sheet: Gas cultivation 2
Ferm. Samples (internal # 12)					Manually adjusted gasflow					Hcp 1.18 mM/atm		Dissolved Oxygen readout (1 point per 3 minutes)
Time [h]	OD600	STD OD600	gcdw [g/L]		Time [h]	O2 [NmL/min]	CO2 [NmL/min]	H2 [NmL/min]	pO2 [atm]	O* at t [mM]		Time [h]	DO [% saturation]	DO [mM]
					0	2	10	85	0.0206186	0.0243299		0.110917	0.615054	0.00725764
0	0.65	0	0.15964		4.50167	2	10	85	0.0206186	0.0243299		0.138693	0.391975	0.00462531
4.5	1.06667	0.0471405	0.261973		4.50167	3	10	85	0.0306122	0.0361224		0.166476	0.291383	0.00343831
23.75	2.23333	0.0471405	0.548507		4.59465	3	10	85	0.0306122	0.0361224		0.194248	0.224125	0.00264468
28.6667	2.23333	0.0471405	0.548507		4.59465	4	10	85	0.040404	0.0476768		0.22202	0.225845	0.00266497
47.5	2.66667	0.0942809	0.654933		5.93682	4	10	85	0.040404	0.0476768		0.2498	0.607439	0.00716778
52.4167	3.53333	0.0942809	0.867787		5.93682	5	10	85	0.05	0.059		0.277585	1.53374	0.0180981
71.5	22.6667	0.942809	5.56693		6.72982	5	10	85	0.05	0.059		0.305358	2.98532	0.0352268
76	27.6667	0.471405	6.79493		6.72982	6	10	85	0.0594059	0.070099		0.333131	5.2357	0.0617812
90	35	0.816497	8.596		7.92218	6	10	85	0.0594059	0.070099		0.36091	8.29534	0.097885
					7.92218	4	10	85	0.040404	0.0476768		0.388694	11.6966	0.13802
					8.02423	4	10	85	0.040404	0.0476768		0.416467	15.3318	0.180915
					8.02423	3	10	85	0.0306122	0.0361224		0.444248	19.0078	0.224292
					8.11579	3	10	85	0.0306122	0.0361224		0.472021	22.5181	0.265713
					8.11579	2	10	85	0.0206186	0.0243299		0.4998	42.2584	0.498649
					28.6122	2	10	85	0.0206186	0.0243299		0.52758	13.6909	0.161552
					28.6122	3	10	85	0.0306122	0.0361224		0.555351	4.04141	0.0476887
					45.4924	3	10	85	0.0306122	0.0361224		0.583134	2.1392	0.0252426
					45.4924	4	10	85	0.040404	0.0476768		0.610919	1.65028	0.0194733
					48.5714	4	10	85	0.040404	0.0476768		0.638691	1.49253	0.0176119
					48.5714	5	10	85	0.05	0.059		0.666472	1.44063	0.0169995
					49.7065	5	10	85	0.05	0.059		0.694247	1.41873	0.016741
					49.7065	6	10	85	0.0594059	0.070099		0.722019	1.40248	0.0165493
					51.7881	6	10	85	0.0594059	0.070099		0.749798	1.39398	0.016449
					51.7881	8	10	85	0.0776699	0.0916505		0.777582	1.37728	0.0162519
					52.6789	8	10	85	0.0776699	0.0916505		0.805355	1.3667	0.0161271
					52.6789	10	10	85	0.0952381	0.112381		0.833136	1.37093	0.016177
					54.1102	10	10	85	0.0952381	0.112381		0.860919	1.35825	0.0160274
					54.1102	12	10	85	0.11215	0.132336		0.888688	1.3535	0.0159713
					55.1114	12	10	85	0.11215	0.132336		0.916463	1.3335	0.0157353
					55.1114	14	10	85	0.12844	0.15156		0.944248	1.33639	0.0157695
					56.0299	14	10	85	0.12844	0.15156		0.972018	1.32222	0.0156022
					56.0299	16	10	85	0.144144	0.17009		0.999806	1.31803	0.0155527
					56.2078	16	10	85	0.144144	0.17009		1.02758	1.30024	0.0153428
					56.2078	17	10	85	0.151786	0.179107		1.05536	1.29685	0.0153028
					56.6713	17	10	85	0.151786	0.179107		1.08313	1.29215	0.0152474
					56.6713	20	10	85	0.173913	0.205217		1.11091	1.28147	0.0151213
					56.8598	20	20	200	0.0833333	0.0983333		1.13869	1.27289	0.01502
					56.8598	40	20	200	0.153846	0.181538		1.16647	1.26224	0.0148944
					56.8623	40	20	200	0.153846	0.181538		1.19425	1.25965	0.0148638
					56.8623	20	20	200	0.0833333	0.0983333		1.22202	1.2542	0.0147996
					56.8645	20	20	200	0.0833333	0.0983333		1.2498	1.24359	0.0146744
					56.8645	9	20	200	0.0393013	0.0463755		1.27758	1.24178	0.0146531
					56.8851	9	20	200	0.0393013	0.0463755		1.30536	1.23249	0.0145433
					56.8851	20	20	200	0.0833333	0.0983333		1.33314	1.21471	0.0143336
					56.9076	20	20	200	0.0833333	0.0983333		1.36091	1.21188	0.0143002
					56.9076	25	20	200	0.102041	0.120408		1.38869	1.19007	0.0140428
					56.9444	25	20	200	0.102041	0.120408		1.41647	1.18214	0.0139492
					56.9444	27	20	200	0.109312	0.128988		1.44425	1.18265	0.0139552
					56.9999	27	20	200	0.109312	0.128988		1.47202	1.17294	0.0138407
					56.9999	30	20	200	0.12	0.1416		1.4998	1.15662	0.0136481
					57.1791	30	20	200	0.12	0.1416		1.52758	1.14721	0.0135371
					57.1791	32	20	200	0.126984	0.149841		1.55535	1.14137	0.0134681
					57.3267	32	20	200	0.126984	0.149841		1.58314	1.12286	0.0132498
					57.3267	35	20	200	0.137255	0.161961		1.61091	1.10972	0.0130947
					57.4941	35	20	200	0.137255	0.161961		1.63869	1.1221	0.0132408
					57.4941	37	20	200	0.143969	0.169883		1.66647	1.10013	0.0129816
					57.8162	37	20	200	0.143969	0.169883		1.69424	1.08981	0.0128597
					57.8162	40	20	200	0.153846	0.181538		1.72203	1.07925	0.0127352
					58.2029	40	20	200	0.153846	0.181538		1.7498	1.07147	0.0126434
					58.2029	39	20	200	0.150579	0.177683		1.77758	1.06571	0.0125754
					58.2873	39	20	200	0.150579	0.177683		1.80536	1.0517	0.01241
					58.2873	38	20	200	0.147287	0.173798		1.83314	1.04396	0.0123187
					58.2996	38	20	200	0.147287	0.173798		1.86091	1.03025	0.012157
					58.2996	37	20	200	0.143969	0.169883		1.88869	1.02007	0.0120368
					58.3157	37	20	200	0.143969	0.169883		1.91647	1.02156	0.0120544
					58.3157	35	20	200	0.137255	0.161961		1.94425	0.998975	0.0117879
					58.8903	35	20	200	0.137255	0.161961		1.97203	0.991301	0.0116973
					58.8903	34	20	200	0.133858	0.157953		1.9998	0.986108	0.0116361
					62.9596	34	20	200	0.133858	0.157953		2.02758	0.96317	0.0113654
					62.9596	30	20	200	0.12	0.1416		2.05536	0.941061	0.0111045
					68.6495	30	20	200	0.12	0.1416		2.08314	0.950385	0.0112145
					68.6495	32	20	200	0.126984	0.149841		2.11092	0.934936	0.0110322
					72.5255	32	20	200	0.126984	0.149841		2.1387	0.927105	0.0109398
					72.5255	34	20	200	0.133858	0.157953		2.16647	0.914402	0.0107899
					74.8203	34	20	200	0.133858	0.157953		2.19425	0.906357	0.010695
					74.8203	36	20	200	0.140625	0.165937		2.22202	0.883501	0.0104253
					78.8624	36	20	200	0.140625	0.165937		2.2498	0.879136	0.0103738
					78.8624	34	20	200	0.133858	0.157953		2.27758	0.866542	0.0102252
					88.7463	34	20	200	0.133858	0.157953		2.30536	0.847706	0.0100029
					88.7463	30	20	200	0.12	0.1416		2.33314	0.834703	0.0098495
					88.76	30	20	200	0.12	0.1416		2.36091	0.832539	0.00982396
												2.38869	0.802089	0.00946465
												2.41647	0.787523	0.00929277
												2.44425	0.783709	0.00924776
												2.47203	0.774422	0.00913818
												2.4998	0.76729	0.00905402
												2.52758	0.755896	0.00891958
												2.55536	0.74713	0.00881614
												2.58313	0.733653	0.0086571
												2.61091	0.721386	0.00851235
												2.63869	0.69623	0.00821552
												2.66646	0.69201	0.00816571
												2.69425	0.668621	0.00788973
												2.72203	0.653704	0.00771371
												2.7498	0.630477	0.00743963
												2.77758	0.59513	0.00702253
												2.80536	0.58064	0.00685156
												2.83314	0.560923	0.00661889
												2.86092	0.559321	0.00659999
												2.88869	0.525565	0.00620166
												2.91647	0.526929	0.00621776
												2.94425	0.496084	0.0058538
												2.97203	0.467662	0.00551841
												2.9998	0.459569	0.00542291
												3.02758	0.426197	0.00502913
												3.05535	0.420172	0.00495803
												3.08314	0.427314	0.0050423
												3.11092	0.392807	0.00463513
												3.13869	0.37265	0.00439727
												3.16647	0.379951	0.00448343
												3.19425	0.354991	0.00418889
												3.22202	0.353889	0.00417589
												3.2498	0.313279	0.00369669
												3.27759	0.323787	0.00382068
												3.30536	0.285141	0.00336466
												3.33313	0.26798	0.00316217
												3.36092	0.268848	0.0031724
												3.38869	0.244608	0.00288638
												3.41647	0.254334	0.00300114
												3.44425	0.213387	0.00251796
												3.47203	0.182345	0.00215167
												3.4998	0.178717	0.00210886
												3.52758	0.171682	0.00202584
												3.55536	0.163592	0.00193038
												3.58314	0.141513	0.00166985
												3.61092	0.116149	0.00137056
												3.63869	0.0879669	0.00103801
												3.66646	0.0890159	0.00105039
												3.69425	0.0951038	0.00112222
												3.72202	0.0825157	0.000973685
												3.7498	0.0430547	0.000508045
												3.77758	0.0399352	0.000471236
												3.80536	0.0393116	0.000463876
												3.83314	0.0142167	0.000167757
												3.86091	0.0051203	6.04195e-05
												3.88869	-0.0204325	-0.000241104
												3.91647	-0.0401321	-0.000473559
												3.94424	-0.0384933	-0.000454221
												3.97202	-0.035624	-0.000420364
												3.9998	-0.04791	-0.000565338
												4.02757	-0.0497505	-0.000587055
												4.05536	-0.0450458	-0.00053154
												4.08313	-0.0481145	-0.000567751
												4.11092	-0.0519991	-0.000613589
												4.13869	-0.0497505	-0.000587055
												4.16646	-0.048319	-0.000570165
												4.19424	-0.048319	-0.000570165
												4.22202	-0.0509771	-0.00060153
												4.24981	-0.0489325	-0.000577404
												4.27758	-0.0540424	-0.000637701
												4.30535	-0.0554723	-0.000654573
												4.33314	-0.0542467	-0.000640111
												4.36092	-0.0485235	-0.000572578
												4.3887	-0.0556766	-0.000656983
												4.41647	-0.054451	-0.000642522
												4.44424	-0.0556766	-0.000656983
												4.4724	-0.056085	-0.000661803
												4.4998	-0.0575144	-0.00067867
												4.52758	0.0111139	0.000131144
												4.55536	-0.0603719	-0.000712389
												4.58314	0.425304	0.00501859
												4.61092	0.407251	0.00480557
												4.6387	0.786092	0.00927589
												4.66647	1.3943	0.0164527
												4.69424	1.53063	0.0180615
												4.72203	1.58807	0.0187392
												4.7498	1.58312	0.0186808
												4.77758	1.6372	0.019319
												4.80536	1.62917	0.0192242
												4.83313	1.58065	0.0186517
												4.86091	1.56776	0.0184996
												4.88868	1.56393	0.0184544
												4.91647	1.54835	0.0182705
												4.94425	1.53063	0.0180615
												4.97203	1.49807	0.0176772
												4.9998	1.44126	0.0170068
												5.02759	1.42921	0.0168647
												5.05536	1.41746	0.0167261
												5.08314	1.40627	0.016594
												5.11092	1.37282	0.0161992
												5.13869	1.34799	0.0159063
												5.16647	1.31461	0.0155125
												5.19424	1.31802	0.0155527
												5.22203	1.32327	0.0156146
												5.2498	1.27571	0.0150534
												5.27757	1.22622	0.0144694
												5.30536	1.13488	0.0133916
												5.33313	1.14301	0.0134875
												5.36091	1.15318	0.0136075
												5.38869	1.15165	0.0135895
												5.41646	1.06827	0.0126056
												5.44425	1.06551	0.012573
												5.47202	1.00418	0.0118493
												5.4998	0.998232	0.0117791
												5.52757	0.954316	0.0112609
												5.55536	0.945722	0.0111595
												5.58313	0.921971	0.0108793
												5.61091	0.925149	0.0109168
												5.63869	0.882046	0.0104081
												5.66647	0.829414	0.00978709
												5.69425	0.845778	0.00998018
												5.72202	0.777516	0.00917469
												5.7498	0.755896	0.00891958
												5.77758	0.766339	0.0090428
												5.80536	0.669321	0.00789799
												5.83313	0.676796	0.00798619
												5.86092	0.64324	0.00759023
												5.88869	0.60781	0.00717216
												5.91646	0.586615	0.00692206
												5.94425	0.606425	0.00715582
												5.97202	0.591446	0.00697906
												5.9998	1.14606	0.0135235
												6.02758	1.39775	0.0164935
												6.05536	1.41133	0.0166537
												6.08313	1.47404	0.0173936
												6.11092	1.44179	0.0170132
												6.1387	1.41746	0.0167261
												6.16647	1.43162	0.0168931
												6.19425	1.38342	0.0163243
												6.22203	1.35643	0.0160059
												6.24981	1.28639	0.0151794
												6.27758	1.26271	0.0149
												6.30535	1.25726	0.0148357
												6.33313	1.23972	0.0146287
												6.36091	1.19238	0.01407
												6.38869	1.15255	0.0136001
												6.41647	1.13654	0.0134112
												6.44424	1.07022	0.0126286
												6.47202	1.12843	0.0133155
												6.4998	1.03174	0.0121746
												6.52758	1.00269	0.0118317
												6.55536	1.01137	0.0119341
												6.58314	0.924721	0.0109117
												6.61091	0.940619	0.0110993
												6.63869	0.908868	0.0107246
												6.66646	0.86786	0.0102407
												6.69425	0.808226	0.00953707
												6.72203	0.747336	0.00881857
												6.7498	0.762022	0.00899186
												6.77758	0.986613	0.011642
												6.80535	1.55063	0.0182975
												6.83313	1.58759	0.0187336
												6.86091	1.61816	0.0190943
												6.88869	1.59804	0.0188568
												6.91647	1.59336	0.0188017
												6.94425	1.57059	0.0185329
												6.97202	1.59089	0.0187725
												6.9998	1.60327	0.0189186
												7.02758	1.60134	0.0188958
												7.05536	1.57662	0.0186041
												7.08313	1.68704	0.0199071
												7.11092	1.75421	0.0206997
												7.1387	1.9348	0.0228306
												7.16646	2.18131	0.0257395
												7.19425	2.5406	0.0299791
												7.22203	2.92249	0.0344854
												7.2498	3.27321	0.0386239
												7.27758	3.58125	0.0422588
												7.30535	3.86277	0.0455807
												7.33313	4.12656	0.0486934
												7.36091	4.38651	0.0517608
												7.38869	4.59751	0.0542506
												7.41647	4.77545	0.0563503
												7.44425	4.87353	0.0575077
												7.47202	4.97674	0.0587256
												7.4998	5.03978	0.0594694
												7.52757	5.09957	0.0601749
												7.55536	5.14306	0.0606881
												7.58314	5.17284	0.0610395
												7.61091	5.1791	0.0611134
												7.6387	5.20178	0.0613811
												7.66647	5.20323	0.0613982
												7.69425	5.20323	0.0613982
												7.72202	5.19889	0.0613468
												7.7498	5.18199	0.0611475
												7.77758	5.18826	0.0612215
												7.80536	5.16274	0.0609203
												7.83314	5.14641	0.0607277
												7.86091	5.14498	0.0607107
												7.88869	5.11626	0.0603719
												7.91647	5.10147	0.0601974
												7.94425	5.09004	0.0600625
												7.97202	4.60506	0.0543397
												7.9998	3.51189	0.0414403
												8.02758	3.29358	0.0388643
												8.05536	3.24205	0.0382562
												8.08313	2.72808	0.0321913
												8.11092	2.35843	0.0278294
												8.13869	2.27724	0.0268714
												8.16646	1.94589	0.0229614
												8.19425	1.42994	0.0168733
												8.22202	1.32904	0.0156827
												8.2498	1.2898	0.0152197
												8.27758	1.28303	0.0151398
												8.30535	1.28303	0.0151398
												8.33314	1.27835	0.0150845
												8.36092	1.28381	0.015149
												8.38869	1.28511	0.0151643
												8.41646	1.28694	0.0151859
												8.44425	1.28642	0.0151797
												8.47202	1.29111	0.0152351
												8.49981	1.30233	0.0153675
												8.52758	1.30311	0.0153767
												8.55535	1.30364	0.0153829
												8.58313	1.32091	0.0155867
												8.61091	1.32379	0.0156208
												8.63869	1.32432	0.0156269
												8.66647	1.33771	0.015785
												8.69424	1.33377	0.0157384
												8.72202	1.34139	0.0158284
												8.7498	1.35746	0.016018
												8.77758	1.34902	0.0159185
												8.80536	1.36247	0.0160772
												8.83313	1.36881	0.016152
												8.86091	1.36908	0.0161551
												8.88869	1.36881	0.016152
												8.91647	1.3847	0.0163394
												8.94424	1.38443	0.0163363
												8.97202	1.38178	0.016305
												8.9998	1.39212	0.016427
												9.02757	1.40009	0.0165211
												9.05536	1.40222	0.0165462
												9.08313	1.40248	0.0165493
												9.11092	1.40222	0.0165462
												9.13869	1.4126	0.0166686
												9.16646	1.41633	0.0167127
												9.19425	1.42139	0.0167724
												9.22202	1.42086	0.0167661
												9.2498	1.4134	0.0166781
												9.27758	1.42433	0.0168071
												9.30536	1.43288	0.0169079
												9.33314	1.44144	0.017009
												9.36091	1.44465	0.0170469
												9.38869	1.44921	0.0171006
												9.41647	1.45135	0.0171259
												9.44425	1.4476	0.0170817
												9.47202	1.45403	0.0171576
												9.49981	1.46182	0.0172495
												9.52758	1.47096	0.0173574
												9.55536	1.47204	0.0173701
												9.58314	1.47042	0.017351
												9.61091	1.47392	0.0173923
												9.63869	1.47985	0.0174622
												9.66648	1.48336	0.0175036
												9.69424	1.4847	0.0175195
												9.72202	1.4901	0.0175832
												9.7498	1.49361	0.0176246
												9.77757	1.50254	0.0177299
												9.80535	1.50687	0.017781
												9.83314	1.51012	0.0178194
												9.86092	1.50795	0.0177938
												9.88869	1.51256	0.0178482
												9.91646	1.51852	0.0179186
												9.94425	1.52341	0.0179762
												9.97202	1.52504	0.0179955
												9.9998	1.52694	0.0180179
												10.0276	1.52368	0.0179794
												10.0554	1.52585	0.0180051
												10.0831	1.53075	0.0180628
												10.1109	1.53918	0.0181624
												10.1387	1.53809	0.0181495
												10.1665	1.54	0.018172
												10.1942	1.54327	0.0182106
												10.222	1.54409	0.0182202
												10.2498	1.54954	0.0182846
												10.2776	1.552	0.0183136
												10.3054	1.56129	0.0184232
												10.3331	1.56019	0.0184103
												10.3609	1.56183	0.0184296
												10.3887	1.56238	0.0184361
												10.4165	1.56676	0.0184877
												10.4442	1.56922	0.0185168
												10.472	1.57634	0.0186008
												10.4998	1.57716	0.0186105
												10.5276	1.58265	0.0186753
												10.5554	1.58402	0.0186915
												10.5831	1.58155	0.0186623
												10.6109	1.58732	0.0187303
												10.6387	1.58347	0.018685
												10.6665	1.59226	0.0187887
												10.6942	1.58485	0.0187012
												10.722	1.59474	0.0188179
												10.7498	1.59831	0.0188601
												10.7776	1.59474	0.0188179
												10.8054	1.60051	0.0188861
												10.8331	1.60162	0.0188991
												10.8609	1.60272	0.0189121
												10.8887	1.60024	0.0188828
												10.9165	1.6063	0.0189543
												10.9443	1.60382	0.0189251
												10.972	1.61098	0.0190096
												10.9998	1.60492	0.0189381
												11.0276	1.61236	0.0190259
												11.0554	1.61347	0.0190389
												11.0831	1.61098	0.0190096
												11.1109	1.61512	0.0190584
												11.1387	1.60768	0.0189706
												11.1665	1.61429	0.0190487
												11.1942	1.61595	0.0190682
												11.222	1.61705	0.0190812
												11.2498	1.61761	0.0190877
												11.2776	1.61623	0.0190715
												11.3054	1.62341	0.0191562
												11.3331	1.62589	0.0191855
												11.3609	1.62147	0.0191334
												11.3887	1.62977	0.0192312
												11.4165	1.62838	0.0192149
												11.4442	1.63226	0.0192606
												11.472	1.62672	0.0191953
												11.4998	1.63364	0.019277
												11.5276	1.63253	0.0192639
												11.5554	1.63392	0.0192802
												11.5831	1.64084	0.0193619
												11.6109	1.63835	0.0193325
												11.6387	1.64001	0.0193521
												11.6665	1.64057	0.0193587
												11.6942	1.64417	0.0194012
												11.722	1.63918	0.0193423
												11.7498	1.64473	0.0194078
												11.7776	1.64334	0.0193914
												11.8054	1.64362	0.0193947
												11.8331	1.64084	0.0193619
												11.8609	1.64195	0.019375
												11.8887	1.64694	0.0194339
												11.9165	1.64805	0.019447
												11.9443	1.65555	0.0195355
												11.972	1.65472	0.0195257
												11.9998	1.65722	0.0195552
												12.0276	1.65639	0.0195454
												12.0554	1.65778	0.0195618
												12.0831	1.65472	0.0195257
												12.1109	1.6575	0.0195585
												12.1387	1.66223	0.0196143
												12.1665	1.66223	0.0196143
												12.1943	1.66223	0.0196143
												12.222	1.65722	0.0195552
												12.2498	1.66167	0.0196077
												12.2776	1.66473	0.0196438
												12.3054	1.66779	0.01968
												12.3331	1.67086	0.0197161
												12.3609	1.66752	0.0196767
												12.3887	1.67002	0.0197063
												12.4165	1.66696	0.0196701
												12.4443	1.66835	0.0196865
												12.472	1.67169	0.019726
												12.4998	1.66974	0.019703
												12.5276	1.67086	0.0197161
												12.5554	1.67448	0.0197589
												12.5831	1.67365	0.019749
												12.6109	1.67281	0.0197391
												12.6387	1.67504	0.0197655
												12.6665	1.67783	0.0197984
												12.6942	1.67476	0.0197622
												12.722	1.67337	0.0197457
												12.7498	1.67616	0.0197786
												12.7776	1.67783	0.0197984
												12.8054	1.67643	0.0197819
												12.8331	1.67225	0.0197326
												12.8609	1.68201	0.0198478
												12.8887	1.68174	0.0198445
												12.9165	1.68285	0.0198577
												12.9442	1.68174	0.0198445
												12.972	1.68034	0.019828
												12.9998	1.68228	0.019851
												13.0276	1.6834	0.0198642
												13.0554	1.6834	0.0198642
												13.0831	1.68117	0.0198378
												13.1109	1.67977	0.0198213
												13.1387	1.68312	0.0198609
												13.1665	1.69067	0.0199499
												13.1942	1.68256	0.0198543
												13.222	1.67837	0.0198048
												13.2498	1.68256	0.0198543
												13.2776	1.68089	0.0198345
												13.3054	1.6848	0.0198806
												13.3331	1.68871	0.0199268
												13.3609	1.6848	0.0198806
												13.3887	1.68564	0.0198905
												13.4165	1.68564	0.0198905
												13.4442	1.6848	0.0198806
												13.472	1.68592	0.0198938
												13.4998	1.68816	0.0199202
												13.5276	1.69095	0.0199532
												13.5554	1.69151	0.0199598
												13.5831	1.69039	0.0199466
												13.6109	1.69039	0.0199466
												13.6387	1.69179	0.0199631
												13.6665	1.69011	0.0199433
												13.6943	1.69151	0.0199598
												13.722	1.68983	0.01994
												13.7498	1.69067	0.0199499
												13.7776	1.68983	0.01994
												13.8054	1.6876	0.0199136
												13.8331	1.68704	0.019907
												13.8609	1.69039	0.0199466
												13.8887	1.69207	0.0199664
												13.9165	1.69151	0.0199598
												13.9443	1.69627	0.020016
												13.972	1.69207	0.0199664
												13.9998	1.69431	0.0199929
												14.0276	1.69207	0.0199664
												14.0554	1.68816	0.0199202
												14.0831	1.69515	0.0200028
												14.1109	1.69095	0.0199532
												14.1387	1.69095	0.0199532
												14.1665	1.69291	0.0199764
												14.1942	1.69403	0.0199896
												14.222	1.69739	0.0200292
												14.2498	1.69823	0.0200391
												14.2776	1.69655	0.0200193
												14.3054	1.69543	0.0200061
												14.3331	1.69907	0.0200491
												14.3609	1.69543	0.0200061
												14.3887	1.69375	0.0199863
												14.4165	1.69571	0.0200094
												14.4443	1.69935	0.0200523
												14.472	1.70383	0.0201052
												14.4998	1.70131	0.0200755
												14.5276	1.70047	0.0200655
												14.5554	1.69991	0.0200589
												14.5831	1.70384	0.0201053
												14.6109	1.70243	0.0200887
												14.6387	1.70607	0.0201317
												14.6665	1.70468	0.0201152
												14.6942	1.70383	0.0201052
												14.722	1.70047	0.0200655
												14.7498	1.70215	0.0200854
												14.7776	1.70495	0.0201184
												14.8054	1.70523	0.0201218
												14.8331	1.70019	0.0200622
												14.8609	1.70607	0.0201317
												14.8887	1.70411	0.0201085
												14.9165	1.69935	0.0200523
												14.9442	1.70299	0.0200953
												14.972	1.70551	0.0201251
												14.9998	1.70607	0.0201317
												15.0276	1.70467	0.0201151
												15.0554	1.7086	0.0201615
												15.0831	1.70776	0.0201515
												15.1109	1.70523	0.0201218
												15.1387	1.70888	0.0201648
												15.1665	1.70916	0.0201681
												15.1942	1.70944	0.0201714
												15.222	1.70579	0.0201284
												15.2498	1.70832	0.0201581
												15.2776	1.70692	0.0201416
												15.3054	1.70607	0.0201317
												15.3331	1.71028	0.0201813
												15.3609	1.70607	0.0201317
												15.3887	1.70551	0.0201251
												15.4165	1.7086	0.0201615
												15.4442	1.70355	0.0201019
												15.472	1.70916	0.0201681
												15.4998	1.71	0.020178
												15.5276	1.71	0.020178
												15.5554	1.70383	0.0201052
												15.5831	1.70832	0.0201581
												15.6109	1.71028	0.0201813
												15.6387	1.70888	0.0201648
												15.6665	1.70776	0.0201515
												15.6942	1.70411	0.0201085
												15.722	1.70832	0.0201581
												15.7498	1.7114	0.0201946
												15.7776	1.7072	0.0201449
												15.8054	1.71028	0.0201813
												15.8331	1.70551	0.0201251
												15.8609	1.71	0.020178
												15.8887	1.7086	0.0201615
												15.9165	1.70776	0.0201515
												15.9442	1.70888	0.0201648
												15.972	1.71	0.020178
												15.9998	1.7072	0.0201449
												16.0276	1.7114	0.0201946
												16.0554	1.71225	0.0202045
												16.0831	1.7086	0.0201615
												16.1109	1.70776	0.0201515
												16.1387	1.71337	0.0202177
												16.1665	1.71056	0.0201846
												16.1942	1.71112	0.0201912
												16.222	1.7114	0.0201946
												16.2498	1.71196	0.0202012
												16.2776	1.71168	0.0201979
												16.3054	1.70944	0.0201714
												16.3331	1.71253	0.0202078
												16.3609	1.71225	0.0202045
												16.3887	1.71505	0.0202376
												16.4165	1.71449	0.020231
												16.4442	1.71309	0.0202144
												16.472	1.70748	0.0201482
												16.4998	1.71505	0.0202376
												16.5276	1.7086	0.0201615
												16.5554	1.71618	0.0202509
												16.5831	1.71281	0.0202111
												16.6109	1.71365	0.0202211
												16.6387	1.71646	0.0202542
												16.6665	1.71421	0.0202277
												16.6942	1.71084	0.0201879
												16.722	1.71337	0.0202177
												16.7498	1.71561	0.0202442
												16.7776	1.71225	0.0202045
												16.8054	1.7114	0.0201946
												16.8331	1.71449	0.020231
												16.8609	1.71281	0.0202111
												16.8887	1.71421	0.0202277
												16.9165	1.71533	0.0202409
												16.9442	1.71365	0.0202211
												16.972	1.70664	0.0201383
												16.9998	1.71674	0.0202575
												17.0276	1.71758	0.0202674
												17.0554	1.71421	0.0202277
												17.0831	1.72039	0.0203006
												17.1109	1.71365	0.0202211
												17.1387	1.71421	0.0202277
												17.1665	1.72039	0.0203006
												17.1942	1.71927	0.0202873
												17.222	1.72011	0.0202973
												17.2498	1.71702	0.0202608
												17.2776	1.71618	0.0202509
												17.3054	1.71337	0.0202177
												17.3331	1.71393	0.0202244
												17.3609	1.71674	0.0202575
												17.3887	1.71589	0.0202476
												17.4165	1.71786	0.0202708
												17.4442	1.71618	0.0202509
												17.472	1.71533	0.0202409
												17.4998	1.7187	0.0202807
												17.5276	1.71421	0.0202277
												17.5554	1.71618	0.0202509
												17.5831	1.71786	0.0202708
												17.6109	1.71561	0.0202442
												17.6387	1.64334	0.0193914
												17.6665	1.63392	0.0192802
												17.6942	1.69823	0.0200391
												17.722	1.95905	0.0231167
												17.7498	2.28683	0.0269845
												17.7776	2.61301	0.0308335
												17.8054	3.07865	0.0363281
												17.8331	3.72887	0.0440007
												17.8609	13.5967	0.160441
												17.8887	5.01054	0.0591244
												17.9165	2.23138	0.0263303
												17.9442	1.89238	0.0223301
												17.972	1.76751	0.0208567
												17.9998	1.72545	0.0203603
												18.0276	1.71955	0.0202907
												18.0554	1.71533	0.0202409
												18.0831	1.71421	0.0202277
												18.1109	1.71505	0.0202376
												18.1387	1.71814	0.0202741
												18.1665	1.7187	0.0202807
												18.1942	1.71702	0.0202608
												18.222	1.72067	0.0203039
												18.2498	1.71618	0.0202509
												18.2776	1.72292	0.0203305
												18.3054	1.72292	0.0203305
												18.3331	1.71927	0.0202873
												18.3609	1.72629	0.0203703
												18.3887	1.72348	0.0203371
												18.4165	1.72376	0.0203404
												18.4442	1.72123	0.0203105
												18.472	1.72489	0.0203537
												18.4998	1.7218	0.0203172
												18.5276	1.7232	0.0203338
												18.5554	1.72039	0.0203006
												18.5831	1.73023	0.0204168
												18.6109	1.72742	0.0203836
												18.6387	1.72517	0.020357
												18.6665	1.72742	0.0203836
												18.6942	1.72489	0.0203537
												18.722	1.72658	0.0203736
												18.7498	1.72348	0.0203371
												18.7776	1.72489	0.0203537
												18.8054	1.72883	0.0204002
												18.8331	1.72433	0.020347
												18.8609	1.72376	0.0203404
												18.8887	1.72995	0.0204134
												18.9165	1.72601	0.020367
												18.9443	1.7277	0.0203869
												18.972	1.72939	0.0204068
												18.9998	1.72489	0.0203537
												19.0276	1.72601	0.020367
												19.0554	1.72911	0.0204035
												19.0831	1.72883	0.0204002
												19.1109	1.72883	0.0204002
												19.1387	1.72714	0.0203802
												19.1665	1.73108	0.0204267
												19.1942	1.73108	0.0204267
												19.222	1.72629	0.0203703
												19.2498	1.72995	0.0204134
												19.2776	1.73192	0.0204367
												19.3054	1.72714	0.0203802
												19.3331	1.7308	0.0204234
												19.3609	1.72995	0.0204134
												19.3887	1.73164	0.0204334
												19.4165	1.72967	0.0204101
												19.4442	1.72995	0.0204134
												19.472	1.72939	0.0204068
												19.4998	1.72573	0.0203636
												19.5276	1.72798	0.0203902
												19.5554	1.73221	0.02044
												19.5831	1.72742	0.0203836
												19.6109	1.72629	0.0203703
												19.6387	1.73446	0.0204666
												19.6665	1.7308	0.0204234
												19.6942	1.73446	0.0204666
												19.722	1.73136	0.0204301
												19.7498	1.73277	0.0204467
												19.7776	1.73249	0.0204433
												19.8054	1.73052	0.0204201
												19.8331	1.72855	0.0203968
												19.8609	1.73333	0.0204533
												19.8887	1.72995	0.0204134
												19.9165	1.72967	0.0204101
												19.9442	1.72911	0.0204035
												19.972	1.73136	0.0204301
												19.9998	1.73108	0.0204267
												20.0276	1.72911	0.0204035
												20.0554	1.72123	0.0203105
												20.0831	1.72376	0.0203404
												20.1109	1.72461	0.0203504
												20.1387	1.72376	0.0203404
												20.1665	1.72461	0.0203504
												20.1942	1.72629	0.0203703
												20.222	1.72883	0.0204002
												20.2498	1.72517	0.020357
												20.2776	1.73418	0.0204633
												20.3054	1.73418	0.0204633
												20.3331	1.73277	0.0204467
												20.3609	1.73615	0.0204866
												20.3887	1.73784	0.0205065
												20.4165	1.73192	0.0204367
												20.4442	1.73671	0.0204932
												20.472	1.73446	0.0204666
												20.4998	1.74038	0.0205365
												20.5276	1.73812	0.0205098
												20.5554	1.74094	0.0205431
												20.5831	1.74179	0.0205531
												20.6109	1.74292	0.0205664
												20.6387	1.74292	0.0205664
												20.6665	1.73699	0.0204965
												20.6942	1.73812	0.0205098
												20.722	1.74292	0.0205664
												20.7498	1.74179	0.0205531
												20.7776	1.74094	0.0205431
												20.8054	1.74066	0.0205398
												20.8331	1.74263	0.0205631
												20.8609	1.7463	0.0206064
												20.8887	1.74546	0.0205964
												20.9165	1.74489	0.0205897
												20.9442	1.74348	0.0205731
												20.972	1.74094	0.0205431
												35.2981	2.22097	0.0262074
												35.3259	2.21149	0.0260956
												35.3537	2.20233	0.0259875
												35.3815	2.19471	0.0258975
												35.4093	2.19623	0.0259155
												35.437	2.18831	0.0258221
												35.4648	2.18892	0.0258292
												35.4926	2.20172	0.0259803
												35.5204	2.19684	0.0259227
												35.5481	2.16674	0.0255675
												35.5759	2.18527	0.0257862
												35.6037	2.18435	0.0257754
												35.6315	2.18618	0.0257969
												35.6592	2.1719	0.0256284
												35.687	2.17706	0.0256893
												35.7148	2.16613	0.0255604
												35.7426	2.16522	0.0255496
												35.7704	2.17008	0.0256069
												35.7981	2.16613	0.0255604
												35.8259	2.15371	0.0254138
												35.8537	2.16431	0.0255389
												35.8815	2.16704	0.0255711
												35.9092	2.15492	0.0254281
												35.937	2.14797	0.025346
												35.9648	2.14525	0.0253139
												35.9926	2.14313	0.0252889
												36.0204	2.15613	0.0254424
												36.0481	2.15492	0.0254281
												36.0759	2.13981	0.0252497
												36.1037	2.14676	0.0253317
												36.1315	2.12564	0.0250825
												36.1593	2.13287	0.0251679
												36.187	2.14464	0.0253068
												36.2148	2.13317	0.0251714
												36.2426	2.14071	0.0252604
												36.2704	2.12805	0.0251109
												36.2981	2.10459	0.0248342
												36.3259	2.12353	0.0250576
												36.3537	2.1103	0.0249015
												36.3815	2.1148	0.0249547
												36.4092	2.10579	0.0248483
												36.437	2.0929	0.0246962
												36.4648	2.09979	0.0247775
												36.4926	2.09619	0.0247351
												36.5204	2.10249	0.0248094
												36.5481	2.1106	0.024905
												36.5759	2.08691	0.0246255
												36.6037	2.07973	0.0245409
												36.6315	2.08422	0.0245938
												36.6593	2.09679	0.0247422
												36.687	2.08871	0.0246467
												36.7148	2.08153	0.024562
												36.7426	2.07048	0.0244316
												36.7704	2.07525	0.024488
												36.7981	2.08093	0.024555
												36.8259	2.07764	0.0245162
												36.8537	2.07167	0.0244457
												36.8815	2.05558	0.0242558
												36.9093	2.07406	0.0244739
												36.937	2.06243	0.0243366
												36.9648	2.05736	0.0242769
												36.9926	2.04992	0.0241891
												37.0204	2.07048	0.0244316
												37.0481	2.05766	0.0242804
												37.0759	2.05528	0.0242523
												37.1037	2.02915	0.0239439
												37.1315	2.03359	0.0239964
												37.1592	2.03715	0.0240384
												37.187	2.04576	0.02414
												37.2148	2.03448	0.0240069
												37.2426	2.01465	0.0237728
												37.2704	2.02382	0.023881
												37.2981	2.02322	0.023874
												37.3259	2.02885	0.0239404
												37.3537	2.00608	0.0236717
												37.3815	2.00165	0.0236195
												37.4093	2.01435	0.0237693
												37.437	2.02382	0.023881
												37.4648	1.99546	0.0235465
												37.4926	2.00756	0.0236892
												37.5204	1.99517	0.023543
												37.5481	1.98899	0.02347
												37.5759	1.97517	0.023307
												37.6037	1.99105	0.0234944
												37.6315	1.98987	0.0234805
												37.6593	1.9652	0.0231893
												37.687	1.96022	0.0231306
												37.7148	1.98105	0.0233763
												37.7426	1.98781	0.0234562
												37.7704	1.974	0.0232932
												37.7981	1.95085	0.0230201
												37.8259	1.95436	0.0230615
												37.8537	1.9649	0.0231859
												37.8815	1.96373	0.023172
												37.9092	1.96608	0.0231997
												37.937	1.94793	0.0229856
												37.9648	1.95319	0.0230477
												37.9926	1.93888	0.0228788
												38.0204	1.94326	0.0229304
												38.0481	1.94939	0.0230028
												38.0759	1.92751	0.0227446
												38.1037	1.9453	0.0229546
												38.1315	1.91442	0.0225902
												38.1593	1.93188	0.0227962
												38.187	1.93421	0.0228237
												38.2148	1.94063	0.0228994
												38.2426	1.92227	0.0226828
												38.2704	1.92169	0.0226759
												38.2981	1.91558	0.0226039
												38.3259	1.90368	0.0224634
												38.3537	1.906	0.0224908
												38.3815	1.89035	0.0223062
												38.4092	1.90426	0.0224703
												38.437	1.90223	0.0224463
												38.4648	1.89933	0.0224121
												38.4926	1.88775	0.0222754
												38.5204	1.90629	0.0224942
												38.5481	1.91733	0.0226245
												38.5759	1.8892	0.0222925
												38.6037	1.89412	0.0223506
												38.6315	1.8837	0.0222277
												38.6592	1.87302	0.0221016
												38.687	1.87215	0.0220914
												38.7148	1.88486	0.0222413
												38.7426	1.86984	0.0220641
												38.7704	1.85659	0.0219078
												38.7981	1.85918	0.0219384
												38.8259	1.871	0.0220778
												38.8537	1.84366	0.0217552
												38.8815	1.85199	0.0218535
												38.9092	1.82589	0.0215455
												38.937	1.84912	0.0218196
												38.9648	1.85343	0.0218705
												38.9926	1.8342	0.0216435
												39.0204	1.83248	0.0216232
												39.0481	1.82532	0.0215388
												39.0759	1.8319	0.0216165
												39.1037	1.82503	0.0215354
												39.1315	1.82503	0.0215354
												39.1593	1.8136	0.0214004
												39.187	1.8216	0.0214949
												39.2148	1.80789	0.0213331
												39.2426	1.80275	0.0212725
												39.2704	1.80561	0.0213061
												39.2981	1.81511	0.0214183
												39.3259	1.78056	0.0210106
												39.3537	1.80226	0.0212667
												39.3815	1.78852	0.0211045
												39.4092	1.80504	0.0212994
												39.437	1.79962	0.0212355
												39.4648	1.78255	0.0210341
												39.4926	1.78738	0.0210911
												39.5204	1.77233	0.0209135
												39.5481	1.77432	0.020937
												39.5759	1.7644	0.0208199
												39.6037	1.7695	0.0208801
												39.6315	1.76355	0.0208099
												39.6592	1.76751	0.0208567
												39.687	1.7729	0.0209202
												39.7148	1.78141	0.0210207
												39.7426	1.7763	0.0209604
												39.7704	1.75393	0.0206964
												39.7981	1.7277	0.0203869
												39.8259	1.77347	0.0209269
												39.8537	1.74038	0.0205365
												39.8815	1.76072	0.0207765
												39.9092	1.73784	0.0205065
												39.937	1.7187	0.0202807
												39.9648	1.72348	0.0203371
												39.9926	1.73277	0.0204467
												40.0204	1.71898	0.020284
												40.0481	1.70804	0.0201548
												40.0759	1.70355	0.0201019
												40.1037	1.7086	0.0201615
												40.1315	1.71505	0.0202376
												40.1593	1.73559	0.0204799
												40.187	1.74771	0.020623
												40.2148	1.72433	0.020347
												40.2426	1.7218	0.0203172
												40.2704	1.69599	0.0200127
												40.2981	1.70383	0.0201052
												40.3259	1.69487	0.0199995
												40.3537	1.68956	0.0199368
												40.3815	1.69207	0.0199665
												40.4092	1.69487	0.0199995
												40.437	1.66111	0.0196011
												40.4648	1.66084	0.0195979
												40.4926	1.67002	0.0197063
												40.5204	1.6809	0.0198346
												40.5481	1.64861	0.0194536
												40.5759	1.68537	0.0198873
												40.6037	1.68034	0.019828
												40.6315	1.67448	0.0197589
												40.6593	1.62755	0.0192051
												40.687	1.63004	0.0192345
												40.7148	1.66696	0.0196701
												40.7426	1.65222	0.0194962
												40.7704	1.64389	0.0193979
												40.7981	1.62977	0.0192312
												40.8259	1.6154	0.0190617
												40.8537	1.62811	0.0192117
												40.8815	1.6353	0.0192966
												40.9092	1.61485	0.0190552
												40.937	1.63392	0.0192802
												40.9648	1.59969	0.0188763
												40.9926	1.61374	0.0190422
												41.0204	1.61981	0.0191138
												41.0481	1.59639	0.0188374
												41.0759	1.59666	0.0188406
												41.1037	1.58814	0.0187401
												41.1315	1.61098	0.0190096
												41.1592	1.58869	0.0187465
												41.187	1.60299	0.0189153
												41.2148	1.59501	0.0188211
												41.2426	1.59061	0.0187692
												41.2704	1.54791	0.0182653
												41.2981	1.57333	0.0185653
												41.3259	1.58238	0.018672
												41.3537	1.54954	0.0182846
												41.3815	1.56566	0.0184748
												41.4093	1.55282	0.0183232
												41.437	1.56648	0.0184845
												41.4648	1.56566	0.0184748
												41.4926	1.52422	0.0179859
												41.5204	1.5264	0.0180115
												41.5481	1.54791	0.0182653
												41.5759	1.52015	0.0179378
												41.6037	1.51527	0.0178802
												41.6315	1.55992	0.018407
												41.6592	1.54327	0.0182106
												41.687	1.53646	0.0181302
												41.7148	1.51717	0.0179026
												41.7426	1.51988	0.0179346
												41.7704	1.53456	0.0181078
												41.7981	1.4637	0.0172717
												41.8259	1.47554	0.0174114
												41.8537	1.47716	0.0174304
												41.8815	1.4928	0.0176151
												41.9092	1.43555	0.0169395
												41.937	1.49605	0.0176533
												41.9648	1.4928	0.0176151
												41.9926	1.51418	0.0178674
												42.0204	1.4594	0.017221
												42.0481	1.46639	0.0173034
												42.0759	1.45511	0.0171703
												42.1037	1.4586	0.0172114
												42.1315	1.4715	0.0173637
												42.1593	1.46962	0.0173415
												42.187	1.4476	0.0170817
												42.2148	1.50254	0.0177299
												42.2426	1.43181	0.0168953
												42.2704	1.45242	0.0171386
												42.2981	1.41926	0.0167473
												42.3259	1.44063	0.0169995
												42.3537	1.40275	0.0165524
												42.3815	1.44385	0.0170374
												42.4093	1.43074	0.0168827
												42.437	1.40089	0.0165305
												42.4648	1.41606	0.0167095
												42.4926	1.38841	0.0163832
												42.5204	1.40647	0.0165964
												42.5481	1.41766	0.0167284
												42.5759	1.4409	0.0170026
												42.6037	1.44197	0.0170153
												42.6315	1.38258	0.0163144
												42.6593	1.40807	0.0166152
												42.687	1.35614	0.0160025
												42.7148	1.3985	0.0165023
												42.7426	1.44063	0.0169995
												42.7704	1.39531	0.0164646
												42.7981	1.38205	0.0163081
												42.8259	1.36696	0.0161302
												42.8537	1.39504	0.0164615
												42.8815	1.39133	0.0164177
												42.9092	1.32301	0.0156115
												42.937	1.35192	0.0159527
												42.9648	1.36696	0.0161302
												42.9926	1.33561	0.0157602
												43.0204	1.29841	0.0153213
												43.0481	1.30939	0.0154508
												43.0759	1.33298	0.0157291
												43.1037	1.34165	0.0158315
												43.1315	1.30416	0.0153891
												43.1593	1.29972	0.0153367
												43.187	1.30129	0.0153552
												43.2148	1.3175	0.0155465
												43.2426	1.3314	0.0157106
												43.2704	1.2945	0.0152751
												43.2981	1.29241	0.0152505
												43.3259	1.26821	0.0149649
												43.3537	1.29241	0.0152505
												43.3815	1.26406	0.0149159
												43.4092	1.24851	0.0147324
												43.437	1.27185	0.0150078
												43.4648	1.27965	0.0150998
												43.4926	1.2958	0.0152905
												43.5204	1.29189	0.0152443
												43.5481	1.207	0.0142426
												43.5759	1.23946	0.0146256
												43.6037	1.26432	0.0149189
												43.6315	1.22011	0.0143974
												43.6593	1.22862	0.0144977
												43.687	1.15382	0.0136151
												43.7148	1.11553	0.0131632
												43.7426	1.09434	0.0129132
												43.7704	1.13071	0.0133424
												43.7981	1.14416	0.0135011
												43.8259	1.18086	0.0139341
												43.8537	1.19571	0.0141093
												43.8815	1.2034	0.0142002
												43.9093	1.15611	0.0136421
												43.937	1.11907	0.013205
												43.9648	1.12894	0.0133215
												43.9926	1.11452	0.0131513
												44.0204	1.11073	0.0131066
												44.0481	1.09207	0.0128865
												44.0759	1.09711	0.0129459
												44.1037	1.10391	0.0130262
												44.1315	1.08754	0.012833
												44.1592	1.08076	0.0127529
												44.187	1.11527	0.0131602
												44.2148	1.08805	0.012839
												44.2426	1.08026	0.012747
												44.2704	1.10543	0.013044
												44.2981	1.12362	0.0132587
												44.3259	1.06471	0.0125635
												44.3537	1.01881	0.012022
												44.3815	1.03722	0.0122393
												44.4092	1.0477	0.0123629
												44.437	1.00616	0.0118727
												44.4648	1.09484	0.0129191
												44.4926	1.0512	0.0124041
												44.5204	1.00071	0.0118084
												44.5481	0.965168	0.011389
												44.5759	1.04346	0.0123128
												44.6037	1.01832	0.0120161
												44.6315	1.00244	0.0118288
												44.6593	1.01608	0.0119898
												44.687	0.985378	0.0116275
												44.7148	0.984885	0.0116216
												44.7426	0.990072	0.0116828
												44.7704	0.984638	0.0116187
												44.7981	0.989083	0.0116712
												44.8259	0.983403	0.0116042
												44.8537	0.955827	0.0112788
												44.8815	0.899134	0.0106098
												44.9093	0.87052	0.0102721
												44.937	0.887719	0.0104751
												44.9648	0.910086	0.010739
												44.9926	0.904729	0.0106758
												45.0204	0.883354	0.0104236
												45.0481	0.959021	0.0113164
												45.0759	0.917642	0.0108282
												45.1037	0.886021	0.010455
												45.1315	0.928386	0.010955
												45.1592	0.859405	0.010141
												45.187	0.852168	0.0100556
												45.2148	0.838444	0.00989364
												45.2426	0.832435	0.00982273
												45.2704	0.840849	0.00992202
												45.2981	0.839165	0.00990215
												45.3259	0.789364	0.0093145
												45.3537	0.814448	0.00961049
												45.3815	0.838684	0.00989647
												45.4093	0.830034	0.0097944
												45.437	0.780314	0.00920771
												45.4648	0.770329	0.00908988
												45.4926	0.799623	0.00943555
												45.5204	0.765581	0.00903385
												45.5481	1.16554	0.0137533
												45.5759	1.61871	0.0191008
												45.6037	1.69515	0.0200028
												45.6315	1.67281	0.0197391
												45.6592	1.66167	0.0196077
												45.687	1.69627	0.020016
												45.7148	1.73699	0.0204965
												45.7426	1.66807	0.0196833
												45.7704	1.7384	0.0205132
												45.7981	1.73756	0.0205032
												45.8259	1.70607	0.0201317
												45.8537	1.70607	0.0201317
												45.8815	1.68704	0.0199071
												45.9093	1.71112	0.0201912
												45.937	1.62783	0.0192084
												45.9648	1.75761	0.0207398
												45.9926	1.70832	0.0201581
												46.0204	1.66223	0.0196143
												46.0481	1.55336	0.0183297
												46.0759	1.6223	0.0191432
												46.1037	1.64278	0.0193848
												46.1315	1.59501	0.0188211
												46.1592	1.59474	0.0188179
												46.187	1.59254	0.0187919
												46.2148	1.61623	0.0190715
												46.2426	1.59144	0.018779
												46.2704	1.55828	0.0183877
												46.2981	1.56867	0.0185103
												46.3259	1.51554	0.0178834
												46.3537	1.4974	0.0176693
												46.3815	1.53592	0.0181238
												46.4092	1.57352	0.0185675
												46.437	1.55928	0.0183995
												46.4648	1.51921	0.0179267
												46.4926	1.5388	0.0181579
												46.5204	1.54316	0.0182093
												46.5481	1.39696	0.0164841
												46.5759	1.48201	0.0174877
												46.6037	1.49767	0.0176725
												46.6315	1.49496	0.0176406
												46.6593	1.46343	0.0172685
												46.687	1.42353	0.0167976
												46.7148	1.40441	0.016572
												46.7426	1.36197	0.0160713
												46.7704	1.37255	0.0161961
												46.7981	1.3943	0.0164527
												46.8259	1.39988	0.0165186
												46.8537	1.3588	0.0160339
												46.8815	1.27493	0.0150441
												46.9093	1.38342	0.0163243
												46.937	1.3099	0.0154568
												46.9648	1.2817	0.015124
												46.9926	1.37547	0.0162305
												47.0204	1.28978	0.0152194
												47.0481	1.31435	0.0155094
												47.0759	1.32301	0.0156115
												47.1037	1.28456	0.0151578
												47.1315	1.25286	0.0147837
												47.1592	1.24716	0.0147164
												47.187	1.18382	0.0139691
												47.2148	1.19074	0.0140507
												47.2426	1.17257	0.0138363
												47.2704	1.10955	0.0130927
												47.2981	1.17308	0.0138423
												47.3259	1.15879	0.0136737
												47.3537	1.12068	0.0132241
												47.3815	1.08988	0.0128606
												47.4093	1.09416	0.0129111
												47.437	1.09038	0.0128665
												47.4648	1.15904	0.0136767
												47.4926	1.12245	0.013245
												47.5204	1.0987	0.0129647
												47.582	1.13742	0.0134215
												47.6654	0.956774	0.0112899
												47.7487	0.863157	0.0101853
												47.832	0.901486	0.0106375
												47.9154	0.885443	0.0104482
												47.9987	0.907331	0.0107065
												48.082	0.848671	0.0100143
												48.1654	0.760166	0.00896996
												48.2487	0.750919	0.00886085
												48.332	0.643705	0.00759571
												48.4154	0.609657	0.00719395
												48.4987	0.542873	0.0064059
												48.582	0.468112	0.00552372
												48.6654	1.45011	0.0171113
												48.7487	1.30022	0.0153426
												48.832	1.39191	0.0164245
												48.9154	1.37044	0.0161711
												48.9987	1.283	0.0151394
												49.082	1.26349	0.0149092
												49.1654	1.18356	0.0139661
												49.2487	1.0425	0.0123014
												49.332	1.10703	0.0130629
												49.4154	0.98512	0.0116244
												49.4987	0.91489	0.0107957
												49.582	0.806155	0.00951263
												49.6654	0.889085	0.0104912
												49.7487	0.812141	0.00958326
												49.832	1.64719	0.0194368
												49.9154	1.61727	0.0190838
												49.9987	1.57324	0.0185643
												50.082	1.47781	0.0174382
												50.1654	1.43269	0.0169058
												50.2487	1.40441	0.016572
												50.332	1.28482	0.0151609
												50.4154	1.1293	0.0133257
												50.4987	1.11916	0.0132061
												50.582	1.0079	0.0118932
												50.6654	0.835665	0.00986085
												50.7487	0.763964	0.00901478
												50.832	0.635811	0.00750257
												50.9154	0.733889	0.00865989
												50.9987	0.517612	0.00610782
												51.082	0.395915	0.0046718
												51.1654	0.390367	0.00460633
												51.2487	0.349925	0.00412911
												51.332	0.23125	0.00272875
												51.4154	0.107721	0.00127111
												51.4987	0.218757	0.00258133
												51.582	0.198807	0.00234592
												51.6654	0.0864987	0.00102069
												51.7487	0.0268532	0.000316868
												51.832	0.143632	0.00169486
												51.9154	1.57845	0.0186257
												51.9987	1.65191	0.0194926
												52.082	1.77012	0.0208874
												52.1654	1.43724	0.0169594
												52.2487	1.56804	0.0185028
												52.332	1.39855	0.0165029
												52.4154	1.15191	0.0135925
												52.4987	1.0146	0.0119723
												52.582	1.01212	0.011943
												52.6654	1.0017	0.0118201
												52.7487	2.57226	0.0303527
												52.832	2.62541	0.0309799
												52.9154	2.63885	0.0311385
												52.9987	2.3545	0.0277831
												53.082	2.23298	0.0263492
												53.1654	2.10938	0.0248907
												53.2487	2.07462	0.0244805
												53.332	1.97184	0.0232677
												53.4154	1.57434	0.0185772
												53.4987	1.52492	0.0179941
												53.582	1.44313	0.017029
												53.6654	1.33404	0.0157416
												53.7487	1.1125	0.0131274
												53.832	1.16401	0.0137353
												53.9154	1.1259	0.0132856
												53.9987	0.600755	0.00708891
												54.082	0.642139	0.00757724
												54.1654	1.34455	0.0158657
												54.2487	2.18344	0.0257646
												54.332	2.24335	0.0264716
												54.4154	1.86177	0.0219689
												54.4987	1.62424	0.019166
												54.582	1.60878	0.0189836
												54.6654	1.16477	0.0137443
												54.7487	1.09056	0.0128686
												54.832	1.09207	0.0128865
												54.9154	0.964184	0.0113774
												54.9987	0.580754	0.0068529
												55.082	0.568605	0.00670954
												55.1654	0.501018	0.00591202
												55.2487	1.92023	0.0226588
												55.332	1.71898	0.020284
												55.4154	1.36961	0.0161614
												55.4987	1.32668	0.0156548
												55.582	1.00789	0.0118931
												55.6654	0.938415	0.0110733
												55.7487	0.640515	0.00755807
												55.832	0.522546	0.00616604
												55.9154	0.179392	0.00211683
												55.9987	0.31909	0.00376526
												56.082	0.697885	0.00823504
												56.1654	1.36829	0.0161458
												56.2487	1.0213	0.0120513
												56.332	1.74768	0.0206226
												56.4154	1.27552	0.0150512
												56.4987	0.988836	0.0116683
												56.582	0.802728	0.00947219
												56.6654	0.464278	0.00547848
												56.7487	1.99517	0.023543
												56.832	2.76614	0.0326404
												56.9154	0.0561206	0.000662223
												56.9987	0.0538295	0.000635188
												57.082	0.221547	0.00261425
												57.1654	0.20953	0.00247246
												57.2487	0.648873	0.0076567
												57.332	0.251706	0.00297013
												57.4154	1.11123	0.0131125
												57.4987	0.681499	0.00804169
												57.582	1.10745	0.0130679
												57.6654	1.04595	0.0123423
												57.7487	0.901323	0.0106356
												57.832	0.40507	0.00477983
												57.9154	1.27835	0.0150845
												57.9987	1.0537	0.0124336
												58.082	1.03448	0.0122069
												58.1654	1.53728	0.0181399
												58.2487	1.78198	0.0210274
												58.332	2.83924	0.0335031
												58.4154	2.54932	0.030082
												58.4987	2.44104	0.0288043
												58.582	2.4366	0.0287519
												58.6654	2.42614	0.0286284
												58.7487	2.19836	0.0259407
												58.832	2.36689	0.0279293
												58.9154	2.20385	0.0260055
												58.9987	1.78141	0.0210207
												59.082	1.80532	0.0213028
												59.1654	1.86465	0.0220029
												59.2487	1.96022	0.0231306
												59.332	1.81903	0.0214645
												59.4154	2.04695	0.024154
												59.4987	1.84998	0.0218298
												59.582	1.71505	0.0202376
												59.6654	1.72011	0.0202973
												59.7487	1.62285	0.0191497
												59.832	1.91994	0.0226553
												59.9154	1.87013	0.0220676
												59.9987	1.82904	0.0215827
												60.082	1.78823	0.0211012
												60.1654	1.95934	0.0231202
												60.2487	1.94822	0.022989
												60.332	2.0049	0.0236578
												60.4154	2.27693	0.0268678
												60.4987	2.03181	0.0239754
												60.582	2.30356	0.027182
												60.6654	2.0416	0.0240909
												60.7487	2.39297	0.0282371
												60.832	2.44199	0.0288155
												60.9154	2.39171	0.0282222
												60.9987	2.2924	0.0270503
												61.082	2.31113	0.0272713
												61.1654	2.50199	0.0295235
												61.2487	2.4632	0.0290657
												61.332	2.49142	0.0293987
												61.4154	2.5512	0.0301042
												61.4987	2.70283	0.0318934
												61.582	2.63427	0.0310844
												61.6654	2.78761	0.0328938
												61.7487	2.82131	0.0332914
												61.832	2.81962	0.0332715
												61.9154	2.82333	0.0333153
												61.9987	2.79063	0.0329295
												62.082	2.88038	0.0339885
												62.1654	3.10406	0.0366279
												62.2487	2.85961	0.0337434
												62.332	3.09946	0.0365737
												62.4154	3.13206	0.0369583
												62.4987	2.95935	0.0349203
												62.582	2.97249	0.0350754
												62.6654	3.0857	0.0364112
												62.7487	3.20386	0.0378055
												62.832	2.97596	0.0351163
												62.9154	3.02919	0.0357444
												62.9987	1.57278	0.0185588
												63.082	1.53809	0.0181495
												63.1654	1.44492	0.01705
												63.2487	1.48282	0.0174972
												63.332	1.66223	0.0196143
												63.4154	1.58979	0.0187595
												63.4987	1.63752	0.0193227
												63.582	1.3314	0.0157106
												63.6654	1.59144	0.018779
												63.7487	1.32878	0.0156796
												63.832	1.49821	0.0176789
												63.9154	1.45725	0.0171956
												63.9987	1.50524	0.0177619
												64.082	1.39345	0.0164427
												64.1654	1.32694	0.0156579
												64.2487	1.09182	0.0128835
												64.332	1.19622	0.0141154
												64.4154	1.34823	0.0159092
												64.4987	1.27627	0.0150599
												64.582	1.47285	0.0173796
												64.6654	1.3107	0.0154662
												64.7487	1.43288	0.0169079
												64.832	1.24256	0.0146622
												64.9154	1.41233	0.0166655
												64.9987	1.36908	0.0161551
												65.082	1.25654	0.0148271
												65.1654	1.0542	0.0124395
												65.2487	1.2511	0.0147629
												65.332	1.32274	0.0156084
												65.4154	1.38258	0.0163144
												65.4987	1.29893	0.0153274
												65.582	1.07047	0.0126315
												65.6654	1.18086	0.0139341
												65.7487	1.16477	0.0137443
												65.832	1.21728	0.0143639
												65.9154	1.10164	0.0129994
												65.9987	1.18649	0.0140005
												66.082	1.00913	0.0119078
												66.1654	0.930097	0.0109751
												66.2487	1.01558	0.0119839
												66.332	0.952144	0.0112353
												66.4154	0.977729	0.0115372
												66.4987	1.13477	0.0133903
												66.582	1.10064	0.0129875
												66.6654	0.868102	0.0102436
												66.7487	0.929852	0.0109723
												66.832	0.931564	0.0109925
												66.9154	0.555112	0.00655032
												66.9987	0.883839	0.0104293
												67.082	0.570895	0.00673656
												67.1654	0.558539	0.00659076
												67.2487	0.661434	0.00780492
												67.332	0.658873	0.0077747
												67.4154	0.491979	0.00580536
												67.4987	0.459787	0.00542548
												67.582	0.529817	0.00625184
												67.6654	0.535731	0.00632163
												67.7487	0.459338	0.00542019
												67.832	0.455972	0.00538047
												67.9154	0.527771	0.0062277
												67.9987	0.279862	0.00330237
												68.082	0.20953	0.00247246
												68.1654	0.324561	0.00382982
												68.2487	0.292035	0.00344602
												68.332	0.201805	0.0023813
												68.4154	0.07135	0.00084193
												68.4987	0.29639	0.0034974
												68.582	0.231236	0.00272859
												68.6654	0.0921639	0.00108753
												68.7487	1.01982	0.0120339
												68.832	1.02231	0.0120633
												68.9154	1.06646	0.0125842
												68.9987	1.176	0.0138768
												69.082	1.0527	0.0124218
												69.1654	1.10122	0.0129944
												69.2487	1.32012	0.0155774
												69.332	1.05825	0.0124873
												69.4154	1.21231	0.0143053
												69.4987	0.890057	0.0105027
												69.582	1.12854	0.0133167
												69.6654	1.24534	0.0146951
												69.7487	1.07906	0.012733
												69.832	1.21926	0.0143873
												69.9154	1.02131	0.0120515
												69.9987	1.01212	0.011943
												70.082	0.999966	0.0117996
												70.1654	0.811183	0.00957195
												70.2487	1.04499	0.0123309
												70.332	1.07731	0.0127122
												70.4154	0.816934	0.00963982
												70.4987	1.0625	0.0125375
												70.582	0.878893	0.0103709
												70.6654	0.948667	0.0111943
												70.7487	1.14555	0.0135175
												70.832	0.899539	0.0106146
												70.9154	0.765435	0.00903214
												70.9987	0.701619	0.0082791
												71.082	0.882921	0.0104185
												71.1654	0.585236	0.00690578
												71.2487	0.934883	0.0110316
												71.332	0.789021	0.00931044
												71.4154	0.732017	0.0086378
												71.4987	0.939542	0.0110866
												71.582	0.190224	0.00224464
												71.6654	0.750242	0.00885285
												71.7487	0.211879	0.00250018
												71.832	0.206082	0.00243176
												71.9154	0.329375	0.00388662
												71.9987	0.19579	0.00231032
												72.082	0.179962	0.00212355
												72.1654	0.363733	0.00429204
												72.2487	0.255886	0.00301946
												72.332	0.31162	0.00367712
												72.4154	0.288255	0.00340141
												72.4987	0.173132	0.00204295
												72.582	0.963879	0.0113738
												72.6654	0.936599	0.0110519
												72.7487	0.997487	0.0117703
												72.832	0.881707	0.0104041
												72.9154	1.09197	0.0128853
												72.9987	0.842277	0.00993886
												73.082	0.799057	0.00942887
												73.1654	0.703734	0.00830406
												73.2487	0.86232	0.0101754
												73.332	0.900675	0.010628
												73.4154	0.701619	0.0082791
												73.4987	0.559876	0.00660654
												73.582	0.533602	0.00629651
												73.6654	0.66228	0.00781491
												73.7487	0.546609	0.00644999
												73.832	0.645506	0.00761697
												73.9154	0.541586	0.00639071
												73.9987	1.19782	0.0141343
												74.082	0.467901	0.00552123
												74.1654	0.531779	0.006275
												74.2487	0.750479	0.00885565
												74.332	0.471731	0.00556642
												74.4154	0.75285	0.00888363
												74.4987	0.735799	0.00868243
												74.582	0.405651	0.00478668
												74.6654	0.353358	0.00416963
												74.7487	0.555298	0.00655252
												74.832	0.499294	0.00589167
												74.9154	1.29471	0.0152776
												74.9987	1.34221	0.015838
												75.082	1.51855	0.0179189
												75.1654	1.37312	0.0162028
												75.2487	1.23442	0.0145661
												75.332	1.3816	0.0163029
												75.4154	1.10762	0.0130699
												75.4987	1.26969	0.0149823
												75.582	1.39967	0.0165162
												75.6654	1.08265	0.0127753
												75.7487	1.07184	0.0126477
												75.832	1.34458	0.015866
												75.9154	1.32905	0.0156828
												75.9987	1.08492	0.012802
												76.082	0.00719344	8.48826e-05
												76.1654	0.88535	0.0104471
												76.2487	1.01263	0.011949
												76.332	1.17168	0.0138259
												76.4154	1.31671	0.0155371
												76.4987	1.40633	0.0165947
												76.582	1.44242	0.0170206
												76.6654	1.61446	0.0190506
												76.7487	1.80519	0.0213012
												76.832	1.85826	0.0219275
												76.9154	1.83669	0.0216729
												76.9987	1.89063	0.0223094
												77.082	1.85797	0.0219241
												77.1654	1.84071	0.0217204
												77.2487	1.67417	0.0197553
												77.332	1.97586	0.0233151
												77.4154	1.73649	0.0204906
												77.4987	1.92754	0.022745
												77.582	1.55398	0.018337
												77.6654	1.83009	0.021595
												77.7487	1.99854	0.0235828
												77.832	2.00297	0.023635
												77.9154	2.2985	0.0271223
												77.9987	1.92142	0.0226728
												78.082	2.16587	0.0255573
												78.1654	2.08326	0.0245825
												78.2487	1.95063	0.0230174
												78.332	2.2515	0.0265677
												78.4154	2.48194	0.0292869
												78.4987	2.13197	0.0251572
												78.582	2.27023	0.0267887
												78.6654	2.32763	0.027466
												78.7487	2.26498	0.0267268
												78.832	2.50768	0.0295906
												78.9154	1.7602	0.0207703
												78.9987	1.73139	0.0204304
												79.082	1.78204	0.0210281
												79.1654	1.83315	0.0216311
												79.2487	1.79428	0.0211725
												79.332	1.93905	0.0228808
												79.4154	1.96421	0.0231777
												79.4987	2.05881	0.0242939
												79.582	1.82083	0.0214858
												79.6654	2.06775	0.0243995
												79.7487	2.06119	0.024322
												79.832	2.23728	0.0263999
												79.9154	2.1917	0.025862
												79.9987	2.2505	0.0265559
												80.082	2.21521	0.0261395
												80.1654	2.28352	0.0269455
												80.2487	2.37929	0.0280756
												80.332	2.40829	0.0284178
												80.4154	2.59927	0.0306714
												80.4987	2.34855	0.0277129
												80.582	2.18074	0.0257327
												80.6654	2.35544	0.0277942
												80.7487	2.45778	0.0290018
												80.832	2.60351	0.0307214
												80.9154	2.43045	0.0286793
												80.9987	2.52827	0.0298336
												81.082	2.48972	0.0293787
												81.1654	2.04511	0.0241323
												81.2487	1.92476	0.0227121
												81.332	2.18287	0.0257578
												81.4154	2.36704	0.027931
												81.4987	2.20176	0.0259808
												81.582	2.34261	0.0276428
												81.6654	2.30802	0.0272346
												81.7487	2.18408	0.0257722
												81.832	2.31466	0.027313
												81.9154	2.56151	0.0302258
												81.9987	2.43571	0.0287414
												82.082	2.65265	0.0313013
												82.1654	2.55308	0.0301264
												82.2487	2.68168	0.0316439
												82.332	3.0401	0.0358732
												82.4154	3.12263	0.0368471
												82.4987	3.07101	0.036238
												82.582	2.85269	0.0336618
												82.6654	2.43921	0.0287827
												82.7487	2.65825	0.0313673
												82.832	2.82995	0.0333935
												82.9154	2.54532	0.0300347
												82.9987	2.59141	0.0305787
												83.082	2.68632	0.0316985
												83.1654	2.74885	0.0324364
												83.2487	2.77901	0.0327924
												83.332	2.92141	0.0344726
												83.4154	2.90527	0.0342822
												83.4987	3.089	0.0364502
												83.582	3.10314	0.036617
												83.6654	2.9369	0.0346554
												83.7487	2.98742	0.0352516
												83.832	3.26262	0.038499
												83.9154	3.33086	0.0393042
												83.9987	3.50829	0.0413978
												84.082	3.59065	0.0423696
												84.1654	3.47331	0.040985
												84.2487	3.32976	0.0392912
												84.332	3.62973	0.0428308
												84.4154	3.56587	0.0420772
												84.4987	3.51093	0.0414289
												84.582	3.55484	0.0419471
												84.6654	3.6025	0.0425095
												84.7487	3.50489	0.0413577
												84.832	3.6702	0.0433084
												84.9154	3.62473	0.0427718
												84.9987	3.3496	0.0395253
												85.082	3.46543	0.0408921
												85.1654	3.40614	0.0401925
												85.2487	3.41506	0.0402977
												85.332	3.44636	0.040667
												85.4154	3.596	0.0424328
												85.4987	3.58263	0.0422751
												85.582	3.56739	0.0420952
												85.6654	3.41877	0.0403415
												85.7487	3.64589	0.0430215
												85.832	3.57196	0.0421491
												85.9154	3.66093	0.0431989
												85.9987	3.70315	0.0436972
												86.082	3.8924	0.0459303
												86.1654	3.79	0.044722
												86.2487	4.15635	0.0490449
												86.332	4.11983	0.048614
												86.4154	4.04943	0.0477833
												86.4987	4.16093	0.049099
												86.582	4.24389	0.0500779
												86.6654	4.25317	0.0501874
												86.7487	4.42849	0.0522561
												86.832	4.2136	0.0497205
												86.9154	4.29551	0.0506871
												86.9987	4.41075	0.0520469
												87.082	4.37284	0.0515995
												87.1654	4.32148	0.0509934
												87.2487	4.24178	0.050053
												87.332	4.23209	0.0499387
												87.4154	4.29849	0.0507222
												87.4987	4.20521	0.0496215
												87.582	4.15677	0.0490499
												87.6654	4.64005	0.0547526
												87.7487	4.58799	0.0541383
												87.832	4.45235	0.0525378
												87.9154	4.58356	0.054086
												87.9987	4.24979	0.0501475
												88.082	4.08516	0.0482049
												88.1654	4.23504	0.0499735
												88.2487	4.20857	0.0496611
												88.332	4.32659	0.0510538
												88.4154	4.5306	0.0534611
												88.4987	4.31849	0.0509582
												88.582	4.34839	0.051311
												88.6654	4.47107	0.0527586
												88.7487	4.44888	0.0524967
												88.832	-0.0497998	-0.000587638
												88.9154	-0.048367	-0.00057073
												88.9987	-0.0485717	-0.000573146
												89.082	-0.0547095	-0.000645572
												89.1654	-0.0520507	-0.000614198
												89.2487	-0.054914	-0.000647985
												89.332	-0.0524598	-0.000619026
												89.4154	-0.0543005	-0.000640746
												89.4987	-0.0547095	-0.000645572
												89.582	-0.0551185	-0.000650398
												89.6654	-0.0561407	-0.00066246
												89.7487	-0.0585932	-0.0006914
												89.832	-0.054505	-0.000643159
												89.9154	-0.054914	-0.000647985
												89.9987	-0.0577758	-0.000681754
												90.082	-0.0565495	-0.000667284
												90.1654	-0.0571627	-0.00067452

## Sheet: Gas cultivation 3
Ferm. Samples (internal # 14)						Manually adjusted gasflow					Hcp 1.18 mM/atm		Dissolved Oxygen readout (1 point per 3 minutes)
Time [h]	OD600	STD OD600	gcdw [g/L]	(NH4)2SO4 [g/L]		Time [h]	O2 [NmL/min]	CO2 [NmL/min]	H2 [NmL/min]	pO2 [atm]	O* at t [mM]		Time [h]	DO [% saturation]	DO [mM]
0	0.03	0	0.007368	1.41795		0	2	10	85	0.0206186	0.0243299		0.0597122	1.87	0.022066
6.58333	1.86667	0	0.458453	1.39729		6.59545	2	10	85	0.0206186	0.0243299		0.11944	1.81	0.021358
23.75	2.8	0	0.68768	1.21724		6.59545	2	10	85	0.0206186	0.0243299		0.179161	1.83	0.021594
30	2.8	0	0.68768	not determined		6.59644	2	10	85	0.0206186	0.0243299		0.238883	1.83	0.021594
47.25	3.2	0	0.78592	not determined		6.59644	2	10	85	0.0206186	0.0243299		0.298605	1.79	0.021122
53.5833	3.4	0	0.83504	not determined		23.7315	2	10	85	0.0206186	0.0243299		0.358326	1.77	0.020886
60.15	4.8	0	1.17888	not determined		23.7315	2	10	85	0.0206186	0.0243299		0.418047	1.74	0.020532
70	13.3333	0.57735	3.27467	0.0124886		23.7327	2	10	85	0.0206186	0.0243299		0.477769	1.73	0.020414
76	20.3333	0.57735	4.99387	0.00433508		23.7327	2	10	85	0.0206186	0.0243299		0.53749	1.72	0.020296
83.5833	26	1.1547	6.3856	0		30.0095	2	10	85	0.0206186	0.0243299		0.597213	1.7	0.02006
94.6667	34	0	8.3504	0		30.0095	2	10	85	0.0206186	0.0243299		0.656965	1.69	0.019942
102.25	40	6.7987e-15	9.824	0		30.0105	2	10	85	0.0206186	0.0243299		0.71666	1.67	0.019706
125.25	50	1.1547	12.28	0		30.0105	2	10	85	0.0206186	0.0243299		0.776383	1.65	0.01947
153.167	58	2.82843	14.2448	0		47.0523	2	10	85	0.0206186	0.0243299		0.836105	1.63	0.019234
165.333	52	3.4641	12.7712	0		47.0523	2	10	85	0.0206186	0.0243299		0.895851	1.62	0.019116
						47.1031	2	10	85	0.0206186	0.0243299		0.955548	1.6	0.01888
						47.1031	2.5	10	85	0.025641	0.0302564		1.01527	1.58	0.018644
						47.1031	2.5	10	85	0.025641	0.0302564		1.07499	1.56	0.018408
						48.678	2.5	10	85	0.025641	0.0302564		1.13471	1.55	0.01829
						48.678	3	10	85	0.0306122	0.0361224		1.19444	1.53	0.018054
						51.4606	3	10	85	0.0306122	0.0361224		1.25418	1.51	0.017818
						51.4606	4	10	85	0.040404	0.0476768		1.31388	1.49	0.017582
						53.405	4	10	85	0.040404	0.0476768		1.3736	1.48	0.017464
						53.405	4	10	85	0.040404	0.0476768		1.43333	1.47	0.017346
						53.406	4	10	85	0.040404	0.0476768		1.49305	1.45	0.01711
						53.406	4.8	10	85	0.0480962	0.0567535		1.55277	1.43	0.016874
						53.406	4.8	10	85	0.0480962	0.0567535		1.61249	1.4	0.01652
						55.9166	4.8	10	85	0.0480962	0.0567535		1.67224	1.39	0.016402
						55.9166	6	10	85	0.0594059	0.070099		1.73196	1.37	0.016166
						57.5304	6	10	85	0.0594059	0.070099		1.79166	1.34	0.015812
						57.5304	7	10	85	0.0686275	0.0809804		1.8514	1.34	0.015812
						57.6304	7	10	85	0.0686275	0.0809804		1.91111	1.31	0.015458
						57.6304	7.5	10	85	0.0731707	0.0863415		1.97083	1.29	0.015222
						58.5615	7.5	10	85	0.0731707	0.0863415		2.03055	1.26	0.014868
						58.5615	9	10	85	0.0865385	0.102115		2.09027	1.24	0.014632
						59.4565	9	10	85	0.0865385	0.102115		2.15002	1.22	0.014396
						59.4565	10	10	85	0.0952381	0.112381		2.20971	1.2	0.01416
						59.4565	10	10	85	0.0952381	0.112381		2.26944	1.17	0.013806
						60.0772	10	10	85	0.0952381	0.112381		2.32916	1.15	0.01357
						60.0772	10	10	85	0.0952381	0.112381		2.38888	1.14	0.013452
						60.0795	10	10	85	0.0952381	0.112381		2.44861	1.11	0.013098
						60.0795	11	10	85	0.103774	0.122453		2.50832	1.09	0.012862
						60.0795	11	10	85	0.103774	0.122453		2.56804	1.07	0.012626
						60.8137	11	10	85	0.103774	0.122453		2.62779	1.04	0.012272
						60.8137	12	10	85	0.11215	0.132336		2.68751	1.02	0.012036
						60.913	12	10	85	0.11215	0.132336		2.74723	1	0.0118
						60.913	13	10	85	0.12037	0.142037		2.80692	0.99	0.011682
						61.2238	13	10	85	0.12037	0.142037		2.86664	0.95	0.01121
						61.2238	14	10	85	0.12844	0.15156		2.92636	0.95	0.01121
						62.1281	14	10	85	0.12844	0.15156		2.98608	0.94	0.011092
						62.1281	16	10	85	0.144144	0.17009		3.0458	0.91	0.010738
						62.5297	16	10	85	0.144144	0.17009		3.10552	0.89	0.010502
						62.5297	20	10	85	0.173913	0.205217		3.16524	0.88	0.010384
						63.1071	20	20	200	0.0833333	0.0983333		3.22496	0.87	0.010266
						63.1071	20	20	200	0.0833333	0.0983333		3.28468	0.84	0.009912
						63.5703	20	20	200	0.0833333	0.0983333		3.3444	0.83	0.009794
						63.5703	15	20	200	0.0638298	0.0753191		3.40412	0.83	0.009794
						63.5703	15	20	200	0.0638298	0.0753191		3.46384	0.82	0.009676
						63.6318	15	20	200	0.0638298	0.0753191		3.52356	0.81	0.009558
						63.6318	20	20	200	0.0833333	0.0983333		3.58328	0.81	0.009558
						63.6784	20	20	200	0.0833333	0.0983333		3.643	0.79	0.009322
						63.6784	25	20	200	0.102041	0.120408		3.70272	0.77	0.009086
						63.7323	25	20	200	0.102041	0.120408		3.76247	0.76	0.008968
						63.7323	27	20	200	0.109312	0.128988		3.82217	0.74	0.008732
						63.8579	27	20	200	0.109312	0.128988		3.88189	0.71	0.008378
						63.8579	28	20	200	0.112903	0.133226		3.94163	0.68	0.008024
						63.8742	28	20	200	0.112903	0.133226		4.00133	0.67	0.007906
						63.8742	30	20	200	0.12	0.1416		4.06105	0.63	0.007434
						64.0365	30	20	200	0.12	0.1416		4.12077	0.63	0.007434
						64.0365	33	20	200	0.130435	0.153913		4.18052	0.61	0.007198
						64.1359	33	20	200	0.130435	0.153913		4.24021	0.59	0.006962
						64.1359	35	20	200	0.137255	0.161961		4.29993	0.57	0.006726
						64.2187	35	20	200	0.137255	0.161961		4.35965	0.57	0.006726
						64.2187	37	20	200	0.143969	0.169883		4.41937	0.56	0.006608
						64.4746	37	20	200	0.143969	0.169883		4.47909	0.53	0.006254
						64.4746	35	20	200	0.137255	0.161961		4.53884	0.52	0.006136
						64.5076	35	20	200	0.137255	0.161961		4.59854	0.51	0.006018
						64.5076	36	20	200	0.140625	0.165937		4.65826	0.48	0.005664
						64.5367	36	20	200	0.140625	0.165937		4.71798	0.49	0.005782
						64.5367	35	20	200	0.137255	0.161961		4.7777	0.47	0.005546
						64.551	35	20	200	0.137255	0.161961		4.83742	0.45	0.00531
						64.551	33	20	200	0.130435	0.153913		4.89714	0.43	0.005074
						64.5589	33	20	200	0.130435	0.153913		4.95687	0.42	0.004956
						64.5589	26	20	200	0.105691	0.124715		5.01659	0.4	0.00472
						64.5604	26	20	200	0.105691	0.124715		5.07633	0.4	0.00472
						64.5604	28	20	200	0.112903	0.133226		5.13603	0.39	0.004602
						64.5994	28	20	200	0.112903	0.133226		5.19575	0.36	0.004248
						64.5994	30	20	200	0.12	0.1416		5.25547	0.36	0.004248
						64.642	30	20	200	0.12	0.1416		5.3152	0.33	0.003894
						64.642	31	20	200	0.123506	0.145737		5.37494	0.31	0.003658
						67.77	31	20	200	0.123506	0.145737		5.43464	0.28	0.003304
						67.77	29	20	200	0.116466	0.13743		5.49436	0.27	0.003186
						67.7727	29	20	200	0.116466	0.13743		5.55408	0.28	0.003304
						67.7727	29	20	200	0.116466	0.13743		5.61381	0.25	0.00295
						69.7573	29	20	200	0.116466	0.13743		5.67353	0.23	0.002714
						69.7573	28	20	200	0.112903	0.133226		5.73325	0.22	0.002596
						69.7573	28	20	200	0.112903	0.133226		5.79297	0.19	0.002242
						75.8856	28	20	200	0.112903	0.133226		5.85269	0.18	0.002124
						75.8856	28	20	200	0.112903	0.133226		5.91241	0.16	0.001888
						75.8876	28	20	200	0.112903	0.133226		5.97213	0.13	0.001534
						75.8876	28	20	200	0.112903	0.133226		6.03186	0.12	0.001416
						83.5536	28	20	200	0.112903	0.133226		6.09158	0.11	0.001298
						83.5536	28	20	200	0.112903	0.133226		6.1513	0.11	0.001298
						83.5559	28	20	200	0.112903	0.133226		6.21102	0.11	0.001298
						83.5559	28	20	200	0.112903	0.133226		6.27077	0.11	0.001298
						92.5137	28	20	200	0.112903	0.133226		6.33046	0.1	0.00118
						92.5137	27	20	200	0.109312	0.128988		6.39021	0.1	0.00118
						94.6597	27	20	200	0.109312	0.128988		6.44991	0.1	0.00118
						94.6597	27	20	200	0.109312	0.128988		6.50963	0.1	0.00118
						94.6612	27	20	200	0.109312	0.128988		6.56935	0.1	0.00118
						94.6612	27	20	200	0.109312	0.128988		6.62908	0.1	0.00118
						102.242	27	20	200	0.109312	0.128988		6.6888	0.1	0.00118
						102.242	27	20	200	0.109312	0.128988		6.74852	0.1	0.00118
						102.244	27	20	200	0.109312	0.128988		6.80824	0.1	0.00118
						102.244	28	20	200	0.112903	0.133226		6.86796	0.1	0.00118
						102.244	28	20	200	0.112903	0.133226		6.92769	0.11	0.001298
						125.02	28	20	200	0.112903	0.133226		6.98741	0.1	0.00118
						125.02	28	20	200	0.112903	0.133226		7.04713	0.09	0.001062
						125.022	28	20	200	0.112903	0.133226		7.10685	0.1	0.00118
						125.022	28	20	200	0.112903	0.133226		7.16657	0.1	0.00118
						153.665	28	20	200	0.112903	0.133226		7.2263	0.09	0.001062
						153.665	28	20	200	0.112903	0.133226		7.28604	0.1	0.00118
						153.667	28	20	200	0.112903	0.133226		7.34576	0.09	0.001062
						153.667	28	20	200	0.112903	0.133226		7.40546	0.09	0.001062
						165.215	28	20	200	0.112903	0.133226		7.46519	0.1	0.00118
						165.215	28	20	200	0.112903	0.133226		7.52491	0.1	0.00118
						165.217	28	20	200	0.112903	0.133226		7.58465	0.1	0.00118
						165.217	28	20	200	0.112903	0.133226		7.64435	0.1	0.00118
						165.537	28	20	200	0.112903	0.133226		7.70407	0.1	0.00118
						165.537	28	20	200	0.112903	0.133226		7.76379	0.09	0.001062
													7.82352	0.09	0.001062
													7.88324	0.09	0.001062
													7.94296	0.09	0.001062
													8.00268	0.09	0.001062
													8.06241	0.09	0.001062
													8.12213	0.09	0.001062
													8.18185	0.09	0.001062
													8.24157	0.09	0.001062
													8.30129	0.09	0.001062
													8.36104	0.09	0.001062
													8.42076	0.08	0.000944
													8.48046	0.09	0.001062
													8.54018	0.09	0.001062
													8.5999	0.09	0.001062
													8.65962	0.09	0.001062
													8.71935	0.09	0.001062
													8.77907	0.09	0.001062
													8.83879	0.09	0.001062
													8.89851	0.09	0.001062
													8.95826	0.09	0.001062
													9.01796	0.09	0.001062
													9.07768	0.09	0.001062
													9.1374	0.09	0.001062
													9.19712	0.08	0.000944
													9.25685	0.08	0.000944
													9.31657	0.09	0.001062
													9.37629	0.09	0.001062
													9.43602	0.09	0.001062
													9.49574	0.09	0.001062
													9.55546	0.09	0.001062
													9.61518	0.08	0.000944
													9.6749	0.08	0.000944
													9.73463	0.08	0.000944
													9.79435	0.1	0.00118
													9.85407	0.09	0.001062
													9.91379	0.08	0.000944
													9.97351	0.09	0.001062
													10.0332	0.08	0.000944
													10.093	0.09	0.001062
													10.1527	0.08	0.000944
													10.2124	0.09	0.001062
													10.2721	0.08	0.000944
													10.3318	0.09	0.001062
													10.3916	0.09	0.001062
													10.4513	0.08	0.000944
													10.511	0.09	0.001062
													10.5707	0.08	0.000944
													10.6305	0.08	0.000944
													10.6902	0.08	0.000944
													10.7499	0.08	0.000944
													10.8096	0.08	0.000944
													10.8693	0.09	0.001062
													10.9291	0.08	0.000944
													10.9888	0.08	0.000944
													11.0485	0.08	0.000944
													11.1083	0.09	0.001062
													11.168	0.08	0.000944
													11.2277	0.08	0.000944
													11.2874	0.07	0.000826
													11.3471	0.09	0.001062
													11.4068	0.08	0.000944
													11.4666	0.08	0.000944
													11.5263	0.08	0.000944
													11.586	0.08	0.000944
													11.6457	0.08	0.000944
													11.7054	0.08	0.000944
													11.7652	0.08	0.000944
													11.8249	0.08	0.000944
													11.8846	0.08	0.000944
													11.9443	0.08	0.000944
													12.004	0.08	0.000944
													12.0638	0.09	0.001062
													12.1235	0.08	0.000944
													12.1832	0.08	0.000944
													12.2429	0.08	0.000944
													12.3027	0.08	0.000944
													12.3624	0.08	0.000944
													12.4221	0.08	0.000944
													12.4818	0.08	0.000944
													12.5416	0.08	0.000944
													12.6012	0.08	0.000944
													12.661	0.08	0.000944
													12.7207	0.08	0.000944
													12.7804	0.08	0.000944
													12.8401	0.08	0.000944
													12.8999	0.08	0.000944
													12.9596	0.08	0.000944
													13.0193	0.08	0.000944
													13.079	0.08	0.000944
													13.1387	0.08	0.000944
													13.1985	0.08	0.000944
													13.2582	0.08	0.000944
													13.3179	0.08	0.000944
													13.3776	0.08	0.000944
													13.4374	0.08	0.000944
													13.4971	0.08	0.000944
													13.5568	0.08	0.000944
													13.6165	0.08	0.000944
													13.6762	0.08	0.000944
													13.7359	0.08	0.000944
													13.7957	0.08	0.000944
													13.8554	0.08	0.000944
													13.9151	0.08	0.000944
													13.9748	0.08	0.000944
													14.0346	0.08	0.000944
													14.0943	0.08	0.000944
													14.154	0.08	0.000944
													14.2137	0.08	0.000944
													14.2734	0.07	0.000826
													14.3332	0.08	0.000944
													14.3929	0.08	0.000944
													14.4526	0.08	0.000944
													14.5123	0.08	0.000944
													14.572	0.08	0.000944
													14.6318	0.08	0.000944
													14.6915	0.08	0.000944
													14.7512	0.08	0.000944
													14.8109	0.08	0.000944
													14.8707	0.08	0.000944
													14.9304	0.08	0.000944
													14.9901	0.08	0.000944
													15.0498	0.08	0.000944
													15.1095	0.07	0.000826
													15.1693	0.08	0.000944
													15.229	0.08	0.000944
													15.2887	0.08	0.000944
													15.3484	0.08	0.000944
													15.4082	0.08	0.000944
													15.4679	0.08	0.000944
													15.5276	0.08	0.000944
													15.5873	0.08	0.000944
													15.647	0.08	0.000944
													15.7068	0.08	0.000944
													15.7665	0.08	0.000944
													15.8262	0.08	0.000944
													15.8859	0.07	0.000826
													15.9456	0.08	0.000944
													16.0054	0.08	0.000944
													16.0651	0.08	0.000944
													16.1248	0.08	0.000944
													16.1845	0.08	0.000944
													16.2443	0.08	0.000944
													16.304	0.07	0.000826
													16.3637	0.08	0.000944
													16.4234	0.08	0.000944
													16.4831	0.08	0.000944
													16.5429	0.08	0.000944
													16.6026	0.08	0.000944
													16.6623	0.08	0.000944
													16.7221	0.08	0.000944
													16.7818	0.08	0.000944
													16.8415	0.08	0.000944
													16.9012	0.08	0.000944
													16.9609	0.08	0.000944
													17.0206	0.08	0.000944
													17.0804	0.08	0.000944
													17.1401	0.08	0.000944
													17.1998	0.08	0.000944
													17.2595	0.08	0.000944
													17.3193	0.08	0.000944
													17.379	0.07	0.000826
													17.4387	0.08	0.000944
													17.4984	0.08	0.000944
													17.5581	0.08	0.000944
													17.6179	0.07	0.000826
													17.6776	0.08	0.000944
													17.7373	0.08	0.000944
													17.797	0.08	0.000944
													17.8568	0.08	0.000944
													17.9165	0.08	0.000944
													17.9762	0.08	0.000944
													18.0359	0.08	0.000944
													18.0956	0.08	0.000944
													18.1554	0.07	0.000826
													18.2151	0.08	0.000944
													18.2748	0.08	0.000944
													18.3345	0.08	0.000944
													18.3943	0.07	0.000826
													18.454	0.08	0.000944
													18.5137	0.08	0.000944
													18.5734	0.08	0.000944
													18.6331	0.08	0.000944
													18.6929	0.08	0.000944
													18.7526	0.08	0.000944
													18.8123	0.08	0.000944
													18.872	0.08	0.000944
													18.9318	0.08	0.000944
													18.9915	0.07	0.000826
													19.0512	0.08	0.000944
													19.1109	0.08	0.000944
													19.1706	0.08	0.000944
													19.2304	0.08	0.000944
													19.2901	0.08	0.000944
													19.3498	0.08	0.000944
													19.4095	0.08	0.000944
													19.4693	0.08	0.000944
													19.529	0.07	0.000826
													19.5887	0.08	0.000944
													19.6484	0.08	0.000944
													19.7081	0.08	0.000944
													19.7679	0.08	0.000944
													19.8276	0.08	0.000944
													19.8873	0.08	0.000944
													19.947	0.08	0.000944
													20.0068	0.07	0.000826
													20.0665	0.08	0.000944
													20.1262	0.08	0.000944
													20.1859	0.08	0.000944
													20.2456	0.08	0.000944
													20.3054	0.07	0.000826
													20.3651	0.08	0.000944
													20.4248	0.08	0.000944
													20.4845	0.08	0.000944
													20.5443	0.08	0.000944
													20.604	0.08	0.000944
													20.6637	0.08	0.000944
													20.7234	0.08	0.000944
													20.7831	0.08	0.000944
													20.8429	0.08	0.000944
													20.9026	0.08	0.000944
													20.9623	0.08	0.000944
													21.022	0.08	0.000944
													21.0817	0.08	0.000944
													21.1415	0.08	0.000944
													21.2012	0.08	0.000944
													21.2609	0.08	0.000944
													21.3206	0.08	0.000944
													21.3803	0.08	0.000944
													21.4401	0.08	0.000944
													21.4998	0.09	0.001062
													21.5595	0.08	0.000944
													21.6192	0.08	0.000944
													21.6789	0.08	0.000944
													21.7387	0.08	0.000944
													21.7984	0.08	0.000944
													21.8581	0.08	0.000944
													21.9178	0.08	0.000944
													21.9775	0.08	0.000944
													22.0373	0.07	0.000826
													22.097	0.08	0.000944
													22.1567	0.08	0.000944
													22.2164	0.08	0.000944
													22.2761	0.08	0.000944
													22.3359	0.07	0.000826
													22.3956	0.08	0.000944
													22.4553	0.07	0.000826
													22.5151	0.08	0.000944
													22.5747	0.08	0.000944
													22.6345	0.08	0.000944
													22.6942	0.08	0.000944
													22.7539	0.08	0.000944
													22.8136	0.07	0.000826
													22.8734	0.07	0.000826
													22.9331	0.08	0.000944
													22.9928	0.08	0.000944
													23.0525	0.08	0.000944
													23.1122	0.08	0.000944
													23.172	0.08	0.000944
													23.2317	0.08	0.000944
													23.2914	0.08	0.000944
													23.3511	0.08	0.000944
													23.4109	0.07	0.000826
													23.4706	0.08	0.000944
													23.5303	0.07	0.000826
													23.59	0.08	0.000944
													23.6497	0.07	0.000826
													23.7095	0.08	0.000944
													23.7692	0.08	0.000944
													23.8289	0.08	0.000944
													23.8886	0.08	0.000944
													23.9483	0.07	0.000826
													24.0081	0.08	0.000944
													24.0678	0.08	0.000944
													24.1275	0.07	0.000826
													24.1872	0.08	0.000944
													24.247	0.07	0.000826
													24.3067	0.07	0.000826
													24.3664	0.08	0.000944
													24.4261	0.08	0.000944
													24.4858	0.08	0.000944
													24.5456	0.08	0.000944
													24.6053	0.08	0.000944
													24.665	0.08	0.000944
													24.7247	0.08	0.000944
													24.7844	0.08	0.000944
													24.8442	0.08	0.000944
													24.9039	0.08	0.000944
													24.9636	0.08	0.000944
													25.0233	0.07	0.000826
													25.0831	0.08	0.000944
													25.1428	0.07	0.000826
													25.2025	0.08	0.000944
													25.2622	0.07	0.000826
													25.3219	0.08	0.000944
													25.3817	0.08	0.000944
													25.4414	0.08	0.000944
													25.5011	0.08	0.000944
													25.5608	0.07	0.000826
													25.6206	0.07	0.000826
													25.6803	0.08	0.000944
													25.74	0.08	0.000944
													25.7997	0.08	0.000944
													25.8594	0.08	0.000944
													25.9192	0.08	0.000944
													25.9789	0.08	0.000944
													26.0386	0.08	0.000944
													26.0983	0.07	0.000826
													26.1581	0.08	0.000944
													26.2178	0.07	0.000826
													26.2775	0.09	0.001062
													26.3372	0.7	0.00826
													26.3969	0.26	0.003068
													26.4567	0.27	0.003186
													26.5164	0.23	0.002714
													26.5761	0.17	0.002006
													26.6358	0.13	0.001534
													26.6956	0.13	0.001534
													26.7553	4	0.0472
													26.815	0.08	0.000944
													26.8747	0.9	0.01062
													26.9344	1.37	0.016166
													26.9942	1.27	0.014986
													27.0539	1.16	0.013688
													27.1136	1.08	0.012744
													27.1733	0.82	0.009676
													27.2331	0.66	0.007788
													27.2928	0.52	0.006136
													27.3525	0.39	0.004602
													27.4122	1.13	0.013334
													27.4719	0.07	0.000826
													27.5317	0.07	0.000826
													27.5914	0.07	0.000826
													27.6511	0.07	0.000826
													27.7108	0.07	0.000826
													27.7706	0.07	0.000826
													27.8303	0.07	0.000826
													27.89	0.07	0.000826
													27.9497	0.07	0.000826
													28.0094	0.07	0.000826
													28.0692	0.07	0.000826
													28.1289	0.07	0.000826
													28.1886	0.07	0.000826
													28.2483	0.07	0.000826
													28.3081	0.07	0.000826
													28.3678	0.07	0.000826
													28.4275	0.08	0.000944
													28.4872	0.07	0.000826
													28.5469	0.07	0.000826
													28.6067	0.07	0.000826
													28.6664	0.07	0.000826
													28.7261	0.07	0.000826
													28.7858	0.07	0.000826
													28.8456	0.07	0.000826
													28.9053	0.07	0.000826
													28.965	0.07	0.000826
													29.0247	0.07	0.000826
													29.0845	0.08	0.000944
													29.1442	0.07	0.000826
													29.2039	0.07	0.000826
													29.2636	0.07	0.000826
													29.3233	0.07	0.000826
													29.3831	0.07	0.000826
													29.4428	0.07	0.000826
													29.5025	0.07	0.000826
													29.5622	0.07	0.000826
													29.6219	0.07	0.000826
													29.6817	0.07	0.000826
													29.7414	0.07	0.000826
													29.8011	0.07	0.000826
													29.8608	0.07	0.000826
													29.9205	0.07	0.000826
													29.9803	0.07	0.000826
													30.04	0.06	0.000708
													30.0997	0.07	0.000826
													30.1594	0.06	0.000708
													30.2191	0.07	0.000826
													30.2789	0.22	0.002596
													30.3386	0.84	0.009912
													30.3983	0.97	0.011446
													30.458	0.98	0.011564
													30.5177	0.99	0.011682
													30.5775	0.99	0.011682
													30.6372	0.99	0.011682
													30.6969	0.98	0.011564
													30.7566	0.97	0.011446
													30.8163	0.97	0.011446
													30.8761	0.94	0.011092
													30.9358	0.94	0.011092
													30.9955	0.92	0.010856
													31.0552	0.93	0.010974
													31.1149	0.92	0.010856
													31.1747	0.9	0.01062
													31.2344	0.9	0.01062
													31.2941	0.89	0.010502
													31.3538	0.87	0.010266
													31.4135	0.88	0.010384
													31.4733	0.86	0.010148
													31.533	0.86	0.010148
													31.5927	0.85	0.01003
													31.6524	0.85	0.01003
													31.7122	0.84	0.009912
													31.7719	0.82	0.009676
													31.8316	0.83	0.009794
													31.8913	0.82	0.009676
													31.951	0.81	0.009558
													32.0108	0.81	0.009558
													32.0705	0.8	0.00944
													32.1302	0.8	0.00944
													32.1899	0.81	0.009558
													32.2496	0.8	0.00944
													32.3094	0.78	0.009204
													32.3691	0.78	0.009204
													32.4288	0.77	0.009086
													32.4885	0.77	0.009086
													32.5483	0.76	0.008968
													32.608	0.76	0.008968
													32.6677	0.77	0.009086
													32.7274	0.75	0.00885
													32.7871	0.74	0.008732
													32.8469	0.74	0.008732
													32.9066	0.73	0.008614
													32.9663	0.72	0.008496
													33.026	0.72	0.008496
													33.0857	0.73	0.008614
													33.1455	0.73	0.008614
													33.2052	0.73	0.008614
													33.2649	0.74	0.008732
													33.3246	0.73	0.008614
													33.3844	0.72	0.008496
													33.4441	0.73	0.008614
													33.5038	0.73	0.008614
													33.5635	0.72	0.008496
													33.6232	0.73	0.008614
													33.683	0.74	0.008732
													33.7427	0.73	0.008614
													33.8024	0.74	0.008732
													33.8621	0.76	0.008968
													33.9219	0.75	0.00885
													33.9816	0.76	0.008968
													34.0413	0.76	0.008968
													34.101	0.76	0.008968
													34.1607	0.77	0.009086
													34.2205	0.77	0.009086
													34.2802	0.79	0.009322
													34.3399	0.78	0.009204
													34.3996	0.81	0.009558
													34.4594	0.79	0.009322
													34.5191	0.81	0.009558
													34.5788	0.81	0.009558
													34.6385	0.82	0.009676
													34.6982	0.82	0.009676
													34.758	0.83	0.009794
													34.8177	0.83	0.009794
													34.8774	0.86	0.010148
													34.9371	0.86	0.010148
													34.9969	0.88	0.010384
													35.0566	0.88	0.010384
													35.1163	0.87	0.010266
													35.176	0.88	0.010384
													35.2357	0.89	0.010502
													35.2955	0.89	0.010502
													35.3552	0.91	0.010738
													35.4149	0.91	0.010738
													35.4746	0.93	0.010974
													35.5344	0.93	0.010974
													35.5941	0.93	0.010974
													35.6538	0.95	0.01121
													35.7135	0.96	0.011328
													35.7733	0.97	0.011446
													35.833	0.97	0.011446
													35.8927	0.97	0.011446
													35.9524	0.98	0.011564
													36.0121	1	0.0118
													36.0719	0.98	0.011564
													36.1316	1	0.0118
													36.1913	1.02	0.012036
													36.251	1.01	0.011918
													36.3107	1.02	0.012036
													36.3705	1.02	0.012036
													36.4302	1.03	0.012154
													36.4899	1.04	0.012272
													36.5496	1.04	0.012272
													36.6093	1.04	0.012272
													36.6691	1.04	0.012272
													36.7288	1.06	0.012508
													36.7885	1.07	0.012626
													36.8482	1.06	0.012508
													36.908	1.06	0.012508
													36.9677	1.06	0.012508
													37.0274	1.08	0.012744
													37.0871	1.08	0.012744
													37.1468	1.08	0.012744
													37.2066	1.09	0.012862
													37.2663	1.09	0.012862
													37.326	1.09	0.012862
													37.3857	1.09	0.012862
													37.4455	1.1	0.01298
													37.5052	1.1	0.01298
													37.5649	1.11	0.013098
													37.6246	1.11	0.013098
													37.6843	1.11	0.013098
													37.7441	1.1	0.01298
													37.8038	1.12	0.013216
													37.8635	1.12	0.013216
													37.9233	1.12	0.013216
													37.983	1.13	0.013334
													38.0427	1.11	0.013098
													38.1024	1.13	0.013334
													38.1621	1.12	0.013216
													38.2218	1.13	0.013334
													38.2816	1.12	0.013216
													38.3413	1.12	0.013216
													38.401	1.12	0.013216
													38.4607	1.13	0.013334
													38.5205	1.13	0.013334
													38.5802	1.13	0.013334
													38.6399	1.13	0.013334
													38.6996	1.13	0.013334
													38.7593	1.13	0.013334
													38.8191	1.13	0.013334
													38.8788	1.13	0.013334
													38.9385	1.14	0.013452
													38.9982	1.14	0.013452
													39.058	1.13	0.013334
													39.1177	1.14	0.013452
													39.1774	1.13	0.013334
													39.2371	1.14	0.013452
													39.2968	1.14	0.013452
													39.3566	1.13	0.013334
													39.4163	1.13	0.013334
													39.476	1.12	0.013216
													39.5357	1.13	0.013334
													39.5954	1.13	0.013334
													39.6551	1.13	0.013334
													39.7149	1.13	0.013334
													39.7746	1.12	0.013216
													39.8343	1.13	0.013334
													39.894	1.12	0.013216
													39.9538	1.11	0.013098
													40.0135	1.12	0.013216
													40.0732	1.12	0.013216
													40.1329	1.13	0.013334
													40.1926	1.12	0.013216
													40.2524	1.12	0.013216
													40.3121	1.1	0.01298
													40.3718	1.1	0.01298
													40.4315	1.11	0.013098
													40.4912	1.11	0.013098
													40.551	1.11	0.013098
													40.6107	1.1	0.01298
													40.6704	1.11	0.013098
													40.7301	1.09	0.012862
													40.7898	1.08	0.012744
													40.8496	1.1	0.01298
													40.9093	1.08	0.012744
													40.969	1.09	0.012862
													41.0287	1.07	0.012626
													41.0884	1.07	0.012626
													41.1482	1.07	0.012626
													41.2079	1.07	0.012626
													41.2676	1.06	0.012508
													41.3273	0.06	0.000708
													41.3871	0.07	0.000826
													41.4468	0.47	0.005546
													41.5065	0.89	0.010502
													41.5662	0.96	0.011328
													41.626	0.98	0.011564
													41.6857	1.01	0.011918
													41.7454	1.01	0.011918
													41.8051	1.02	0.012036
													41.8648	1.02	0.012036
													41.9246	1.01	0.011918
													41.9843	1.01	0.011918
													42.044	1.01	0.011918
													42.1037	1.01	0.011918
													42.1634	0.99	0.011682
													42.2232	1	0.0118
													42.2829	0.99	0.011682
													42.3426	0.98	0.011564
													42.4023	0.98	0.011564
													42.4621	0.98	0.011564
													42.5218	0.98	0.011564
													42.5815	0.97	0.011446
													42.6412	0.97	0.011446
													42.7009	0.95	0.01121
													42.7607	0.94	0.011092
													42.8204	0.95	0.01121
													42.8801	0.94	0.011092
													42.9398	0.94	0.011092
													42.9995	0.94	0.011092
													43.0593	0.92	0.010856
													43.119	0.92	0.010856
													43.1787	0.91	0.010738
													43.2384	0.91	0.010738
													43.2982	0.9	0.01062
													43.3579	0.9	0.01062
													43.4176	0.9	0.01062
													43.4773	0.89	0.010502
													43.537	0.89	0.010502
													43.5968	0.87	0.010266
													43.6565	0.87	0.010266
													43.7162	0.86	0.010148
													43.7759	0.84	0.009912
													43.8356	0.85	0.01003
													43.8954	0.85	0.01003
													43.9551	0.85	0.01003
													44.0148	0.82	0.009676
													44.0745	0.82	0.009676
													44.1343	0.8	0.00944
													44.194	0.8	0.00944
													44.2537	0.8	0.00944
													44.3135	0.8	0.00944
													44.3731	0.79	0.009322
													44.4329	0.77	0.009086
													44.4926	0.76	0.008968
													44.5523	0.76	0.008968
													44.612	0.76	0.008968
													44.6718	0.75	0.00885
													44.7315	0.74	0.008732
													44.7912	0.75	0.00885
													44.8509	1.45	0.01711
													44.9107	1.71	0.020178
													44.9704	1.75	0.02065
													45.0301	1.75	0.02065
													45.0898	1.75	0.02065
													45.1495	1.75	0.02065
													45.2093	1.73	0.020414
													45.269	1.73	0.020414
													45.3287	1.72	0.020296
													45.3884	1.71	0.020178
													45.4481	1.7	0.02006
													45.5079	1.7	0.02006
													45.5676	1.7	0.02006
													45.6273	1.67	0.019706
													45.687	1.66	0.019588
													45.7468	1.65	0.01947
													45.8065	1.65	0.01947
													45.8662	1.63	0.019234
													45.9259	1.64	0.019352
													45.9856	1.63	0.019234
													46.0454	1.61	0.018998
													46.1051	1.6	0.01888
													46.1648	1.59	0.018762
													46.2246	1.58	0.018644
													46.2843	1.57	0.018526
													46.344	1.55	0.01829
													46.4037	1.54	0.018172
													46.4634	1.53	0.018054
													46.5231	1.53	0.018054
													46.5829	1.52	0.017936
													46.6426	1.5	0.0177
													46.7023	1.51	0.017818
													46.762	1.49	0.017582
													46.8218	1.48	0.017464
													46.8815	1.47	0.017346
													46.9412	1.45	0.01711
													47.0009	1.45	0.01711
													47.0606	1.43	0.016874
													47.1204	1.43	0.016874
													47.1801	1.42	0.016756
													47.2398	1.4	0.01652
													47.2995	1.4	0.01652
													47.3593	1.38	0.016284
													47.419	1.4	0.01652
													47.4787	1.37	0.016166
													47.5384	1.35	0.01593
													47.5982	1.33	0.015694
													47.6579	1.33	0.015694
													47.7176	1.33	0.015694
													47.7773	1.3	0.01534
													47.837	1.3	0.01534
													47.8968	1.28	0.015104
													47.9565	1.28	0.015104
													48.0162	1.25	0.01475
													48.0759	1.25	0.01475
													48.1356	1.24	0.014632
													48.1954	1.23	0.014514
													48.2551	1.21	0.014278
													48.3148	1.21	0.014278
													48.3745	1.19	0.014042
													48.4342	1.16	0.013688
													48.494	1.17	0.013806
													48.5537	1.18	0.013924
													48.6134	1.15	0.01357
													48.6731	1.14	0.013452
													48.7328	1.13	0.013334
													48.7926	1.1	0.01298
													48.8523	1.07	0.012626
													48.912	1.07	0.012626
													48.9717	1.07	0.012626
													49.0314	1.06	0.012508
													49.0912	1.02	0.012036
													49.1509	1	0.0118
													49.2106	1	0.0118
													49.2703	1	0.0118
													49.33	0.98	0.011564
													49.3898	0.98	0.011564
													49.4495	0.96	0.011328
													49.5092	0.91	0.010738
													49.5689	0.91	0.010738
													49.6286	0.51	0.006018
													49.6884	0.08	0.000944
													49.7481	0.84	0.009912
													49.8078	0.82	0.009676
													49.8675	0.82	0.009676
													49.9272	0.81	0.009558
													49.987	0.82	0.009676
													50.0467	0.81	0.009558
													50.1064	0.78	0.009204
													50.1661	0.76	0.008968
													50.2259	0.73	0.008614
													50.2856	0.71	0.008378
													50.3453	0.7	0.00826
													50.405	0.67	0.007906
													50.4647	0.66	0.007788
													50.5245	0.63	0.007434
													50.5842	0.63	0.007434
													50.6439	0.59	0.006962
													50.7036	0.56	0.006608
													50.7633	0.56	0.006608
													50.8231	0.52	0.006136
													50.8828	0.5	0.0059
													50.9425	0.48	0.005664
													51.0022	0.48	0.005664
													51.062	1.28	0.015104
													51.1217	1.65	0.01947
													51.1814	1.95	0.02301
													51.2411	1.97	0.023246
													51.3008	1.96	0.023128
													51.3606	1.95	0.02301
													51.4203	1.94	0.022892
													51.48	1.92	0.022656
													51.5397	1.91	0.022538
													51.5995	1.91	0.022538
													51.6592	1.88	0.022184
													51.7189	1.86	0.021948
													51.7786	1.84	0.021712
													51.8383	1.86	0.021948
													51.8981	1.78	0.021004
													51.9578	1.77	0.020886
													52.0175	1.77	0.020886
													52.0772	1.74	0.020532
													52.1369	1.72	0.020296
													52.1967	1.7	0.02006
													52.2564	1.71	0.020178
													52.3161	1.69	0.019942
													52.3759	1.64	0.019352
													52.4356	1.63	0.019234
													52.4953	1.63	0.019234
													52.555	1.6	0.01888
													52.6147	1.6	0.01888
													52.6744	1.56	0.018408
													52.7342	1.55	0.01829
													52.7939	1.53	0.018054
													52.8536	1.51	0.017818
													52.9133	1.47	0.017346
													52.9731	1.44	0.016992
													53.0328	1.42	0.016756
													53.0925	1.41	0.016638
													53.1522	1.38	0.016284
													53.2119	1.38	0.016284
													53.2717	1.35	0.01593
													53.3314	1.29	0.015222
													53.3911	1.27	0.014986
													53.4508	1.25	0.01475
													53.5106	1.23	0.014514
													53.5703	1.2	0.01416
													53.63	1.18	0.013924
													53.6897	1.16	0.013688
													53.7494	1.11	0.013098
													53.8092	1.09	0.012862
													53.8689	1.07	0.012626
													53.9286	1.03	0.012154
													53.9883	0.99	0.011682
													54.0481	0.97	0.011446
													54.1078	0.97	0.011446
													54.1675	0.92	0.010856
													54.2272	0.87	0.010266
													54.2869	0.85	0.01003
													54.3467	0.81	0.009558
													54.4064	0.75	0.00885
													54.4661	0.75	0.00885
													54.5258	0.73	0.008614
													54.5855	0.69	0.008142
													54.6453	0.65	0.00767
													54.705	0.61	0.007198
													54.7647	0.58	0.006844
													54.8244	1.86	0.021948
													54.8842	2.05	0.02419
													54.9439	2.04	0.024072
													55.0036	2.01	0.023718
													55.0633	2	0.0236
													55.123	1.97	0.023246
													55.1828	1.89	0.022302
													55.2425	1.86	0.021948
													55.3022	1.81	0.021358
													55.3619	1.77	0.020886
													55.4217	1.74	0.020532
													55.4814	1.69	0.019942
													55.5411	1.66	0.019588
													55.6008	1.63	0.019234
													55.6605	1.59	0.018762
													55.7203	1.55	0.01829
													55.78	1.49	0.017582
													55.8397	1.43	0.016874
													55.8994	1.42	0.016756
													55.9592	1.42	0.016756
													56.0189	1.34	0.015812
													56.0786	1.3	0.01534
													56.1383	1.23	0.014514
													56.1981	1.2	0.01416
													56.2578	1.19	0.014042
													56.3175	1.15	0.01357
													56.3772	1.06	0.012508
													56.4369	1.01	0.011918
													56.4967	1.01	0.011918
													56.5564	0.96	0.011328
													56.6161	0.91	0.010738
													56.6758	0.82	0.009676
													56.7356	0.83	0.009794
													56.7953	0.79	0.009322
													56.855	0.78	0.009204
													56.9147	0.7	0.00826
													56.9745	0.67	0.007906
													57.0342	0.62	0.007316
													57.0939	0.57	0.006726
													57.1536	0.53	0.006254
													57.2133	0.45	0.00531
													57.2731	0.45	0.00531
													57.3328	0.44	0.005192
													57.3925	0.33	0.003894
													57.4522	0.31	0.003658
													57.5119	0.28	0.003304
													57.5717	0.23	0.002714
													57.6314	0.22	0.002596
													57.6911	0.21	0.002478
													57.7508	0.32	0.003776
													57.8105	2.71	0.031978
													57.8703	2.92	0.034456
													57.93	2.89	0.034102
													57.9897	2.85	0.03363
													58.0494	2.84	0.033512
													58.1091	2.73	0.032214
													58.1688	2.62	0.030916
													58.2286	2.63	0.031034
													58.2883	2.57	0.030326
													58.348	2.44	0.028792
													58.4077	2.37	0.027966
													58.4674	2.33	0.027494
													58.5272	2.29	0.027022
													58.5869	2.22	0.026196
													58.6466	2.16	0.025488
													58.7063	2.07	0.024426
													58.766	2.03	0.023954
													58.8258	1.94	0.022892
													58.8855	1.89	0.022302
													58.9452	1.82	0.021476
													59.0049	1.75	0.02065
													59.0647	1.69	0.019942
													59.1244	1.65	0.01947
													59.1841	1.65	0.01947
													59.2438	1.52	0.017936
													59.3036	1.42	0.016756
													59.3633	1.36	0.016048
													59.423	1.41	0.016638
													59.4827	1.26	0.014868
													59.5424	1.17	0.013806
													59.6021	1.15	0.01357
													59.6619	1.08	0.012744
													59.7216	0.99	0.011682
													59.7813	1	0.0118
													59.841	0.97	0.011446
													59.9008	0.85	0.01003
													59.9605	0.79	0.009322
													60.0202	0.77	0.009086
													60.0799	0.7	0.00826
													60.1396	0.6	0.00708
													60.1994	0.57	0.006726
													60.2591	0.51	0.006018
													60.3188	0.49	0.005782
													60.3785	0.43	0.005074
													60.4382	0.38	0.004484
													60.498	0.36	0.004248
													60.5577	0.31	0.003658
													60.6174	0.28	0.003304
													60.6771	0.25	0.00295
													60.7369	0.28	0.003304
													60.7966	0.21	0.002478
													60.8563	0.22	0.002596
													60.916	0.22	0.002596
													60.9758	0.19	0.002242
													61.0355	0.2	0.00236
													61.0952	0.23	0.002714
													61.1549	0.54	0.006372
													61.2146	2.14	0.025252
													61.2744	2.24	0.026432
													61.3341	2.19	0.025842
													61.3938	2.15	0.02537
													61.4535	2.04	0.024072
													61.5132	1.96	0.023128
													61.573	1.93	0.022774
													61.6327	1.76	0.020768
													61.6924	1.72	0.020296
													61.7521	1.63	0.019234
													61.8119	1.52	0.017936
													61.8716	1.41	0.016638
													61.9313	1.35	0.01593
													61.991	1.27	0.014986
													62.0507	1.22	0.014396
													62.1105	1.19	0.014042
													62.1702	1.09	0.012862
													62.2299	1.06	0.012508
													62.2896	0.96	0.011328
													62.3493	0.87	0.010266
													62.4091	0.85	0.01003
													62.4688	0.72	0.008496
													62.5285	0.64	0.007552
													62.5883	0.63	0.007434
													62.648	0.55	0.00649
													62.7077	0.46	0.005428
													62.7674	0.41	0.004838
													62.8271	0.33	0.003894
													62.8869	0.31	0.003658
													62.9466	0.36	0.004248
													63.0063	0.31	0.003658
													63.066	0.27	0.003186
													63.1258	0.24	0.002832
													63.1855	0.28	0.003304
													63.2452	0.33	0.003894
													63.3049	0.32	0.003776
													63.3646	0.24	0.002832
													63.4243	0.25	0.00295
													63.4841	0.23	0.002714
													63.5438	0.24	0.002832
													63.6035	0.26	0.003068
													63.6633	0.22	0.002596
													63.723	0.4	0.00472
													63.7827	1.75	0.02065
													63.8424	1.86	0.021948
													63.9021	1.72	0.020296
													63.9619	1.6	0.01888
													64.0216	1.65	0.01947
													64.0813	1.47	0.017346
													64.141	1.37	0.016166
													64.2007	1.32	0.015576
													64.2605	1.15	0.01357
													64.3202	1.15	0.01357
													64.3799	1.03	0.012154
													64.4396	0.88	0.010384
													64.4993	0.79	0.009322
													64.5591	0.72	0.008496
													64.6188	0.56	0.006608
													64.6785	0.55	0.00649
													64.7382	0.51	0.006018
													64.798	0.41	0.004838
													64.8577	0.43	0.005074
													64.9174	1.67	0.019706
													64.9771	1.72	0.020296
													65.0368	1.63	0.019234
													65.0966	1.54	0.018172
													65.1563	1.37	0.016166
													65.216	1.15	0.01357
													65.2757	1.22	0.014396
													65.3372	1.06	0.012508
													65.3952	0.11	0.001298
													65.4549	0.11	0.001298
													65.5146	0.11	0.001298
													65.5744	0.11	0.001298
													65.6341	2.72	0.032096
													65.6938	0.97	0.011446
													65.7535	0.61	0.007198
													65.8132	0.48	0.005664
													65.873	0.45	0.00531
													65.9327	0.4	0.00472
													65.9924	0.39	0.004602
													66.0521	2.28	0.026904
													66.1118	2.45	0.02891
													66.1716	2.28	0.026904
													66.2313	2.23	0.026314
													66.291	2.11	0.024898
													66.3507	2.1	0.02478
													66.4104	1.85	0.02183
													66.4702	1.67	0.019706
													66.5299	1.42	0.016756
													66.5896	1.41	0.016638
													66.6493	1.41	0.016638
													66.709	1.01	0.011918
													66.7688	0.99	0.011682
													66.8285	0.99	0.011682
													66.8882	0.9	0.01062
													66.9479	0.71	0.008378
													67.0076	0.73	0.008614
													67.0674	0.66	0.007788
													67.1271	0.56	0.006608
													67.1868	0.5	0.0059
													67.2465	0.51	0.006018
													67.3062	0.35	0.00413
													67.366	0.36	0.004248
													67.4257	0.32	0.003776
													67.4854	0.32	0.003776
													67.5451	0.35	0.00413
													67.6049	0.34	0.004012
													67.6646	0.28	0.003304
													67.7243	0.33	0.003894
													67.784	1.03	0.012154
													67.8437	1.14	0.013452
													67.9035	1.13	0.013334
													67.9632	1	0.0118
													68.0229	0.83	0.009794
													68.0826	0.75	0.00885
													68.1423	0.8	0.00944
													68.2021	0.87	0.010266
													68.2618	0.91	0.010738
													68.3215	2.51	0.029618
													68.3812	2.73	0.032214
													68.4409	3.34	0.039412
													68.5007	4.98	0.058764
													68.5604	5.46	0.064428
													68.6201	5.64	0.066552
													68.6798	5.87	0.069266
													68.7396	6.01	0.070918
													68.7993	6.17	0.072806
													68.859	6.18	0.072924
													68.9187	6.02	0.071036
													68.9784	6.14	0.072452
													69.0382	6.08	0.071744
													69.0979	6.23	0.073514
													69.1576	6.16	0.072688
													69.2173	6.25	0.07375
													69.277	6.18	0.072924
													69.3368	6.26	0.073868
													69.3965	6.13	0.072334
													69.4562	6.08	0.071744
													69.5159	6.11	0.072098
													69.5757	6.07	0.071626
													69.6354	5.88	0.069384
													69.6951	2.31	0.027258
													69.7548	1.5	0.0177
													69.8145	1.36	0.016048
													69.8743	1.27	0.014986
													69.934	1.11	0.013098
													69.9937	1.15	0.01357
													70.0534	1	0.0118
													70.1132	0.97	0.011446
													70.1729	0.94	0.011092
													70.2326	0.82	0.009676
													70.2923	0.78	0.009204
													70.3521	0.74	0.008732
													70.4118	0.75	0.00885
													70.4715	0.72	0.008496
													70.5312	0.81	0.009558
													70.5909	0.65	0.00767
													70.6507	0.61	0.007198
													70.7104	0.63	0.007434
													70.7701	1.44	0.016992
													70.8298	0.11	0.001298
													70.8895	0.55	0.00649
													70.9493	1.12	0.013216
													71.009	1.42	0.016756
													71.0687	1.57	0.018526
													71.1284	1.89	0.022302
													71.1881	1.96	0.023128
													71.2479	2.02	0.023836
													71.3076	2.32	0.027376
													71.3673	2.26	0.026668
													71.427	2.43	0.028674
													71.4868	2.54	0.029972
													71.5465	2.63	0.031034
													71.6062	2.63	0.031034
													71.6659	2.67	0.031506
													71.7256	2.63	0.031034
													71.7854	2.6	0.03068
													71.8451	2.72	0.032096
													71.9048	2.85	0.03363
													71.9645	2.84	0.033512
													72.0243	2.73	0.032214
													72.084	2.96	0.034928
													72.1437	2.87	0.033866
													72.2034	2.91	0.034338
													72.2631	2.96	0.034928
													72.3229	2.98	0.035164
													72.3826	3	0.0354
													72.4423	2.99	0.035282
													72.5021	3.1	0.03658
													72.5618	3.17	0.037406
													72.6215	3.21	0.037878
													72.6812	3.19	0.037642
													72.7409	3.15	0.03717
													72.8006	3.17	0.037406
													72.8604	3.25	0.03835
													72.9201	3.27	0.038586
													72.9798	3.35	0.03953
													73.0395	3.26	0.038468
													73.0993	3.28	0.038704
													73.159	3.29	0.038822
													73.2187	3.21	0.037878
													73.2784	3.39	0.040002
													73.3382	2.64	0.031152
													73.3979	1.73	0.020414
													73.4576	1.64	0.019352
													73.5173	1.64	0.019352
													73.577	1.62	0.019116
													73.6368	1.61	0.018998
													73.6965	1.73	0.020414
													73.7562	1.69	0.019942
													73.8159	1.79	0.021122
													73.8756	1.74	0.020532
													73.9354	1.7	0.02006
													73.9951	1.73	0.020414
													74.0548	1.69	0.019942
													74.1145	1.73	0.020414
													74.1743	1.74	0.020532
													74.234	1.78	0.021004
													74.2937	1.79	0.021122
													74.3534	1.92	0.022656
													74.4131	1.78	0.021004
													74.4729	1.79	0.021122
													74.5326	1.87	0.022066
													74.5923	1.8	0.02124
													74.6521	1.75	0.02065
													74.7118	1.74	0.020532
													74.7715	1.85	0.02183
													74.8312	1.93	0.022774
													74.8909	1.88	0.022184
													74.9507	1.86	0.021948
													75.0104	1.96	0.023128
													75.0701	0.76	0.008968
													75.1298	0.1	0.00118
													75.1895	1	0.0118
													75.2492	0.21	0.002478
													75.309	0.25	0.00295
													75.3687	0.21	0.002478
													75.4284	0.25	0.00295
													75.4881	0.25	0.00295
													75.5478	0.24	0.002832
													75.6076	0.31	0.003658
													75.6673	0.26	0.003068
													75.727	0.28	0.003304
													75.7867	0.28	0.003304
													75.8465	0.28	0.003304
													75.9062	0.27	0.003186
													75.9659	0.27	0.003186
													76.0256	0.24	0.002832
													76.0853	0.27	0.003186
													76.1451	0.29	0.003422
													76.2048	0.27	0.003186
													76.2645	0.31	0.003658
													76.3242	0.3	0.00354
													76.3839	0.29	0.003422
													76.4437	0.31	0.003658
													76.5034	0.26	0.003068
													76.5631	0.31	0.003658
													76.6228	0.3	0.00354
													76.6825	0.31	0.003658
													76.7423	0.3	0.00354
													76.802	0.31	0.003658
													76.8617	0.37	0.004366
													76.9214	0.41	0.004838
													76.9811	0.42	0.004956
													77.0409	0.4	0.00472
													77.1006	0.36	0.004248
													77.1603	0.46	0.005428
													77.22	0.44	0.005192
													77.2797	0.52	0.006136
													77.3395	0.47	0.005546
													77.3992	0.48	0.005664
													77.4589	0.54	0.006372
													77.5186	0.57	0.006726
													77.5784	0.58	0.006844
													77.6381	0.53	0.006254
													77.6978	0.55	0.00649
													77.7575	0.66	0.007788
													77.8172	0.64	0.007552
													77.877	0.65	0.00767
													77.9367	0.7	0.00826
													77.9964	0.7	0.00826
													78.0561	0.68	0.008024
													78.1158	0.67	0.007906
													78.1756	0.79	0.009322
													78.2353	0.69	0.008142
													78.295	0.74	0.008732
													78.3547	0.74	0.008732
													78.4145	0.81	0.009558
													78.4742	0.69	0.008142
													78.5339	0.81	0.009558
													78.5936	0.77	0.009086
													78.6534	0.73	0.008614
													78.7131	0.77	0.009086
													78.7728	0.79	0.009322
													78.8325	0.86	0.010148
													78.8922	0.84	0.009912
													78.952	0.82	0.009676
													79.0117	0.87	0.010266
													79.0714	0.83	0.009794
													79.1311	0.92	0.010856
													79.1908	0.84	0.009912
													79.2506	0.88	0.010384
													79.3103	0.84	0.009912
													79.37	0.94	0.011092
													79.4297	0.87	0.010266
													79.4894	0.87	0.010266
													79.5492	0.87	0.010266
													79.6089	0.18	0.002124
													79.6686	0.25	0.00295
													79.7283	0.2	0.00236
													79.7881	0.23	0.002714
													79.8478	0.21	0.002478
													79.9075	0.21	0.002478
													79.9672	0.25	0.00295
													80.0269	0.22	0.002596
													80.0867	0.22	0.002596
													80.1464	0.23	0.002714
													80.2061	0.2	0.00236
													80.2658	0.23	0.002714
													80.3256	0.22	0.002596
													80.3853	0.23	0.002714
													80.445	0.24	0.002832
													80.5047	0.21	0.002478
													80.5644	0.24	0.002832
													80.6242	0.26	0.003068
													80.6839	0.25	0.00295
													80.7436	0.26	0.003068
													80.8033	0.22	0.002596
													80.8631	0.23	0.002714
													80.9228	0.2	0.00236
													80.9825	0.23	0.002714
													81.0422	0.23	0.002714
													81.1019	0.23	0.002714
													81.1617	0.21	0.002478
													81.2214	0.22	0.002596
													81.2811	0.24	0.002832
													81.3409	0.22	0.002596
													81.4006	0.25	0.00295
													81.4603	0.25	0.00295
													81.52	0.25	0.00295
													81.5797	0.3	0.00354
													81.6395	0.24	0.002832
													81.6992	0.24	0.002832
													81.7589	0.26	0.003068
													81.8186	0.27	0.003186
													81.8783	0.24	0.002832
													81.9381	0.26	0.003068
													81.9978	0.28	0.003304
													82.0575	0.24	0.002832
													82.1172	0.24	0.002832
													82.177	0.25	0.00295
													82.2367	0.28	0.003304
													82.2964	0.27	0.003186
													82.3561	0.22	0.002596
													82.4158	0.26	0.003068
													82.4755	0.26	0.003068
													82.5353	0.24	0.002832
													82.595	0.27	0.003186
													82.6547	0.29	0.003422
													82.7145	0.24	0.002832
													82.7742	0.23	0.002714
													82.8339	0.24	0.002832
													82.8936	0.25	0.00295
													82.9533	0.28	0.003304
													83.013	0.23	0.002714
													83.0728	0.26	0.003068
													83.1325	0.28	0.003304
													83.1922	0.31	0.003658
													83.2519	0.25	0.00295
													83.3117	0.27	0.003186
													83.3714	0.27	0.003186
													83.4311	0.25	0.00295
													83.4908	0.24	0.002832
													83.5505	0.3	0.00354
													83.6103	0.3	0.00354
													83.67	0.29	0.003422
													83.7297	0.32	0.003776
													83.7894	0.32	0.003776
													83.8492	0.29	0.003422
													83.9089	0.3	0.00354
													83.9686	0.3	0.00354
													84.0283	0.33	0.003894
													84.088	0.3	0.00354
													84.1478	0.27	0.003186
													84.2075	0.3	0.00354
													84.2672	0.34	0.004012
													84.3269	0.31	0.003658
													84.3867	0.34	0.004012
													84.4464	0.36	0.004248
													84.5061	0.34	0.004012
													84.5658	0.33	0.003894
													84.6255	0.41	0.004838
													84.6853	0.38	0.004484
													84.745	0.28	0.003304
													84.8047	0.32	0.003776
													84.8644	0.31	0.003658
													84.9241	0.33	0.003894
													84.9839	0.32	0.003776
													85.0436	0.36	0.004248
													85.1033	0.32	0.003776
													85.163	0.33	0.003894
													85.2227	0.33	0.003894
													85.2825	0.39	0.004602
													85.3422	0.36	0.004248
													85.4019	0.33	0.003894
													85.4616	0.33	0.003894
													85.5213	0.35	0.00413
													85.5811	0.32	0.003776
													85.6408	0.39	0.004602
													85.7005	0.33	0.003894
													85.7602	0.36	0.004248
													85.8199	0.32	0.003776
													85.8797	0.33	0.003894
													85.9394	0.39	0.004602
													85.9991	0.38	0.004484
													86.0588	0.37	0.004366
													86.1185	0.37	0.004366
													86.1783	0.4	0.00472
													86.238	0.4	0.00472
													86.2977	0.38	0.004484
													86.3574	0.35	0.00413
													86.4172	0.38	0.004484
													86.4769	0.35	0.00413
													86.5366	0.39	0.004602
													86.5963	0.41	0.004838
													86.656	0.39	0.004602
													86.7158	0.32	0.003776
													86.7755	0.39	0.004602
													86.8352	0.38	0.004484
													86.8949	0.38	0.004484
													86.9546	0.34	0.004012
													87.0144	0.34	0.004012
													87.0741	0.31	0.003658
													87.1338	0.34	0.004012
													87.1935	0.32	0.003776
													87.2533	0.3	0.00354
													87.313	0.31	0.003658
													87.3727	0.35	0.00413
													87.4324	0.33	0.003894
													87.4921	0.28	0.003304
													87.5519	0.32	0.003776
													87.6116	0.35	0.00413
													87.6713	0.33	0.003894
													87.7311	0.31	0.003658
													87.7908	0.78	0.009204
													87.8505	1.26	0.014868
													87.9102	1.48	0.017464
													87.9699	1.6	0.01888
													88.0296	1.59	0.018762
													88.0894	1.73	0.020414
													88.1491	1.71	0.020178
													88.2088	1.65	0.01947
													88.2685	1.65	0.01947
													88.3282	1.65	0.01947
													88.388	1.72	0.020296
													88.4477	1.66	0.019588
													88.5074	1.64	0.019352
													88.5671	1.64	0.019352
													88.6269	1.59	0.018762
													88.6866	1.43	0.016874
													88.7463	1.53	0.018054
													88.806	1.49	0.017582
													88.8657	1.42	0.016756
													88.9255	1.5	0.0177
													88.9852	1.47	0.017346
													89.0449	1.45	0.01711
													89.1046	1.44	0.016992
													89.1644	1.55	0.01829
													89.2241	1.43	0.016874
													89.2838	1.37	0.016166
													89.3435	1.45	0.01711
													89.4032	1.4	0.01652
													89.463	1.41	0.016638
													89.5227	1.4	0.01652
													89.5824	1.36	0.016048
													89.6421	1.38	0.016284
													89.7018	1.47	0.017346
													89.7616	1.38	0.016284
													89.8213	1.38	0.016284
													89.881	1.42	0.016756
													89.9407	1.33	0.015694
													90.0005	1.35	0.01593
													90.0602	1.3	0.01534
													90.1199	1.35	0.01593
													90.1796	1.42	0.016756
													90.2393	1.4	0.01652
													90.2991	1.32	0.015576
													90.3588	1.23	0.014514
													90.4185	1.2	0.01416
													90.4782	1.32	0.015576
													90.538	1.22	0.014396
													90.5977	1.28	0.015104
													90.6574	1.2	0.01416
													90.7171	1.25	0.01475
													90.7768	1.22	0.014396
													90.8366	1.23	0.014514
													90.8963	1.18	0.013924
													90.956	1.24	0.014632
													91.0157	1.27	0.014986
													91.0755	1.15	0.01357
													91.1352	1.19	0.014042
													91.1949	1.32	0.015576
													91.2546	1.23	0.014514
													91.3143	1.26	0.014868
													91.3741	1.12	0.013216
													91.4338	1.15	0.01357
													91.4935	1.14	0.013452
													91.5532	1.1	0.01298
													91.613	1.12	0.013216
													91.6727	1.11	0.013098
													91.7324	1.14	0.013452
													91.7921	1.19	0.014042
													91.8518	1.19	0.014042
													91.9116	1.12	0.013216
													91.9713	1.15	0.01357
													92.031	1.24	0.014632
													92.0907	1.25	0.01475
													92.1505	1.19	0.014042
													92.2102	1.27	0.014986
													92.2699	1.17	0.013806
													92.3297	1.13	0.013334
													92.3893	1.13	0.013334
													92.4491	1.15	0.01357
													92.5088	1.08	0.012744
													92.5685	1.07	0.012626
													92.6283	1.09	0.012862
													92.688	1.04	0.012272
													92.7477	1.04	0.012272
													92.8074	0.99	0.011682
													92.8671	0.95	0.01121
													92.9269	0.99	0.011682
													92.9866	0.1	0.00118
													93.0463	0.51	0.006018
													93.106	0.63	0.007434
													93.1657	0.7	0.00826
													93.2255	0.82	0.009676
													93.2852	0.98	0.011564
													93.3449	0.99	0.011682
													93.4046	1	0.0118
													93.4643	1.12	0.013216
													93.5241	1.11	0.013098
													93.5838	1.13	0.013334
													93.6435	1.14	0.013452
													93.7032	1.16	0.013688
													93.7629	1.13	0.013334
													93.8227	1.19	0.014042
													93.8824	1.31	0.015458
													93.9421	1.22	0.014396
													94.0018	1.21	0.014278
													94.0615	1.24	0.014632
													94.1213	1.24	0.014632
													94.181	1.25	0.01475
													94.2407	1.2	0.01416
													94.3004	1.23	0.014514
													94.3601	1.35	0.01593
													94.4199	1.29	0.015222
													94.4796	1.16	0.013688
													94.5393	1.25	0.01475
													94.599	1.17	0.013806
													94.6587	1.26	0.014868
													94.7185	1.24	0.014632
													94.7782	1.11	0.013098
													94.8379	1.15	0.01357
													94.8976	1.17	0.013806
													94.9574	1.14	0.013452
													95.0171	1.14	0.013452
													95.0768	1.14	0.013452
													95.1365	1.19	0.014042
													95.1962	1.16	0.013688
													95.256	1.19	0.014042
													95.3157	1.25	0.01475
													95.3754	1.14	0.013452
													95.4351	1.14	0.013452
													95.4948	1.14	0.013452
													95.5546	1.22	0.014396
													95.6143	1.25	0.01475
													95.674	1.17	0.013806
													95.7337	1.22	0.014396
													95.7935	1.22	0.014396
													95.8532	1.22	0.014396
													95.9129	1.19	0.014042
													95.9726	1.19	0.014042
													96.0323	1.36	0.016048
													96.0921	1.18	0.013924
													96.1518	1.12	0.013216
													96.2115	1.17	0.013806
													96.2712	1.16	0.013688
													96.3309	1.13	0.013334
													96.3907	1.21	0.014278
													96.4504	1.25	0.01475
													96.5101	1.22	0.014396
													96.5698	1.25	0.01475
													96.6296	1.22	0.014396
													96.6893	1.22	0.014396
													96.749	1.3	0.01534
													96.8087	1.25	0.01475
													96.8684	1.23	0.014514
													96.9282	1.29	0.015222
													96.9879	1.29	0.015222
													97.0476	1.23	0.014514
													97.1073	1.27	0.014986
													97.167	1.28	0.015104
													97.2268	1.25	0.01475
													97.2865	1.23	0.014514
													97.3462	1.24	0.014632
													97.4059	1.23	0.014514
													97.4657	1.14	0.013452
													97.5254	1.32	0.015576
													97.5851	1.31	0.015458
													97.6449	1.16	0.013688
													97.7045	1.18	0.013924
													97.7643	1.19	0.014042
													97.824	1.26	0.014868
													97.8837	1.12	0.013216
													97.9434	1.17	0.013806
													98.0032	1.15	0.01357
													98.0629	1.21	0.014278
													98.1226	1.22	0.014396
													98.1823	1.2	0.01416
													98.242	1.25	0.01475
													98.3018	1.2	0.01416
													98.3615	1.18	0.013924
													98.4212	1.18	0.013924
													98.4809	1.27	0.014986
													98.5406	1.27	0.014986
													98.6004	1.35	0.01593
													98.6601	1.37	0.016166
													98.7198	1.24	0.014632
													98.7795	1.24	0.014632
													98.8393	1.31	0.015458
													98.899	1.41	0.016638
													98.9587	1.27	0.014986
													99.0185	1.33	0.015694
													99.0781	0.11	0.001298
													99.1379	0.1	0.00118
													99.1976	0.1	0.00118
													99.2573	0.19	0.002242
													99.317	0.29	0.003422
													99.3768	0.51	0.006018
													99.4365	0.76	0.008968
													99.4962	1.11	0.013098
													99.5559	1.38	0.016284
													99.6156	1.6	0.01888
													99.6754	1.74	0.020532
													99.7351	1.89	0.022302
													99.7948	2.13	0.025134
													99.8545	2.23	0.026314
													99.9143	2.33	0.027494
													99.974	2.41	0.028438
													100.034	2.44	0.028792
													100.093	2.59	0.030562
													100.153	2.57	0.030326
													100.213	2.62	0.030916
													100.273	2.64	0.031152
													100.332	2.8	0.03304
													100.392	2.69	0.031742
													100.452	2.73	0.032214
													100.511	2.84	0.033512
													100.571	2.91	0.034338
													100.631	2.9	0.03422
													100.691	2.9	0.03422
													100.75	2.96	0.034928
													100.81	2.97	0.035046
													100.87	2.96	0.034928
													100.93	3.06	0.036108
													100.989	3.04	0.035872
													101.049	3.09	0.036462
													101.109	3.05	0.03599
													101.168	3.05	0.03599
													101.228	3.14	0.037052
													101.288	3.17	0.037406
													101.348	3.22	0.037996
													101.407	3.15	0.03717
													101.467	3.19	0.037642
													101.527	3.23	0.038114
													101.586	3.19	0.037642
													101.646	3.24	0.038232
													101.706	3.25	0.03835
													101.766	3.2	0.03776
													101.825	3.23	0.038114
													101.885	3.24	0.038232
													101.945	3.31	0.039058
													102.005	3.27	0.038586
													102.064	3.32	0.039176
													102.124	3.28	0.038704
													102.184	3.36	0.039648
													102.243	3.31	0.039058
													102.303	3.28	0.038704
													102.363	3.32	0.039176
													102.423	3.35	0.03953
													102.482	3.31	0.039058
													102.542	3.42	0.040356
													102.602	3.33	0.039294
													102.661	3.41	0.040238
													102.721	3.39	0.040002
													102.781	3.42	0.040356
													102.841	3.38	0.039884
													102.9	3.34	0.039412
													102.96	3.46	0.040828
													103.02	3.43	0.040474
													103.08	3.44	0.040592
													103.139	3.46	0.040828
													103.199	3.45	0.04071
													103.259	3.41	0.040238
													103.318	3.42	0.040356
													103.378	3.43	0.040474
													103.438	3.5	0.0413
													103.498	3.58	0.042244
													103.557	3.47	0.040946
													103.617	3.51	0.041418
													103.677	3.55	0.04189
													103.736	3.58	0.042244
													103.796	3.5	0.0413
													103.856	3.53	0.041654
													103.916	3.56	0.042008
													103.975	3.62	0.042716
													104.035	3.59	0.042362
													104.095	3.6	0.04248
													104.154	3.58	0.042244
													104.214	3.52	0.041536
													104.274	3.57	0.042126
													104.334	3.55	0.04189
													104.393	3.7	0.04366
													104.453	3.63	0.042834
													104.513	3.72	0.043896
													104.573	3.73	0.044014
													104.632	3.77	0.044486
													104.692	3.78	0.044604
													104.752	3.76	0.044368
													104.811	3.7	0.04366
													104.871	3.79	0.044722
													104.931	3.8	0.04484
													104.991	3.75	0.04425
													105.05	3.75	0.04425
													105.11	3.72	0.043896
													105.17	3.79	0.044722
													105.229	3.78	0.044604
													105.289	3.78	0.044604
													105.349	3.82	0.045076
													105.409	3.82	0.045076
													105.468	3.83	0.045194
													105.528	3.85	0.04543
													105.588	3.89	0.045902
													105.648	3.8	0.04484
													105.707	3.87	0.045666
													105.767	3.89	0.045902
													105.827	3.83	0.045194
													105.886	3.91	0.046138
													105.946	3.92	0.046256
													106.006	3.85	0.04543
													106.066	3.9	0.04602
													106.125	3.88	0.045784
													106.185	3.85	0.04543
													106.245	3.87	0.045666
													106.304	3.88	0.045784
													106.364	3.88	0.045784
													106.424	3.95	0.04661
													106.484	3.95	0.04661
													106.543	3.94	0.046492
													106.603	3.94	0.046492
													106.663	3.91	0.046138
													106.723	3.98	0.046964
													106.782	3.99	0.047082
													106.842	3.91	0.046138
													106.902	3.99	0.047082
													106.961	3.94	0.046492
													107.021	3.94	0.046492
													107.081	3.93	0.046374
													107.141	3.92	0.046256
													107.2	3.92	0.046256
													107.26	3.98	0.046964
													107.32	3.97	0.046846
													107.379	3.99	0.047082
													107.439	3.97	0.046846
													107.499	3.94	0.046492
													107.559	4.01	0.047318
													107.618	4.03	0.047554
													107.678	3.94	0.046492
													107.738	4.03	0.047554
													107.797	4.02	0.047436
													107.857	3.99	0.047082
													107.917	4.02	0.047436
													107.977	4.11	0.048498
													108.036	4.17	0.049206
													108.096	4.15	0.04897
													108.156	4.04	0.047672
													108.216	4.06	0.047908
													108.275	4.18	0.049324
													108.335	4.13	0.048734
													108.395	4.21	0.049678
													108.454	4.18	0.049324
													108.514	4.22	0.049796
													108.574	4.24	0.050032
													108.634	4.25	0.05015
													108.693	4.19	0.049442
													108.753	4.21	0.049678
													108.813	4.32	0.050976
													108.872	4.29	0.050622
													108.932	4.29	0.050622
													108.992	4.25	0.05015
													109.052	4.29	0.050622
													109.111	4.29	0.050622
													109.171	4.3	0.05074
													109.231	4.3	0.05074
													109.291	4.37	0.051566
													109.35	4.34	0.051212
													109.41	4.33	0.051094
													109.47	4.34	0.051212
													109.529	4.33	0.051094
													109.589	4.31	0.050858
													109.649	4.36	0.051448
													109.709	4.44	0.052392
													109.768	4.49	0.052982
													109.828	4.3	0.05074
													109.888	4.32	0.050976
													109.948	4.45	0.05251
													110.007	4.41	0.052038
													110.067	4.42	0.052156
													110.127	4.42	0.052156
													110.186	4.44	0.052392
													110.246	4.46	0.052628
													110.306	4.51	0.053218
													110.366	4.5	0.0531
													110.425	4.45	0.05251
													110.485	4.52	0.053336
													110.545	4.49	0.052982
													110.604	4.39	0.051802
													110.664	4.51	0.053218
													110.724	4.4	0.05192
													110.784	4.47	0.052746
													110.843	4.49	0.052982
													110.903	4.52	0.053336
													110.963	4.45	0.05251
													111.022	4.49	0.052982
													111.082	4.54	0.053572
													111.142	4.47	0.052746
													111.202	4.39	0.051802
													111.261	4.43	0.052274
													111.321	4.4	0.05192
													111.381	4.35	0.05133
													111.441	4.43	0.052274
													111.5	4.38	0.051684
													111.56	4.37	0.051566
													111.62	4.36	0.051448
													111.679	4.31	0.050858
													111.739	4.38	0.051684
													111.799	4.35	0.05133
													111.859	4.36	0.051448
													111.918	4.3	0.05074
													111.978	4.29	0.050622
													112.038	4.32	0.050976
													112.097	4.29	0.050622
													112.157	4.37	0.051566
													112.217	4.28	0.050504
													112.277	4.37	0.051566
													112.336	4.34	0.051212
													112.396	4.32	0.050976
													112.456	4.34	0.051212
													112.516	4.33	0.051094
													112.575	4.29	0.050622
													112.635	4.3	0.05074
													112.695	4.33	0.051094
													112.754	4.3	0.05074
													112.814	4.31	0.050858
													112.874	4.33	0.051094
													112.934	4.29	0.050622
													112.993	4.38	0.051684
													113.053	4.3	0.05074
													113.113	4.3	0.05074
													113.172	4.22	0.049796
													113.232	4.29	0.050622
													113.292	4.24	0.050032
													113.352	4.25	0.05015
													113.411	4.21	0.049678
													113.471	4.14	0.048852
													113.531	4.28	0.050504
													113.59	4.13	0.048734
													113.65	4.18	0.049324
													113.71	4.11	0.048498
													113.77	4.2	0.04956
													113.829	4.2	0.04956
													113.889	4.24	0.050032
													113.949	4.15	0.04897
													114.009	4.1	0.04838
													114.068	4.16	0.049088
													114.128	4.19	0.049442
													114.188	4.17	0.049206
													114.247	4.18	0.049324
													114.307	4.07	0.048026
													114.367	4.1	0.04838
													114.427	4.1	0.04838
													114.486	4.09	0.048262
													114.546	3.79	0.044722
													114.606	0.57	0.006726
													114.665	1.33	0.015694
													114.725	1.91	0.022538
													114.785	2.18	0.025724
													114.845	2.36	0.027848
													114.904	2.48	0.029264
													114.964	2.57	0.030326
													115.024	2.67	0.031506
													115.084	2.73	0.032214
													115.143	2.64	0.031152
													115.203	2.67	0.031506
													115.263	2.69	0.031742
													115.322	2.75	0.03245
													115.382	2.72	0.032096
													115.442	2.68	0.031624
													115.502	2.72	0.032096
													115.561	2.71	0.031978
													115.621	2.67	0.031506
													115.681	2.64	0.031152
													115.74	2.53	0.029854
													115.8	2.54	0.029972
													115.86	2.55	0.03009
													115.92	2.59	0.030562
													115.979	2.51	0.029618
													116.039	2.44	0.028792
													116.099	2.48	0.029264
													116.159	2.4	0.02832
													116.218	2.35	0.02773
													116.278	2.28	0.026904
													116.338	2.44	0.028792
													116.397	2.28	0.026904
													116.457	2.24	0.026432
													116.517	2.2	0.02596
													116.577	2.18	0.025724
													116.636	2.09	0.024662
													116.696	2.06	0.024308
													116.756	2.02	0.023836
													116.815	2.08	0.024544
													116.875	2	0.0236
													116.935	2.01	0.023718
													116.995	2	0.0236
													117.054	2.03	0.023954
													117.114	2.04	0.024072
													117.174	1.95	0.02301
													117.234	2	0.0236
													117.293	1.93	0.022774
													117.353	1.92	0.022656
													117.413	1.96	0.023128
													117.472	2.03	0.023954
													117.532	2.02	0.023836
													117.592	2.07	0.024426
													117.652	2	0.0236
													117.711	2.03	0.023954
													117.771	2.05	0.02419
													117.831	2.11	0.024898
													117.89	2.08	0.024544
													117.95	2.07	0.024426
													118.01	2.1	0.02478
													118.07	2.03	0.023954
													118.129	2.07	0.024426
													118.189	2.05	0.02419
													118.249	2.12	0.025016
													118.309	2.14	0.025252
													118.368	2.17	0.025606
													118.428	2.15	0.02537
													118.488	2.15	0.02537
													118.547	2.17	0.025606
													118.607	2.13	0.025134
													118.667	2.22	0.026196
													118.727	2.15	0.02537
													118.786	2.11	0.024898
													118.846	2.08	0.024544
													118.906	2.13	0.025134
													118.965	2.13	0.025134
													119.025	2.13	0.025134
													119.085	2.15	0.02537
													119.145	2.1	0.02478
													119.204	2.09	0.024662
													119.264	2.11	0.024898
													119.324	2.12	0.025016
[truncated: 679 more rows]

## Sheet: Gas cultivation 4
Ferm. Samples (internal # 33)								Manually adjusted gasflow					Hcp 1.18 mM/atm		Dissolved Oxygen readout (1 point per 3 minutes)
Time [h]	OD600	STD OD600	gcdw [g/L]	PHB [%] of CDW	STD PHB [%] of CDW	(NH4)2SO4 [g/L]		h	CO2 [NmL/min]	H2 [NmL/min]	O2 [NmL/min]	pO2 [atm]	O* at t [mM]		Time [h]	DO [% saturation]	DO [mM]
0	0.155	0.146135	0.038068			1.53308		0.0527824	10	85	2	0.0206186	0.0243299		0.2207	2.0316	0.0239729
3.66667	0.96	0	0.235776			1.47566		0.073613	10	85	2	0.0206186	0.0243299		0.2763	2.037	0.0240366
18.5833	3.075	0.0433013	0.75522	9.19005	0	1.15796		3.80829	10	85	2	0.0206186	0.0243299		0.3318	1.9822	0.02339
22	3.15	0.05	0.77364			1.11726		3.80829	10	85	2	0.0206186	0.0243299		0.3874	1.9716	0.0232649
26.75	3.05	0.05	0.74908			1.17697		18.7318	10	85	2	0.0206186	0.0243299		0.4429	1.9575	0.0230985
42.75	4.5	0	1.1052	7.10969	0	0.715996		18.779	10	85	2	0.0206186	0.0243299		0.4985	1.9593	0.0231197
45	6.75	0.25	1.6578			0.331044		22.1428	10	85	2	0.0206186	0.0243299		0.5541	1.9452	0.0229534
51	12.5	0.353553	3.07			0.00296663		22.1817	10	85	2	0.0206186	0.0243299		0.6096	1.9385	0.0228743
55.4167	17.5	0.5	4.298	35.4324	0	-7.95637e-05		26.9733	10	85	2	0.0206186	0.0243299		0.6652	1.9333	0.0228129
66.4167	28.5	0.5	6.9996	62.6291	2.03676	-7.95637e-05		26.9761	10	85	2	0.0206186	0.0243299		0.7207	1.9286	0.0227575
78.25	38	0	9.3328			-7.95637e-05		30.3733	10	85	2	0.0206186	0.0243299		0.7763	1.9207	0.0226643
90.75	44.5	0.866025	10.9292	80.3583	2.32491	-7.95637e-05		30.39	10	85	3	0.0306122	0.0361224		0.8318	1.9175	0.0226265
99	47	1	11.5432	76.1814	2.42958	-7.95637e-05		30.4677	10	85	3	0.0306122	0.0361224		0.8874	1.9216	0.0226749
116	50	0	12.28	80.7934	1.58151	-7.95637e-05		30.4844	10	85	3.5	0.035533	0.0419289		0.9429	1.9172	0.022623
123	53.5	0.866025	13.1396	79.4004	1.31521	-7.95637e-05		35.2483	10	85	3.5	0.035533	0.0419289		0.9985	1.9137	0.0225817
136.083	54.5	0.866025	13.3852	76.7917	0.500884	-7.95637e-05		35.2371	10	85	3.5	0.035533	0.0419289		1.0541	1.9128	0.022571
146.583	55	1	13.508	77.9398	0	-7.95637e-05		35.2538	10	85	6	0.0594059	0.070099		1.1096	1.9073	0.0225061
								40.3565	10	85	6	0.0594059	0.070099		1.1652	1.9059	0.0224896
								40.3732	10	85	10	0.0952381	0.112381		1.2207	1.9006	0.0224271
								40.4107	10	85	10	0.0952381	0.112381		1.2763	1.8963	0.0223763
								40.4274	10	85	13	0.12037	0.142037		1.3318	1.8992	0.0224106
								40.444	10	85	13	0.12037	0.142037		1.3874	1.896	0.0223728
								40.4607	10	85	12	0.11215	0.132336		1.443	1.8879	0.0222772
								40.4496	10	85	12	0.11215	0.132336		1.4985	1.889	0.0222902
								40.4662	10	85	11	0.103774	0.122453		1.5541	1.8977	0.0223929
								40.4579	10	85	11	0.103774	0.122453		1.6096	1.8844	0.0222359
								40.4746	10	85	10	0.0952381	0.112381		1.6652	1.8777	0.0221569
								40.4635	10	85	10	0.0952381	0.112381		1.7207	1.8766	0.0221439
								40.5121	10	85	10	0.0952381	0.112381		1.7763	1.8714	0.0220825
								40.5482	10	85	10	0.0952381	0.112381		1.8318	1.8679	0.0220412
								40.5649	10	85	11	0.103774	0.122453		1.8874	1.8636	0.0219905
								40.5676	10	85	11	0.103774	0.122453		1.943	1.8665	0.0220247
								40.5843	10	85	12	0.11215	0.132336		1.9985	1.8601	0.0219492
								40.6024	10	85	12	0.11215	0.132336		2.0541	1.8535	0.0218713
								40.619	10	85	11	0.103774	0.122453		2.1096	1.8543	0.0218807
								40.6107	10	85	11	0.103774	0.122453		2.1652	1.8517	0.0218501
								40.6274	10	85	5	0.05	0.059		2.2207	1.8414	0.0217285
								40.6176	10	85	5	0.05	0.059		2.2763	1.8402	0.0217144
								40.6607	10	85	11	0.103774	0.122453		2.3318	1.8348	0.0216506
								40.7829	10	85	11	0.103774	0.122453		2.3874	1.8325	0.0216235
								40.7996	10	85	10	0.0952381	0.112381		2.443	1.8265	0.0215527
								40.851	10	85	10	0.0952381	0.112381		2.4985	1.8227	0.0215079
								40.8676	10	85	11	0.103774	0.122453		2.5541	1.8184	0.0214571
								41.0482	10	85	11	0.103774	0.122453		2.6096	1.8173	0.0214441
								41.0648	10	85	11.5	0.107981	0.127418		2.6652	1.8159	0.0214276
								41.4023	10	85	11.5	0.107981	0.127418		2.7207	1.8181	0.0214536
								41.419	10	85	11.5	0.107981	0.127418		2.7763	1.7984	0.0212211
								41.5135	10	85	11.5	0.107981	0.127418		2.8318	1.7985	0.0212223
								41.5135	10	85	11.5	0.107981	0.127418		2.8874	1.7925	0.0211515
								41.5301	10	85	12	0.11215	0.132336		2.9429	1.7868	0.0210842
								41.7982	10	85	12	0.11215	0.132336		2.9985	1.7819	0.0210264
								41.8148	10	85	13	0.12037	0.142037		3.0541	1.7754	0.0209497
								42.0371	10	85	13	0.12037	0.142037		3.1096	1.7689	0.020873
								42.0537	10	85	14	0.12844	0.15156		3.1652	1.7677	0.0208589
								42.3482	10	85	14	0.12844	0.15156		3.2207	1.7637	0.0208117
								42.4176	10	85	15	0.136364	0.160909		3.2763	1.7601	0.0207692
								42.8662	10	85	15	0.136364	0.160909		3.3318	1.7623	0.0207951
								42.8829	10	85	16	0.144144	0.17009		3.3874	1.7479	0.0206252
								43.1662	10	85	16	0.144144	0.17009		3.4429	1.7334	0.0204541
								43.1829	10	85	17	0.151786	0.179107		3.4985	1.7306	0.0204211
								43.3912	10	85	17	0.151786	0.179107		3.5541	1.7145	0.0202311
								43.4079	10	85	18	0.159292	0.187965		3.6096	1.7182	0.0202748
								43.5218	10	85	18	0.159292	0.187965		3.6652	1.7115	0.0201957
								43.5384	10	85	19	0.166667	0.196667		3.7207	1.7047	0.0201155
								43.8148	10	85	19	0.166667	0.196667		3.7763	1.6946	0.0199963
								43.8315	10	85	20	0.173913	0.205217		3.8318	1.6966	0.0200199
								44.094	10	85	20	0.173913	0.205217		3.8874	1.6921	0.0199668
								44.1107	10	85	21	0.181034	0.213621		3.9429	1.6926	0.0199727
								44.3162	10	85	21	0.181034	0.213621		3.9985	1.6806	0.0198311
								44.3329	10	85	22	0.188034	0.22188		4.0541	1.6789	0.019811
								44.6551	10	85	22	0.188034	0.22188		4.1096	1.6727	0.0197379
								44.6718	10	85	23	0.194915	0.23		4.1652	1.6688	0.0196918
								44.712	10	85	23	0.194915	0.23		4.2207	1.6554	0.0195337
								44.7287	10	85	25	0.208333	0.245833		4.2763	1.6552	0.0195314
								45.194	10	85	25	0.208333	0.245833		4.3318	1.6515	0.0194877
								45.2107	10	85	0	0	0		4.3874	1.6468	0.0194322
								45.2509	10	85	25	0.208333	0.245833		4.443	1.6435	0.0193933
								45.7537	10	85	25	0.208333	0.245833		4.4985	1.6351	0.0192942
								45.7704	20	200	0	0	0		4.5541	1.6368	0.0193142
								45.7787	20	100	0	0	0		4.6096	1.6246	0.0191703
								45.7815	20	200	0	0	0		4.6652	1.6227	0.0191479
								45.7745	20	200	0	0	0		4.7207	1.616	0.0190688
								45.7912	20	200	10	0.0434783	0.0513043		4.7763	1.6096	0.0189933
								45.7898	20	200	10	0.0434783	0.0513043		4.8318	1.6069	0.0189614
								45.8065	20	200	15	0.0638298	0.0753191		4.8874	1.6058	0.0189484
								45.8204	20	200	15	0.0638298	0.0753191		4.9429	1.6038	0.0189248
								45.837	20	200	20	0.0833333	0.0983333		4.9985	1.5939	0.018808
								45.8551	20	200	20	0.0833333	0.0983333		5.0541	1.5947	0.0188175
								45.8718	20	200	23	0.0946502	0.111687		5.1096	1.5911	0.018775
								45.8829	20	200	23	0.0946502	0.111687		5.1652	1.5986	0.0188635
								45.8995	20	200	25	0.102041	0.120408		5.2207	1.5911	0.018775
								45.9037	20	200	25	0.102041	0.120408		5.2763	1.5837	0.0186877
								45.9204	20	200	27	0.109312	0.128988		5.3318	1.5661	0.01848
								45.9357	20	200	27	0.109312	0.128988		5.3874	1.5721	0.0185508
								45.9523	20	200	29	0.116466	0.13743		5.4429	1.5705	0.0185319
								45.9829	20	200	29	0.116466	0.13743		5.4985	1.5593	0.0183997
								45.9829	20	200	31	0.123506	0.145737		5.5541	1.5582	0.0183868
								46.019	20	200	31	0.123506	0.145737		5.6096	1.5582	0.0183868
								46.019	20	200	33	0.130435	0.153913		5.6652	1.5467	0.0182511
								46.0495	20	200	33	0.130435	0.153913		5.7207	1.5431	0.0182086
								46.0495	20	200	36	0.140625	0.165937		5.7763	1.5412	0.0181862
								46.0954	20	200	36	0.140625	0.165937		5.8318	1.5371	0.0181378
								46.0954	20	200	38	0.147287	0.173798		5.8874	1.5379	0.0181472
								46.1134	20	200	38	0.147287	0.173798		5.943	1.5352	0.0181154
								46.1134	20	200	40	0.153846	0.181538		5.9985	1.5349	0.0181118
								46.1551	20	200	40	0.153846	0.181538		6.0541	1.5338	0.0180988
								46.1551	20	200	42	0.160305	0.18916		6.1127	1.5347	0.0181095
								46.169	20	200	42	0.160305	0.18916		6.1652	-0.0263	-0.00031034
								46.169	20	200	45	0.169811	0.200377		6.2207	1.2819	0.0151264
								46.2037	20	200	45	0.169811	0.200377		6.2763	1.5237	0.0179797
								46.2037	20	200	47	0.17603	0.207715		6.3318	1.5527	0.0183219
								46.2315	20	200	47	0.17603	0.207715		6.3874	1.5469	0.0182534
								46.2315	20	200	50	0.185185	0.218519		6.443	1.5303	0.0180575
								46.2648	20	200	50	0.185185	0.218519		6.4985	1.5187	0.0179207
								46.2648	20	200	53	0.194139	0.229084		6.5541	1.4941	0.0176304
								46.3329	20	200	53	0.194139	0.229084		6.6096	1.4888	0.0175678
								46.3329	20	200	55	0.2	0.236		6.6652	1.4775	0.0174345
								46.4718	20	200	55	0.2	0.236		6.7207	1.4748	0.0174026
								46.4718	20	200	57	0.205776	0.242816		6.7763	1.4632	0.0172658
								47.2301	20	200	57	0.205776	0.242816		6.8318	1.4497	0.0171065
								47.2301	20	200	58	0.208633	0.246187		6.8874	1.4454	0.0170557
								47.5718	20	200	58	0.208633	0.246187		6.943	1.4373	0.0169601
								47.5718	20	200	60	0.214286	0.252857		6.9985	1.429	0.0168622
								47.862	20	200	60	0.214286	0.252857		7.0541	1.4282	0.0168528
								47.862	20	200	58	0.208633	0.246187		7.1096	1.4148	0.0166946
								48.0204	20	200	58	0.208633	0.246187		7.1652	1.3961	0.016474
								48.0204	20	200	59	0.21147	0.249534		7.2207	1.3815	0.0163017
								48.4273	20	200	59	0.21147	0.249534		7.2763	1.3807	0.0162923
								48.4273	20	200	60	0.214286	0.252857		7.3318	1.3616	0.0160669
								50.3134	20	200	60	0.214286	0.252857		7.3874	1.3618	0.0160692
								50.3134	20	200	59	0.21147	0.249534		7.443	1.3475	0.0159005
								51.1939	20	200	59	0.21147	0.249534		7.4985	1.346	0.0158828
								51.1939	20	200	58	0.208633	0.246187		7.5541	1.3328	0.015727
								51.7467	20	200	58	0.208633	0.246187		7.6096	1.3204	0.0155807
								51.7467	20	100	58	0.325843	0.384494		7.6652	1.3099	0.0154568
								51.7509	20	100	58	0.325843	0.384494		7.7207	1.297	0.0153046
								51.7509	20	200	50	0.185185	0.218519		7.7763	1.2863	0.0151783
								51.7786	20	200	50	0.185185	0.218519		7.8318	1.286	0.0151748
								51.7786	20	200	55	0.2	0.236		7.8874	1.28	0.015104
								55.8175	20	200	55	0.2	0.236		7.9429	1.2591	0.0148574
								55.8175	20	200	55	0.2	0.236		7.9985	1.2555	0.0148149
								57.0675	20	200	55	0.2	0.236		8.0541	1.2386	0.0146155
								57.0675	20	200	50	0.185185	0.218519		8.1096	1.236	0.0145848
								57.13	20	200	50	0.185185	0.218519		8.1652	1.2109	0.0142886
								57.13	20	200	47	0.17603	0.207715		8.2207	1.2358	0.0145824
								64.6785	20	200	47	0.17603	0.207715		8.2763	1.2007	0.0141683
								64.6785	20	200	46	0.172932	0.20406		8.3318	1.1909	0.0140526
								66.5535	20	200	46	0.172932	0.20406		8.3874	1.1817	0.0139441
								66.5535	20	200	46	0.172932	0.20406		8.4429	1.1691	0.0137954
								66.6118	20	200	46	0.172932	0.20406		8.4985	1.1551	0.0136302
								66.6118	20	200	47	0.17603	0.207715		8.5541	1.1294	0.0133269
								67.5563	20	200	47	0.17603	0.207715		8.6096	1.1141	0.0131464
								67.5563	20	200	45	0.169811	0.200377		8.6652	1.0906	0.0128691
								70.9062	20	200	45	0.169811	0.200377		8.7207	1.0825	0.0127735
								70.9062	20	200	42	0.160305	0.18916		8.7763	1.0765	0.0127027
								78.495	20	200	42	0.160305	0.18916		8.8318	1.0444	0.0123239
								78.495	20	200	35	0.137255	0.161961		8.8874	1.0246	0.0120903
								86.7144	20	200	35	0.137255	0.161961		8.9429	1.0064	0.0118755
								86.7144	20	200	32	0.126984	0.149841		8.9985	0.994	0.0117292
								90.9866	20	200	32	0.126984	0.149841		9.0541	0.9739	0.011492
								90.9866	20	200	28	0.112903	0.133226		9.1096	0.9623	0.0113551
								90.9921	20	200	28	0.112903	0.133226		9.1652	0.9296	0.0109693
								90.9921	20	200	30	0.12	0.1416		9.2207	0.9091	0.0107274
								91.0727	20	200	30	0.12	0.1416		9.2763	0.8866	0.0104619
								91.0727	20	200	31	0.123506	0.145737		9.3318	0.865	0.010207
								91.7546	20	200	31	0.123506	0.145737		9.3874	0.8556	0.0100961
								91.7546	20	200	29	0.116466	0.13743		9.4429	0.8206	0.00968308
								99.1698	20	200	29	0.116466	0.13743		9.4985	0.8018	0.00946124
								99.1698	20	200	29	0.116466	0.13743		9.5541	0.7817	0.00922406
								99.2282	20	200	29	0.116466	0.13743		9.6096	0.728	0.0085904
								99.2282	20	200	29	0.116466	0.13743		9.6652	0.7313	0.00862934
								111.822	20	200	29	0.116466	0.13743		9.7207	0.7068	0.00834024
								111.822	20	200	27	0.109312	0.128988		9.7763	0.6798	0.00802164
								111.835	20	200	27	0.109312	0.128988		9.8318	0.6391	0.00754138
								111.835	20	200	26	0.105691	0.124715		9.8874	0.6317	0.00745406
								116.161	20	200	26	0.105691	0.124715		9.9429	0.6031	0.00711658
								116.161	20	200	26	0.105691	0.124715		9.9985	0.5773	0.00681214
								116.238	20	200	26	0.105691	0.124715		10.0541	0.5553	0.00655254
								116.238	20	200	25	0.102041	0.120408		10.1096	0.5192	0.00612656
								122.747	20	200	25	0.102041	0.120408		10.1652	0.5005	0.0059059
								122.747	20	200	25	0.102041	0.120408		10.2207	0.4652	0.00548936
								122.818	20	200	25	0.102041	0.120408		10.2763	0.4499	0.00530882
								122.818	20	200	26	0.105691	0.124715		10.3318	0.3925	0.0046315
								136.286	20	200	26	0.105691	0.124715		10.3874	0.3814	0.00450052
								136.286	20	200	26	0.105691	0.124715		10.4429	0.3513	0.00414534
								136.297	20	200	26	0.105691	0.124715		10.4985	0.329	0.0038822
								136.297	20	200	25	0.102041	0.120408		10.5541	0.2988	0.00352584
								142.869	20	200	25	0.102041	0.120408		10.6096	0.2707	0.00319426
								142.869	20	200	26	0.105691	0.124715		10.6652	0.2198	0.00259364
								145.707	20	200	26	0.105691	0.124715		10.7207	0.2164	0.00255352
								145.707	20	200	26	0.105691	0.124715		10.7763	0.1535	0.0018113
								145.757	20	200	26	0.105691	0.124715		10.8318	0.1543	0.00182074
								145.757	20	200	27	0.109312	0.128988		10.8874	0.0966	0.00113988
								145.967	20	200	27	0.109312	0.128988		10.943	0.0928	0.00109504
								145.967	20	200	27	0.109312	0.128988		10.9985	0.0444	0.00052392
								145.983	20	200	27	0.109312	0.128988		11.0541	0.0296	0.00034928
								146.583	20	200	27	0.109312	0.128988		11.1096	0.0228	0.00026904
															11.1652	0.0030611	3.6121e-05
															11.2207	-0.0052082	-6.14568e-05
															11.2763	-0.0027287	-3.21987e-05
															11.3318	0.0036819	4.34464e-05
															11.3874	-0.0058279	-6.87692e-05
															11.4429	-0.0085124	-0.000100446
															11.4985	-0.0050016	-5.90189e-05
															11.5541	-0.0039686	-4.68295e-05
															11.6096	-0.0108	-0.00012744
															11.6652	-0.0045885	-5.41443e-05
															11.7207	-0.0137	-0.00016166
															11.7763	-0.0114	-0.00013452
															11.8318	-0.0122	-0.00014396
															11.8874	-0.017	-0.0002006
															11.943	-0.0151	-0.00017818
															11.9985	-0.0124	-0.00014632
															12.0541	-0.0085124	-0.000100446
															12.1096	-0.0137	-0.00016166
															12.1652	-0.0149	-0.00017582
															12.2207	-0.0196	-0.00023128
															12.2763	-0.0147	-0.00017346
															12.3318	-0.017	-0.0002006
															12.3874	-0.0131	-0.00015458
															12.443	-0.018	-0.0002124
															12.4985	-0.0227	-0.00026786
															12.5541	-0.0194	-0.00022892
															12.6096	-0.0153	-0.00018054
															12.6652	-0.0164	-0.00019352
															12.7207	-0.0143	-0.00016874
															12.7763	-0.0182	-0.00021476
															12.8318	-0.0217	-0.00025606
															12.8874	-0.0145	-0.0001711
															12.9429	-0.0147	-0.00017346
															12.9985	-0.0172	-0.00020296
															13.0541	-0.0205	-0.0002419
															13.1096	-0.0236	-0.00027848
															13.1652	-0.0145	-0.0001711
															13.2207	-0.0128	-0.00015104
															13.2763	-0.0164	-0.00019352
															13.3318	-0.0151	-0.00017818
															13.3874	-0.0211	-0.00024898
															13.443	-0.019	-0.0002242
															13.4985	-0.0064475	-7.60805e-05
															13.5541	-0.0186	-0.00021948
															13.6096	-0.0122	-0.00014396
															13.6652	-0.0161	-0.00018998
															13.7207	-0.018	-0.0002124
															13.7763	-0.0155	-0.0001829
															13.8318	-0.0176	-0.00020768
															13.8874	-0.024	-0.0002832
															13.943	-0.0091226	-0.000107647
															13.9985	-0.0163	-0.00019234
															14.0541	-0.0229	-0.00027022
															14.1096	-0.0272	-0.00032096
															14.1652	-0.026	-0.0003068
															14.2207	-0.0143	-0.00016874
															14.2763	-0.0202	-0.00023836
															14.3318	-0.019	-0.0002242
															14.3874	-0.0145	-0.0001711
															14.4429	-0.0244	-0.00028792
															14.4985	-0.0196	-0.00023128
															14.5541	-0.0205	-0.0002419
															14.6096	-0.0184	-0.00021712
															14.6652	-0.0227	-0.00026786
															14.7207	-0.0233	-0.00027494
															14.7763	-0.0186	-0.00021948
															14.8318	-0.0149	-0.00017582
															14.8874	-0.0256	-0.00030208
															14.9429	-0.0227	-0.00026786
															14.9985	-0.0244	-0.00028792
															15.0541	-0.0198	-0.00023364
															15.1096	-0.0205	-0.0002419
															15.1652	-0.0209	-0.00024662
															15.2207	-0.0268	-0.00031624
															15.2763	-0.0311	-0.00036698
															15.3318	-0.0301	-0.00035518
															15.3874	-0.0227	-0.00026786
															15.4429	-0.0279	-0.00032922
															15.4985	-0.0023131	-2.72946e-05
															15.5541	0.214	0.0025252
															15.6096	0.55	0.00649
															15.6652	0.8053	0.00950254
															15.7207	0.991	0.0116938
															15.7763	1.1259	0.0132856
															15.8318	1.2334	0.0145541
															15.8874	1.3306	0.0157011
															15.9429	1.4114	0.0166545
															15.9985	1.4647	0.0172835
															16.0541	1.5131	0.0178546
															16.1096	1.5353	0.0181165
															16.1652	1.5476	0.0182617
															16.2207	1.5553	0.0183525
															16.2763	1.5554	0.0183537
															16.3318	1.5607	0.0184163
															16.3874	1.5561	0.018362
															16.4429	1.5583	0.0183879
															16.4985	1.5558	0.0183584
															16.5541	1.5484	0.0182711
															16.6096	1.5438	0.0182168
															16.6652	1.5503	0.0182935
															16.7207	1.547	0.0182546
															16.7763	1.5544	0.0183419
															16.8318	1.5531	0.0183266
															16.8874	1.5588	0.0183938
															16.9429	1.5577	0.0183809
															16.9985	1.5607	0.0184163
															17.0541	1.5651	0.0184682
															17.1096	1.5652	0.0184694
															17.1652	1.5725	0.0185555
															17.2207	1.5679	0.0185012
															17.2763	1.5769	0.0186074
															17.3318	1.5813	0.0186593
															17.3874	1.5874	0.0187313
															17.4429	1.5805	0.0186499
															17.4985	1.5863	0.0187183
															17.5541	1.5874	0.0187313
															17.6096	1.5868	0.0187242
															17.6652	1.5929	0.0187962
															17.7207	1.5871	0.0187278
															17.7763	1.5909	0.0187726
															17.8318	1.5915	0.0187797
															17.8874	1.5954	0.0188257
															17.943	1.597	0.0188446
															17.9985	1.6028	0.018913
															18.0541	1.5995	0.0188741
															18.1096	1.5965	0.0188387
															18.1652	1.6017	0.0189001
															18.2207	1.6003	0.0188835
															18.2763	1.6034	0.0189201
															18.3318	1.6011	0.018893
															18.3874	1.6067	0.0189591
															18.4429	1.6064	0.0189555
															18.4985	1.6042	0.0189296
															18.5541	1.6086	0.0189815
															18.6096	1.6105	0.0190039
															18.6652	1.6075	0.0189685
															18.7207	1.6025	0.0189095
															18.7763	1.6097	0.0189945
															18.8318	1.6155	0.0190629
															18.8874	1.6078	0.018972
															18.9429	1.61	0.018998
															18.9985	1.6058	0.0189484
															19.0541	1.618	0.0190924
															19.1096	1.6119	0.0190204
															19.1652	1.6161	0.01907
															19.2207	1.6208	0.0191254
															19.2763	1.6213	0.0191313
															19.3318	1.6127	0.0190299
															19.3874	1.6144	0.0190499
															19.4429	1.6122	0.019024
															19.4985	1.6208	0.0191254
															19.5541	1.6235	0.0191573
															19.6096	1.6185	0.0190983
															19.6652	1.6199	0.0191148
															19.7207	1.6219	0.0191384
															19.7763	1.6249	0.0191738
															19.8318	1.6216	0.0191349
															19.8874	1.6263	0.0191903
															19.9429	1.6183	0.0190959
															19.9985	1.6264	0.0191915
															20.0541	1.6272	0.019201
															20.1096	1.6225	0.0191455
															20.1652	1.6291	0.0192234
															20.2207	1.6363	0.0193083
															20.2763	1.6311	0.019247
															20.3318	1.6308	0.0192434
															20.3874	1.623	0.0191514
															20.4429	1.6327	0.0192659
															20.4985	1.6352	0.0192954
															20.5541	1.6324	0.0192623
															20.6096	1.6377	0.0193249
															20.6652	1.6252	0.0191774
															20.7207	1.6597	0.0195845
															20.7763	1.6466	0.0194299
															20.8318	1.6341	0.0192824
															20.8874	1.6397	0.0193485
															20.9429	1.6363	0.0193083
															20.9985	1.6405	0.0193579
															21.0541	1.6397	0.0193485
															21.1096	1.6444	0.0194039
															21.1652	1.6435	0.0193933
															21.2207	1.6444	0.0194039
															21.2763	1.6447	0.0194075
															21.3318	1.6472	0.019437
															21.3874	1.6544	0.0195219
															21.4429	1.6502	0.0194724
															21.4985	1.6477	0.0194429
															21.5541	1.6572	0.019555
															21.6096	1.6653	0.0196505
															21.6652	1.6569	0.0195514
															21.7207	1.6475	0.0194405
															21.7763	1.6505	0.0194759
															21.8318	1.658	0.0195644
															21.8874	1.6566	0.0195479
															21.9429	1.6552	0.0195314
															21.9985	1.6527	0.0195019
															22.0541	1.6627	0.0196199
															22.1096	1.6569	0.0195514
															22.1652	1.6672	0.019673
															22.2207	1.6619	0.0196104
															22.2763	1.6625	0.0196175
															22.3318	1.6734	0.0197461
															22.3874	1.6683	0.0196859
															22.443	1.6753	0.0197685
															22.4985	1.677	0.0197886
															22.5541	1.6834	0.0198641
															22.6096	1.6784	0.0198051
															22.6652	1.677	0.0197886
															22.7207	1.6781	0.0198016
															22.7763	1.6854	0.0198877
															22.8318	1.6912	0.0199562
															22.8874	1.6882	0.0199208
															22.9429	1.6856	0.0198901
															22.9985	1.6831	0.0198606
															23.0541	1.6896	0.0199373
															23.1096	1.6862	0.0198972
															23.1652	1.7044	0.0201119
															23.2207	1.6968	0.0200222
															23.2763	1.4387	0.0169767
															23.3318	0.174	0.0020532
															23.3874	1.6161	0.01907
															23.4429	1.7306	0.0204211
															23.4985	1.732	0.0204376
															23.5541	1.7224	0.0203243
															23.6096	1.7241	0.0203444
															23.6652	1.7207	0.0203043
															23.7207	1.7179	0.0202712
															23.7763	1.7187	0.0202807
															23.8318	1.7204	0.0203007
															23.8874	1.7179	0.0202712
															23.9429	1.7475	0.0206205
															23.9985	1.7331	0.0204506
															24.0541	1.7201	0.0202972
															24.1096	1.7162	0.0202512
															24.1652	1.7348	0.0204706
															24.2207	1.7244	0.0203479
															24.2763	1.717	0.0202606
															24.3318	1.7193	0.0202877
															24.3874	1.7196	0.0202913
															24.443	1.7486	0.0206335
															24.4985	1.7255	0.0203609
															24.5541	1.7227	0.0203279
															24.6096	1.719	0.0202842
															24.6652	1.7204	0.0203007
															24.7207	1.7246	0.0203503
															24.7763	1.7204	0.0203007
															24.8318	1.7396	0.0205273
															24.8874	1.73	0.020414
															24.943	1.7207	0.0203043
															24.9985	1.7407	0.0205403
															25.0541	1.7266	0.0203739
															25.1096	1.7263	0.0203703
															25.1652	1.728	0.0203904
															25.2207	1.7314	0.0204305
															25.2763	1.7232	0.0203338
															25.3318	1.7218	0.0203172
															25.3874	1.7252	0.0203574
															25.4429	1.7246	0.0203503
															25.4985	1.7447	0.0205875
															25.5541	1.7407	0.0205403
															25.6096	1.7292	0.0204046
															25.6652	1.7435	0.0205733
															25.7207	1.7325	0.0204435
															25.7763	1.7255	0.0203609
															25.8318	1.7249	0.0203538
															25.8874	1.7269	0.0203774
															25.9429	1.7263	0.0203703
															25.9985	1.7246	0.0203503
															26.0541	1.728	0.0203904
															26.1096	1.7563	0.0207243
															26.1652	1.7376	0.0205037
															26.2207	1.7447	0.0205875
															26.2763	1.7356	0.0204801
															26.3318	1.7365	0.0204907
															26.3874	1.7272	0.020381
															26.4429	1.7654	0.0208317
															26.4985	1.7688	0.0208718
															26.5541	1.7594	0.0207609
															26.6096	1.745	0.020591
															26.6652	1.7326	0.0204447
															26.7207	1.7297	0.0204105
															26.7763	1.7371	0.0204978
															26.8318	1.7371	0.0204978
															26.8874	1.7354	0.0204777
															26.9429	1.7535	0.0206913
															26.9985	1.741	0.0205438
															27.0541	1.7436	0.0205745
															27.1096	1.7385	0.0205143
															27.1652	1.7405	0.0205379
															27.2207	1.741	0.0205438
															27.2763	1.7396	0.0205273
															27.3318	1.7371	0.0204978
															27.3874	1.7331	0.0204506
															27.443	1.7343	0.0204647
															27.4985	1.7385	0.0205143
															27.5541	1.73	0.020414
															27.6096	1.7362	0.0204872
															27.6652	1.7328	0.020447
															27.7207	1.7481	0.0206276
															27.7763	1.7374	0.0205013
															27.8318	1.7309	0.0204246
															27.8874	1.7371	0.0204978
															27.9429	1.7745	0.0209391
															27.9985	1.7813	0.0210193
															28.0541	1.7742	0.0209356
															28.1096	1.7592	0.0207586
															28.1652	1.7439	0.020578
															28.2207	1.7447	0.0205875
															28.2763	1.7382	0.0205108
															28.3318	1.7668	0.0208482
															28.3874	1.7708	0.0208954
															28.443	1.7524	0.0206783
															28.4985	1.7413	0.0205473
															28.5541	1.7521	0.0206748
															28.6096	1.7733	0.0209249
															28.6652	1.7725	0.0209155
															28.7207	1.7603	0.0207715
															28.7763	1.7439	0.020578
															28.8318	1.7422	0.020558
															28.8874	1.7456	0.0205981
															28.9429	1.7439	0.020578
															28.9985	1.7334	0.0204541
															29.0541	1.7393	0.0205237
															29.1096	1.7481	0.0206276
															29.1652	1.7405	0.0205379
															29.2207	1.7402	0.0205344
															29.2763	1.7396	0.0205273
															29.3318	1.745	0.020591
															29.3874	1.7524	0.0206783
															29.4429	1.7586	0.0207515
															29.4985	1.7543	0.0207007
															29.5541	1.2158	0.0143464
															29.6096	1.0666	0.0125859
															29.6652	1.7036	0.0201025
															29.7207	1.7617	0.0207881
															29.7763	1.7748	0.0209426
															29.8318	1.785	0.021063
															29.8874	1.8001	0.0212412
															29.9429	1.797	0.0212046
															29.9985	1.7901	0.0211232
															30.0541	1.7842	0.0210536
															30.1096	1.7842	0.0210536
															30.1652	1.787	0.0210866
															30.2207	1.7691	0.0208754
															30.2763	1.7594	0.0207609
															30.3318	1.7583	0.0207479
															30.3874	1.7543	0.0207007
															30.443	1.7535	0.0206913
															30.4985	1.7507	0.0206583
															30.5541	1.7501	0.0206512
															30.6096	1.7461	0.020604
															30.6652	1.7464	0.0206075
															30.7207	1.743	0.0205674
															30.7763	1.7642	0.0208176
															30.8318	1.7549	0.0207078
															30.8874	1.7444	0.0205839
															30.943	1.7475	0.0206205
															30.9985	1.7452	0.0205934
															31.0541	1.7438	0.0205768
															31.1096	1.7404	0.0205367
															31.1652	1.7489	0.020637
															31.2207	1.7501	0.0206512
															31.2763	1.7472	0.020617
															31.3318	1.7444	0.0205839
															31.3874	1.7515	0.0206677
															31.4429	1.7435	0.0205733
															31.4985	1.7509	0.0206606
															31.5541	1.7413	0.0205473
															31.6096	1.7461	0.020604
															31.6652	1.7438	0.0205768
															31.7207	1.7393	0.0205237
															31.7763	1.7532	0.0206878
															31.8318	1.7402	0.0205344
															31.8874	1.7481	0.0206276
															31.943	1.743	0.0205674
															31.9985	1.7413	0.0205473
															32.0541	1.732	0.0204376
															32.1096	1.7348	0.0204706
															32.1652	1.7368	0.0204942
															32.2207	1.7356	0.0204801
															32.2763	1.7373	0.0205001
															32.3318	1.7311	0.020427
															32.3874	1.7294	0.0204069
															32.4429	1.7303	0.0204175
															32.4985	1.7308	0.0204234
															32.5541	1.7339	0.02046
															32.6096	1.73	0.020414
															32.6652	1.73	0.020414
															32.7207	1.726	0.0203668
															32.7763	1.7266	0.0203739
															32.8318	1.7283	0.0203939
															32.8874	1.7241	0.0203444
															32.943	1.7258	0.0203644
															32.9985	1.7193	0.0202877
															33.0541	1.7156	0.0202441
															33.1096	1.7227	0.0203279
															33.1652	1.717	0.0202606
															33.2207	1.7179	0.0202712
															33.2763	1.7198	0.0202936
															33.3318	1.7137	0.0202217
															33.3874	1.719	0.0202842
															33.4429	1.7125	0.0202075
															33.4985	1.7148	0.0202346
															33.5541	1.712	0.0202016
															33.6096	1.7128	0.020211
															33.6652	1.7123	0.0202051
															33.7207	1.7064	0.0201355
															33.7763	1.7078	0.020152
															33.8318	1.7055	0.0201249
															33.8874	1.7094	0.0201709
															33.9429	1.7047	0.0201155
															33.9985	1.6988	0.0200458
															34.0541	1.7013	0.0200753
															34.1096	1.6971	0.0200258
															34.1652	1.698	0.0200364
															34.2207	1.7002	0.0200624
															34.2763	1.6924	0.0199703
															34.3318	1.6924	0.0199703
															34.3874	1.6943	0.0199927
															34.443	1.6915	0.0199597
															34.4985	1.6901	0.0199432
															34.5541	1.6884	0.0199231
															34.6096	1.6921	0.0199668
															34.6652	1.6907	0.0199503
															34.7207	1.684	0.0198712
															34.7763	1.6876	0.0199137
															34.8318	1.6789	0.019811
															34.8874	1.6856	0.0198901
															34.943	1.6742	0.0197556
															34.9985	1.6781	0.0198016
															35.0541	1.6762	0.0197792
															35.1096	1.6759	0.0197756
															35.1652	1.6653	0.0196505
															35.2207	1.665	0.019647
															35.2763	1.6734	0.0197461
															35.3318	1.67	0.019706
															35.3874	1.6698	0.0197036
															35.4429	1.6648	0.0196446
															35.4985	1.6636	0.0196305
															35.5541	1.6556	0.0195361
															35.6096	1.6572	0.019555
															35.6652	1.6586	0.0195715
															35.7207	1.6578	0.019562
															35.7763	1.6506	0.0194771
															35.8318	1.6489	0.019457
															35.8874	1.6478	0.019444
															35.9429	1.6534	0.0195101
															35.9985	1.6448	0.0194086
															36.0541	1.6498	0.0194676
															36.1096	1.6459	0.0194216
															36.1652	1.6464	0.0194275
															36.2207	1.6473	0.0194381
															36.2763	1.6373	0.0193201
															36.3318	1.6423	0.0193791
															36.3874	1.6342	0.0192836
															36.4429	1.6384	0.0193331
															36.4985	1.6284	0.0192151
															36.5541	1.6276	0.0192057
															36.6096	1.6257	0.0191833
															36.6652	1.6218	0.0191372
															36.7207	1.6248	0.0191726
															36.7763	1.6179	0.0190912
															36.8318	1.6201	0.0191172
															36.8874	1.6119	0.0190204
															36.9429	1.6136	0.0190405
															36.9985	1.6106	0.0190051
															37.0541	1.605	0.018939
															37.1096	1.6111	0.019011
															37.1652	1.6042	0.0189296
															37.2207	1.6059	0.0189496
															37.2763	1.5971	0.0188458
															37.3318	1.5979	0.0188552
															37.3874	1.5946	0.0188163
															37.443	1.5952	0.0188234
															37.4985	1.5902	0.0187644
															37.5541	1.5924	0.0187903
															37.6096	1.582	0.0186676
															37.6652	1.5875	0.0187325
															37.7207	1.5831	0.0186806
															37.7763	1.5773	0.0186121
															37.8318	1.5828	0.018677
															37.8874	1.5792	0.0186346
															37.943	1.5779	0.0186192
															37.9985	1.5691	0.0185154
															38.0541	1.5743	0.0185767
															38.1096	1.5691	0.0185154
															38.1652	1.5694	0.0185189
															38.2207	1.5672	0.018493
															38.2763	1.5615	0.0184257
															38.3318	1.5617	0.0184281
															38.3874	1.5549	0.0183478
															38.443	1.5533	0.0183289
															38.4985	1.5503	0.0182935
															38.5541	1.5489	0.018277
															38.6096	1.5497	0.0182865
															38.6652	1.5484	0.0182711
															38.7207	1.541	0.0181838
															38.7763	1.5438	0.0182168
															38.8318	1.5421	0.0181968
															38.8874	1.5386	0.0181555
															38.943	1.5296	0.0180493
															38.9985	1.5296	0.0180493
															39.0541	1.5296	0.0180493
															39.1096	1.5223	0.0179631
															39.1652	1.5277	0.0180269
															39.2207	1.5201	0.0179372
															39.2763	1.518	0.0179124
															39.3318	1.5201	0.0179372
															39.3874	1.5123	0.0178451
															39.4429	1.5052	0.0177614
															39.4985	1.5017	0.0177201
															39.5541	1.5036	0.0177425
															39.6096	1.4982	0.0176788
															39.6652	1.5001	0.0177012
															39.7207	1.4936	0.0176245
															39.7763	1.4899	0.0175808
															39.8318	1.492	0.0176056
															39.8874	1.4877	0.0175549
															39.9429	1.4877	0.0175549
															39.9985	1.4793	0.0174557
															40.0541	1.4823	0.0174911
															40.1096	1.4758	0.0174144
															40.1652	1.4691	0.0173354
															40.2207	1.467	0.0173106
															40.2763	1.4678	0.01732
															40.3318	1.463	0.0172634
															40.3874	1.4565	0.0171867
															40.4429	1.4557	0.0171773
															40.4985	1.4498	0.0171076
															40.5541	1.4549	0.0171678
															40.6096	1.4504	0.0171147
															40.6652	1.4429	0.0170262
															40.7207	1.4512	0.0171242
															40.7763	1.4557	0.0171773
															40.8318	1.4485	0.0170923
															40.8874	1.4565	0.0171867
															40.9429	1.4488	0.0170958
															40.9985	1.4394	0.0169849
															41.0541	1.4319	0.0168964
															41.1096	1.4223	0.0167831
															41.1652	1.4239	0.016802
															41.2207	1.425	0.016815
															41.2763	1.4207	0.0167643
															41.3318	1.4143	0.0166887
															41.3874	1.4114	0.0166545
															41.4429	1.4045	0.0165731
															41.4985	1.409	0.0166262
															41.5541	1.4034	0.0165601
															41.6096	1.3896	0.0163973
															41.6652	1.3992	0.0165106
															41.7207	1.3894	0.0163949
															41.7763	1.3801	0.0162852
															41.8318	1.378	0.0162604
															41.8874	1.3759	0.0162356
															41.943	1.379	0.0162722
															41.9985	1.3796	0.0162793
															42.0541	1.3666	0.0161259
															42.1096	1.3632	0.0160858
															42.1652	1.3629	0.0160822
															42.2207	1.3616	0.0160669
															42.2763	1.3519	0.0159524
															42.3318	1.3503	0.0159335
															42.3874	1.3458	0.0158804
															42.4429	1.3364	0.0157695
															42.4985	1.3387	0.0157967
															42.5541	1.3282	0.0156728
															42.6096	1.3264	0.0156515
															42.6652	1.3222	0.015602
															42.7207	1.3139	0.015504
															42.7763	1.3141	0.0155064
															42.8318	1.3125	0.0154875
															42.8874	1.3039	0.015386
															42.9429	1.3042	0.0153896
															42.9985	1.2977	0.0153129
															43.0541	1.3005	0.0153459
															43.1096	1.2899	0.0152208
															43.1652	1.2795	0.0150981
															43.2207	1.2748	0.0150426
															43.2763	1.2722	0.015012
															43.3318	1.2675	0.0149565
															43.3874	1.2592	0.0148586
															43.443	1.2639	0.014914
															43.4985	1.2639	0.014914
															43.5541	1.2461	0.014704
															43.6096	1.2412	0.0146462
															43.6652	1.2399	0.0146308
															43.7207	1.2337	0.0145577
															43.7763	1.227	0.0144786
															43.8318	1.2209	0.0144066
															43.8874	1.2324	0.0145423
															43.9429	1.2129	0.0143122
															43.9985	1.2144	0.0143299
															44.0541	1.2004	0.0141647
															44.1096	1.2057	0.0142273
															44.1652	1.1934	0.0140821
															44.2207	1.198	0.0141364
															44.2763	1.1871	0.0140078
															44.3318	1.1837	0.0139677
															44.3874	1.1848	0.0139806
															44.4429	1.1651	0.0137482
															44.4985	1.1641	0.0137364
															44.5541	1.1677	0.0137789
															44.6096	1.172	0.0138296
															44.6652	1.1522	0.013596
															44.7207	1.1362	0.0134072
															44.7763	1.1382	0.0134308
															44.8318	1.1294	0.0133269
															44.8874	1.12	0.013216
															44.9429	1.1165	0.0131747
															44.9985	1.1327	0.0133659
															45.0541	1.1168	0.0131782
															45.1096	1.1054	0.0130437
															45.1652	1.0941	0.0129104
															45.2207	1.0871	0.0128278
															45.2763	1.0911	0.012875
															45.3318	1.0768	0.0127062
															45.3874	1.0748	0.0126826
															45.4429	1.0638	0.0125528
															45.4985	1.0741	0.0126744
															45.5541	1.0638	0.0125528
															45.6096	1.0483	0.0123699
															45.6652	1.0421	0.0122968
															45.7207	1.0541	0.0124384
															45.7763	1.0292	0.0121446
															45.8318	1.0237	0.0120797
															45.8874	1.0148	0.0119746
															45.943	1.0094	0.0119109
															45.9985	1.0024	0.0118283
															46.0541	1.0064	0.0118755
															46.1096	0.9899	0.0116808
															46.1652	0.9876	0.0116537
															46.2207	0.9808	0.0115734
															46.2763	0.9714	0.0114625
															46.3318	0.956	0.0112808
															46.3874	0.9707	0.0114543
															46.4429	0.945	0.011151
															46.4985	0.9567	0.0112891
															46.5541	0.9347	0.0110295
															46.6096	-0.0491	-0.00057938
															46.6652	0.822	0.0096996
															46.7207	1.4179	0.0167312
															46.7763	1.4137	0.0166817
															46.8318	1.3996	0.0165153
															46.8874	1.4105	0.0166439
															46.9429	1.3927	0.0164339
															46.9985	1.3848	0.0163406
															47.0541	1.3695	0.0161601
															47.1096	1.3555	0.0159949
															47.1652	1.3666	0.0161259
															47.2207	1.3474	0.0158993
															47.2763	1.3413	0.0158273
															47.3318	1.339	0.0158002
															47.3874	1.3183	0.0155559
															47.443	1.2985	0.0153223
															47.4985	1.2904	0.0152267
															47.5541	1.286	0.0151748
															47.6096	1.2743	0.0150367
															47.6652	1.2697	0.0149825
															47.7207	1.2653	0.0149305
															47.7763	1.2431	0.0146686
															47.8318	1.2415	0.0146497
															47.8874	1.2359	0.0145836
															47.943	1.2176	0.0143677
															47.9985	1.2156	0.0143441
															48.0541	1.1979	0.0141352
															48.1096	1.1816	0.0139429
															48.1652	1.1924	0.0140703
															48.2207	1.1756	0.0138721
															48.2763	1.5709	0.0185366
															48.3318	1.6247	0.0191715
															48.3874	1.6329	0.0192682
															48.443	1.6134	0.0190381
															48.4985	1.6057	0.0189473
															48.5541	1.5971	0.0188458
															48.6096	1.5818	0.0186652
															48.6652	1.576	0.0185968
															48.7207	1.5728	0.018559
															48.7763	1.5391	0.0181614
															48.8318	1.5322	0.01808
															48.8874	1.5129	0.0178522
															48.9429	1.5224	0.0179643
															48.9985	1.4997	0.0176965
															49.0541	1.4927	0.0176139
															49.1096	1.4897	0.0175785
															49.1652	1.4602	0.0172304
															49.2207	1.4516	0.0171289
															49.2763	1.446	0.0170628
															49.3318	1.4468	0.0170722
															49.3874	1.41	0.016638
															49.4429	1.3909	0.0164126
															49.4985	1.3574	0.0160173
															49.5541	1.3629	0.0160822
															49.6096	1.3653	0.0161105
															49.6652	1.3553	0.0159925
															49.7207	1.3011	0.015353
															49.7763	1.3243	0.0156267
															49.8318	1.3105	0.0154639
															49.8874	1.2714	0.0150025
															49.943	1.2616	0.0148869
															49.9985	1.2384	0.0146131
															50.0541	1.2464	0.0147075
															50.1096	1.2142	0.0143276
															50.1652	1.1975	0.0141305
															50.2207	1.2029	0.0141942
															50.2763	1.1845	0.0139771
															50.3318	1.157	0.0136526
															50.3874	1.1451	0.0135122
															50.4429	1.1102	0.0131004
															50.4985	1.1039	0.013026
															50.5541	1.0931	0.0128986
															50.6096	1.0705	0.0126319
															50.6652	1.0736	0.0126685
															50.7207	1.0262	0.0121092
															50.7763	1.0193	0.0120277
															50.8318	1.025	0.012095
															50.8874	0.9972	0.011767
															50.9429	0.9864	0.0116395
															50.9985	0.9638	0.0113728
															51.0541	1.7105	0.0201839
															51.1096	1.8739	0.022112
															51.1652	1.8587	0.0219327
															51.2207	1.88	0.022184
															51.2763	1.8026	0.0212707
															51.3318	1.8106	0.0213651
															51.3874	1.7827	0.0210359
															51.4429	1.7471	0.0206158
															51.4985	1.735	0.020473
															51.5541	1.7352	0.0204754
															51.6096	1.7232	0.0203338
															51.6652	1.6982	0.0200388
															51.7207	1.6681	0.0196836
															51.7763	1.6556	0.0195361
															51.8318	1.6315	0.0192517
															51.8874	1.6362	0.0193072
															51.9429	1.5855	0.0187089
															51.9985	1.5697	0.0185225
															52.0541	1.585	0.018703
															52.1096	1.5342	0.0181036
															52.1652	1.5231	0.0179726
															52.2207	1.474	0.0173932
															52.2763	1.4549	0.0171678
															52.3318	1.4769	0.0174274
															52.3874	1.4413	0.0170073
															52.443	1.3558	0.0159984
															52.4985	1.3788	0.0162698
															52.5541	1.3695	0.0161601
															52.6096	1.3204	0.0155807
															52.6652	1.3136	0.0155005
															52.7207	1.2701	0.0149872
															52.7763	1.2486	0.0147335
															52.8318	1.2313	0.0145293
															52.8874	1.2028	0.014193
															52.943	1.2507	0.0147583
															52.9985	0.6342	0.00748356
															53.0541	1.9391	0.0228814
															53.1096	1.8817	0.0222041
															53.1652	1.8363	0.0216683
															53.2207	1.8437	0.0217557
															53.2763	1.8523	0.0218571
															53.3318	1.7821	0.0210288
															53.3874	1.7595	0.0207621
															53.4429	1.7555	0.0207149
															53.4985	1.7265	0.0203727
															53.5541	1.6534	0.0195101
															53.6096	1.6767	0.0197851
															53.6652	1.6235	0.0191573
															53.7207	1.5667	0.0184871
															53.7763	1.5378	0.018146
															53.8318	1.5383	0.0181519
															53.8874	1.4493	0.0171017
															53.9429	1.3648	0.0161046
															53.9985	1.4767	0.0174251
															54.0541	1.364	0.0160952
															54.1096	1.3798	0.0162816
															54.1652	1.3152	0.0155194
															54.2207	1.2826	0.0151347
															54.2763	1.245	0.014691
															54.3318	1.2313	0.0145293
															54.3874	1.2018	0.0141812
															54.443	1.1795	0.0139181
															54.4985	1.1224	0.0132443
															54.5541	1.0434	0.0123121
															54.6096	1.0609	0.0125186
															54.6652	1.0419	0.0122944
															54.7207	0.9726	0.0114767
															54.7763	0.8903	0.0105055
															54.8318	0.9234	0.0108961
															54.8874	0.8423	0.00993914
															54.943	0.8188	0.00966184
															54.9985	0.8069	0.00952142
															55.0541	0.7376	0.00870368
															55.1096	0.6601	0.00778918
															55.1652	0.6764	0.00798152
															55.2207	0.6552	0.00773136
															55.2763	0.6129	0.00723222
															55.3318	0.6138	0.00724284
															55.3874	0.4969	0.00586342
															55.4429	0.4347	0.00512946
															55.4985	1.1401	0.0134532
															55.5541	1.5555	0.0183549
															55.6096	1.5207	0.0179443
															55.6652	1.4837	0.0175077
															55.7207	1.4114	0.0166545
															55.7763	1.338	0.0157884
															55.8318	1.3241	0.0156244
															55.8874	1.2974	0.0153093
															55.9429	1.2123	0.0143051
															55.9985	1.1985	0.0141423
															56.0541	1.2046	0.0142143
															56.1096	1.1437	0.0134957
															56.1652	1.0939	0.012908
															56.2207	0.9834	0.0116041
															56.2763	0.963	0.0113634
															56.3318	0.9032	0.0106578
															56.3874	0.8536	0.0100725
															56.443	0.8377	0.00988486
															56.4985	0.7534	0.00889012
															56.5541	0.7503	0.00885354
															56.6096	0.6351	0.00749418
															56.6652	0.6115	0.0072157
															56.7207	0.6009	0.00709062
															56.7763	0.5093	0.00600974
															56.8318	0.5558	0.00655844
															56.8874	0.3943	0.00465274
															56.9429	0.4296	0.00506928
															56.9985	0.3917	0.00462206
															57.0541	0.3212	0.00379016
															57.1096	0.8845	0.0104371
															57.1652	1.1163	0.0131723
															57.2207	1.443	0.0170274
															57.2763	1.4567	0.0171891
															57.3318	1.4262	0.0168292
															57.3874	1.3537	0.0159737
															57.443	1.3411	0.015825
															57.4985	1.2681	0.0149636
															57.5541	1.1735	0.0138473
															57.6096	1.0621	0.0125328
															57.6652	1.0317	0.0121741
															57.7207	0.8766	0.0103439
															57.7763	0.9239	0.010902
															57.8318	0.823	0.0097114
															57.8874	0.7129	0.00841222
															57.9429	0.7199	0.00849482
															57.9985	0.6848	0.00808064
															58.0541	0.6241	0.00736438
															58.1096	0.6125	0.0072275
															58.1652	1.8208	0.0214854
															58.2207	1.8824	0.0222123
															58.2763	1.7279	0.0203892
															58.3318	1.7869	0.0210854
															58.3874	1.6435	0.0193933
															58.443	1.6349	0.0192918
															58.4985	1.3743	0.0162167
															58.5541	1.4084	0.0166191
															58.6096	1.4529	0.0171442
															58.6652	1.14	0.013452
															58.7207	1.0034	0.0118401
															58.7763	1.1863	0.0139983
															58.8318	1.0853	0.0128065
															58.8874	0.9018	0.0106412
															58.9429	0.8396	0.00990728
															58.9985	0.7659	0.00903762
															59.0541	1.5261	0.018008
															59.1096	1.506	0.0177708
															59.1652	1.3959	0.0164716
															59.2207	1.3837	0.0163277
															59.2763	1.1257	0.0132833
															59.3318	1.1293	0.0133257
															59.3874	1.1612	0.0137022
															59.4429	0.9719	0.0114684
															59.4985	0.8753	0.0103285
															59.5541	0.8702	0.0102684
															59.6096	0.5998	0.00707764
															59.6652	-0.0214	-0.00025252
															59.7207	1.8685	0.0220483
															59.7763	1.4668	0.0173082
															59.8318	1.3951	0.0164622
															59.8874	1.3251	0.0156362
															59.9429	1.2436	0.0146745
															59.9985	1.0277	0.0121269
															60.0541	1.0302	0.0121564
															60.1096	0.8606	0.0101551
															60.1652	0.6977	0.00823286
															60.2207	0.6714	0.00792252
															60.2763	0.5307	0.00626226
															60.3318	0.4685	0.0055283
															60.3874	0.8136	0.00960048
															60.4429	1.0136	0.0119605
															60.4985	1.0745	0.0126791
															60.5541	0.8067	0.00951906
															60.6096	0.7484	0.00883112
															60.6652	0.5255	0.0062009
															60.7207	0.5506	0.00649708
															60.7763	0.4923	0.00580914
															60.8318	1.9046	0.0224743
															60.8874	1.933	0.0228094
															60.9429	1.7019	0.0200824
															60.9985	1.6435	0.0193933
															61.0541	1.3885	0.0163843
															61.1096	1.3711	0.016179
															61.1652	1.1946	0.0140963
															61.2207	1.0071	0.0118838
															61.2763	0.8186	0.00965948
															61.3318	0.62	0.007316
															61.3874	0.7293	0.00860574
															61.4429	0.4898	0.00577964
															61.4985	0.6382	0.00753076
															61.5541	0.3951	0.00466218
															61.6096	0.3194	0.00376892
															61.6652	0.3248	0.00383264
															61.7207	1.2328	0.014547
															61.7763	1.3697	0.0161625
															61.8318	1.3469	0.0158934
															61.8874	1.0558	0.0124584
															61.9429	0.8536	0.0100725
															61.9985	0.6401	0.00755318
															62.0541	0.4817	0.00568406
															62.1096	1.3353	0.0157565
															62.1652	1.8272	0.021561
															62.2207	1.6851	0.0198842
															62.2763	1.4243	0.0168067
															62.3318	1.1379	0.0134272
															62.3874	0.9484	0.0111911
															62.4429	0.9206	0.0108631
															62.4985	0.7054	0.00832372
															62.5541	0.6336	0.00747648
															62.6096	0.5352	0.00631536
															62.6652	0.5734	0.00676612
															62.7207	1.4823	0.0174911
															62.7763	1.3922	0.016428
															62.8318	0.9281	0.0109516
															62.8874	0.8366	0.00987188
															62.943	0.7746	0.00914028
															62.9985	0.7049	0.00831782
															63.0541	0.4912	0.00579616
															63.1096	-0.0072233	-8.52349e-05
															63.1652	0.0551	0.00065018
															63.2207	0.0634	0.00074812
															63.2763	0.1594	0.00188092
															63.3318	0.2093	0.00246974
															63.3874	0.2051	0.00242018
															63.443	0.2822	0.00332996
															63.4985	0.2887	0.00340666
															63.5541	0.2029	0.00239422
															63.6096	0.5049	0.00595782
															63.6652	0.3854	0.00454772
															63.7207	0.4993	0.00589174
															63.7763	0.7371	0.00869778
															63.8318	1.1785	0.0139063
															63.8874	1.1235	0.0132573
															63.943	1.477	0.0174286
															63.9985	1.9156	0.0226041
															64.0541	1.4794	0.0174569
															64.1096	0.8275	0.0097645
															64.1652	0.4642	0.00547756
															64.2207	0.9298	0.0109716
															64.2763	0.9832	0.0116018
															64.3318	1.1043	0.0130307
															64.3874	1.0772	0.012711
															64.443	1.078	0.0127204
															64.4985	0.8726	0.0102967
															64.5541	0.9616	0.0113469
															64.6096	0.9518	0.0112312
															64.6652	0.8903	0.0105055
															64.7207	0.8963	0.0105763
															64.7763	0.8712	0.0102802
															64.8318	0.8282	0.00977276
															64.8874	0.9469	0.0111734
															64.9429	0.8426	0.00994268
															64.9985	0.7524	0.00887832
															65.0541	0.9067	0.0106991
															65.1096	0.8476	0.0100017
															65.1652	0.8342	0.00984356
															65.2207	0.8332	0.00983176
															65.2763	0.8447	0.00996746
															65.3318	0.7143	0.00842874
															65.3874	0.6516	0.00768888
															65.4429	0.8062	0.00951316
															65.4985	0.6523	0.00769714
															65.5541	0.7463	0.00880634
															65.6096	0.7171	0.00846178
															65.6652	0.7863	0.00927834
															65.7207	0.7192	0.00848656
															65.7763	0.6972	0.00822696
															65.8318	0.8217	0.00969606
															65.8874	0.8457	0.00997926
															65.9429	0.7813	0.00921934
															65.9985	0.7972	0.00940696
															66.0541	0.8284	0.00977512
															66.1096	0.7569	0.00893142
															66.1652	0.8179	0.00965122
															66.2207	0.8683	0.0102459
															66.2763	0.915	0.010797
															66.3318	1.0421	0.0122968
															66.3874	1.02	0.012036
															66.443	1.0702	0.0126284
															66.4985	0.9788	0.0115498
															66.5541	1.0986	0.0129635
															66.6096	1.0823	0.0127711
															66.6652	1.056	0.0124608
															66.7207	1.0207	0.0120443
															66.7763	1.0762	0.0126992
															66.8318	1.1003	0.0129835
															66.8874	1.3335	0.0157353
															66.9429	1.081	0.0127558
															66.9985	1.0973	0.0129481
															67.0541	1.3131	0.0154946
															67.1096	1.1434	0.0134921
															67.1652	1.3047	0.0153955
															67.2207	1.286	0.0151748
															67.2763	1.3259	0.0156456
															67.3318	0.6509	0.00768062
															67.3874	0.6667	0.00786706
															67.4429	0.5372	0.00633896
															67.4985	0.5266	0.00621388
															67.5541	0.5625	0.0066375
															67.6096	0.6642	0.00783756
															67.6652	0.5819	0.00686642
															67.7207	0.7178	0.00847004
															67.7763	0.7768	0.00916624
															67.8318	0.6408	0.00756144
															67.8874	0.7425	0.0087615
															67.943	0.6842	0.00807356
															67.9985	0.7929	0.00935622
															68.0541	0.7383	0.00871194
															68.1096	0.7813	0.00921934
															68.1652	0.838	0.0098884
															68.2207	0.8438	0.00995684
															68.2763	0.7291	0.00860338
															68.3318	0.8445	0.0099651
															68.3874	0.8666	0.0102259
															68.443	0.9206	0.0108631
															68.4985	0.9577	0.0113009
															68.5541	0.9479	0.0111852
															68.6096	0.8736	0.0103085
															68.6652	0.9808	0.0115734
															68.7207	0.9545	0.0112631
															68.7763	0.9379	0.0110672
															68.8318	1.0131	0.0119546
															68.8874	1.0466	0.0123499
															68.943	1.0056	0.0118661
															68.9985	0.9761	0.011518
															69.0541	0.9992	0.0117906
															69.1096	1.0022	0.011826
															69.1652	1.0148	0.0119746
															69.2207	1.0403	0.0122755
															69.2782	1.0349	0.0122118
															69.3318	-0.0291	-0.00034338
															69.3874	0.4461	0.00526398
															69.443	0.4181	0.00493358
															69.4985	0.4707	0.00555426
															69.5541	0.4374	0.00516132
															69.6096	0.4739	0.00559202
															69.6652	0.481	0.0056758
															69.7207	0.5207	0.00614426
															69.7763	0.4763	0.00562034
															69.8318	0.5223	0.00616314
															69.8874	0.6011	0.00709298
															69.943	0.6438	0.00759684
															69.9985	0.5463	0.00644634
															70.0541	0.7361	0.00868598
															70.1096	0.7251	0.00855618
															70.1652	0.5746	0.00678028
															70.2207	0.6389	0.00753902
															70.2763	0.6711	0.00791898
															70.3318	0.7324	0.00864232
															70.3874	0.7028	0.00829304
															70.4429	0.5495	0.0064841
															70.4985	0.6937	0.00818566
															70.5541	0.6996	0.00825528
															70.6096	0.6914	0.00815852
															70.6652	0.6382	0.00753076
															70.7207	0.6442	0.00760156
															70.7763	0.581	0.0068558
															70.8318	0.6735	0.0079473
															70.8874	0.7136	0.00842048
															70.9429	0.5155	0.0060829
															70.9985	0.6642	0.00783756
															71.0541	0.5954	0.00702572
															71.1096	0.7583	0.00894794
															71.1652	0.6145	0.0072511
															71.2207	0.6251	0.00737618
															71.2763	0.6228	0.00734904
															71.3318	0.6874	0.00811132
															71.3874	0.6632	0.00782576
															71.4429	0.6163	0.00727234
															71.4985	0.657	0.0077526
															71.5541	0.6096	0.00719328
															71.6096	0.683	0.0080594
															71.6652	0.7143	0.00842874
															71.7207	0.6398	0.00754964
															71.7763	0.6002	0.00708236
															71.8318	0.6103	0.00720154
															71.8874	0.6124	0.00722632
															71.9429	0.6614	0.00780452
															71.9985	0.5712	0.00674016
															72.0541	0.6014	0.00709652
															72.1096	0.6067	0.00715906
															72.1652	0.6479	0.00764522
															72.2207	0.6447	0.00760746
															72.2763	0.5171	0.00610178
															72.3318	0.5502	0.00649236
															72.3874	0.5848	0.00690064
															72.4429	0.4941	0.00583038
															72.4985	0.5717	0.00674606
															72.5541	0.6087	0.00718266
															72.6096	0.5845	0.0068971
															72.6652	0.4602	0.00543036
															72.7207	0.4703	0.00554954
															72.7763	0.451	0.0053218
															72.8318	0.4379	0.00516722
															72.8874	0.5156	0.00608408
															72.9429	0.369	0.0043542
															72.9985	0.4319	0.00509642
															73.0541	0.4348	0.00513064
															73.1096	0.4314	0.00509052
															73.1652	0.4851	0.00572418
															73.2207	0.4406	0.00519908
															73.2763	0.3455	0.0040769
															73.3318	0.3957	0.00466926
															73.3874	0.3875	0.0045725
															73.443	0.338	0.0039884
															73.4985	0.3882	0.00458076
															73.5541	0.4937	0.00582566
															73.6096	0.4158	0.00490644
															73.6652	0.4279	0.00504922
															73.7207	0.4005	0.0047259
															73.7763	0.4953	0.00584454
															73.8318	0.3586	0.00423148
															73.8874	0.4466	0.00526988
															73.943	0.443	0.0052274
															73.9985	0.3659	0.00431762
															74.0541	0.4591	0.00541738
															74.1096	0.3919	0.00462442
															74.1652	0.4043	0.00477074
															74.2207	0.3306	0.00390108
															74.2763	0.443	0.0052274
															74.3318	0.419	0.0049442
															74.3874	0.4265	0.0050327
															74.4429	0.4595	0.0054221
															74.4985	0.4087	0.00482266
															74.5541	0.4285	0.0050563
															74.6096	0.507	0.0059826
															74.6652	0.435	0.005133
															74.7207	0.4258	0.00502444
															74.7763	0.3754	0.00442972
															74.8318	0.4267	0.00503506
															74.8874	0.4101	0.00483918
															74.943	0.3408	0.00402144
															74.9985	0.3425	0.0040415
															75.0541	0.3709	0.00437662
															75.1096	0.3399	0.00401082
															75.1652	0.3458	0.00408044
															75.2207	0.4147	0.00489346
															75.2763	0.4094	0.00483092
															75.3318	0.4437	0.00523566
															75.3874	0.3828	0.00451704
															75.443	-0.0107	-0.00012626
															75.4985	0.5267	0.00621506
															75.5541	0.3071	0.00362378
															75.6096	0.3493	0.00412174
															75.6652	0.3375	0.0039825
															75.7207	0.3217	0.00379606
															75.7763	0.2614	0.00308452
															75.8318	0.2774	0.00327332
															75.8874	0.3985	0.0047023
															75.9429	0.3259	0.00384562
															75.9985	0.3557	0.00419726
															76.0541	0.315	0.003717
															76.1096	0.3134	0.00369812
															76.1652	0.3775	0.0044545
															76.2207	0.3235	0.0038173
															76.2763	0.3386	0.00399548
															76.3318	0.352	0.0041536
															76.3874	0.3181	0.00375358
															76.443	0.3229	0.00381022
															76.4985	0.3387	0.00399666
															76.5541	0.3682	0.00434476
															76.6096	0.4403	0.00519554
															76.6652	0.3549	0.00418782
															76.7207	0.28	0.003304
															76.7763	0.2776	0.00327568
															76.8318	0.3199	0.00377482
															76.8874	0.3761	0.00443798
															76.943	0.2614	0.00308452
															76.9985	0.4265	0.0050327
															77.0541	0.3497	0.00412646
															77.1096	0.3418	0.00403324
															77.1652	0.2954	0.00348572
															77.2207	0.3229	0.00381022
															77.2763	0.2731	0.00322258
															77.3318	0.2822	0.00332996
															77.3874	0.2662	0.00314116
															77.4429	0.3039	0.00358602
															77.4985	0.3411	0.00402498
															77.5541	0.2755	0.0032509
															77.6096	0.2303	0.00271754
															77.6652	0.3075	0.0036285
															77.7207	0.282	0.0033276
															77.7763	0.3202	0.00377836
															77.8318	0.2524	0.00297832
															77.8874	0.3027	0.00357186
															77.9429	0.2814	0.00332052
															77.9985	0.3456	0.00407808
															78.0541	0.3182	0.00375476
															78.1096	0.316	0.0037288
															78.1652	0.3386	0.00399548
															78.2207	0.2401	0.00283318
															78.2763	0.2807	0.00331226
															78.3318	0.3071	0.00362378
															78.3874	0.2586	0.00305148
															78.4429	0.3278	0.00386804
															78.4985	0.234	0.0027612
															78.5541	0.3278	0.00386804
															78.6096	0.3285	0.0038763
															78.6652	0.3749	0.00442382
															78.7207	0.2992	0.00353056
															78.7763	0.2816	0.00332288
															78.8318	0.3117	0.00367806
															78.8874	0.3178	0.00375004
															78.9429	0.3807	0.00449226
															78.9985	0.3811	0.00449698
															79.0541	0.272	0.0032096
															79.1096	0.2608	0.00307744
															79.1652	0.2593	0.00305974
															79.2207	0.3088	0.00364384
															79.2763	0.2796	0.00329928
															79.3318	0.3117	0.00367806
															79.3874	0.3542	0.00417956
															79.443	0.2734	0.00322612
															79.4985	0.309	0.0036462
															79.5541	0.2619	0.00309042
															79.6096	0.3307	0.00390226
															79.6652	0.336	0.0039648
															79.7207	0.2903	0.00342554
															79.7763	0.2881	0.00339958
															79.8318	0.1911	0.00225498
															79.8874	0.3349	0.00395182
															79.943	0.2738	0.00323084
															79.9985	0.2511	0.00296298
															80.0541	0.2493	0.00294174
															80.1096	0.2936	0.00346448
															80.1652	0.3243	0.00382674
															80.2207	0.2645	0.0031211
															80.2763	0.2979	0.00351522
															80.3318	0.3136	0.00370048
															80.3874	0.3136	0.00370048
															80.4429	0.2349	0.00277182
															80.4985	0.2403	0.00283554
															80.5541	0.3683	0.00434594
															80.6096	0.3097	0.00365446
															80.6652	0.199	0.0023482
															80.7207	0.3937	0.00464566
															80.7763	0.3533	0.00416894
															80.8318	0.2766	0.00326388
															80.8874	0.3213	0.00379134
															80.943	0.2515	0.0029677
															80.9985	0.3568	0.00421024
															81.0541	0.3114	0.00367452
															81.1096	0.2623	0.00309514
															81.1652	0.2638	0.00311284
															81.2207	0.3077	0.00363086
															81.2763	0.2671	0.00315178
															81.3318	0.3694	0.00435892
															81.3874	0.3093	0.00364974
															81.4429	0.3106	0.00366508
															81.4985	0.2773	0.00327214
															81.5541	0.2472	0.00291696
															81.6096	0.3712	0.00438016
															81.6652	0.2524	0.00297832
															81.7207	0.3191	0.00376538
															81.7763	0.234	0.0027612
															81.8318	0.3274	0.00386332
															81.8874	0.2474	0.00291932
															81.943	0.2844	0.00335592
															81.9985	0.3833	0.00452294
															82.0541	0.3143	0.00370874
															82.1096	0.3195	0.0037701
															82.1652	0.3101	0.00365918
															82.2207	0.3259	0.00384562
															82.2763	0.2645	0.0031211
															82.3318	0.3626	0.00427868
															82.3874	0.3176	0.00374768
															82.4429	0.3012	0.00355416
															82.4985	0.2263	0.00267034
															82.5541	0.2999	0.00353882
															82.6096	0.3785	0.0044663
															82.6652	0.3278	0.00386804
															82.7207	0.2686	0.00316948
															82.7763	0.2729	0.00322022
															82.8318	0.3694	0.00435892
															82.8874	0.3606	0.00425508
															82.9429	0.276	0.0032568
															82.9985	0.2777	0.00327686
															83.0541	0.3077	0.00363086
															83.1096	0.0063535	7.49713e-05
															83.1652	0.1368	0.00161424
															83.2207	0.256	0.0030208
															83.2763	0.275	0.003245
															83.3318	0.2132	0.00251576
															83.3874	0.237	0.0027966
															83.4429	0.2623	0.00309514
															83.4985	0.312	0.0036816
															83.5541	0.242	0.0028556
															83.6096	0.2909	0.00343262
															83.6652	0.2405	0.0028379
															83.7207	0.4082	0.00481676
															83.7763	0.364	0.0042952
															83.8318	0.267	0.0031506
															83.8874	0.3589	0.00423502
															83.9429	0.3256	0.00384208
															83.9985	0.3849	0.00454182
															84.0541	0.3567	0.00420906
															84.1096	0.4009	0.00473062
															84.1652	0.4193	0.00494774
															84.2207	0.4011	0.00473298
															84.2763	0.2454	0.00289572
															84.3318	0.3794	0.00447692
															84.3874	0.2759	0.00325562
															84.4429	0.4951	0.00584218
															84.4985	0.2757	0.00325326
															84.5541	0.2885	0.0034043
															84.6096	0.3083	0.00363794
															84.6652	0.277	0.0032686
															84.7207	0.2824	0.00333232
															84.7763	0.3083	0.00363794
															84.8318	0.3293	0.00388574
															84.8874	0.3429	0.00404622
															84.943	0.3708	0.00437544
															84.9985	0.3903	0.00460554
															85.0541	0.3258	0.00384444
															85.1096	0.3605	0.0042539
															85.1652	0.4238	0.00500084
															85.2207	0.3574	0.00421732
															85.2763	0.3005	0.0035459
															85.3318	0.373	0.0044014
															85.3874	0.418	0.0049324
															85.4429	0.3938	0.00464684
															85.4985	0.3715	0.0043837
															85.5541	0.3823	0.00451114
															85.6096	0.412	0.0048616
															85.6652	0.4091	0.00482738
															85.7207	0.4408	0.00520144
															85.7763	0.437	0.0051566
															85.8318	0.3291	0.00388338
															85.8874	0.317	0.0037406
															85.943	0.4399	0.00519082
															85.9985	0.3613	0.00426334
															86.0541	0.3076	0.00362968
															86.1096	0.3876	0.00457368
															86.1652	0.3898	0.00459964
															86.2207	0.4227	0.00498786
															86.2763	0.4587	0.00541266
															86.3318	0.5896	0.00695728
															86.3874	0.4307	0.00508226
															86.443	0.4432	0.00522976
															86.4985	0.4211	0.00496898
															86.5541	0.4629	0.00546222
															86.6096	0.424	0.0050032
															86.6652	0.5109	0.00602862
															86.7207	0.4314	0.00509052
															86.7763	0.5489	0.00647702
															86.8318	0.4715	0.0055637
															86.8874	0.594	0.0070092
															86.9429	0.6241	0.00736438
															86.9985	0.4551	0.00537018
															87.0541	0.4058	0.00478844
															87.1096	0.4762	0.00561916
															87.1652	0.5523	0.00651714
															87.2207	0.5155	0.0060829
															87.2763	0.5933	0.00700094
															87.3318	0.5749	0.00678382
															87.3874	0.6496	0.00766528
															87.4429	0.5699	0.00672482
															87.4985	0.5582	0.00658676
															87.5541	0.4038	0.00476484
															87.6096	0.5059	0.00596962
															87.6652	0.515	0.006077
															87.7207	0.487	0.0057466
															87.7763	0.602	0.0071036
															87.8318	0.5248	0.00619264
															87.8874	0.5664	0.00668352
															87.943	0.513	0.0060534
															87.9985	0.5578	0.00658204
															88.0541	0.5953	0.00702454
															88.1096	0.7061	0.00833198
															88.1652	0.6332	0.00747176
															88.2207	0.5254	0.00619972
															88.2763	0.4153	0.00490054
															88.3318	0.5143	0.00606874
															88.3874	0.5836	0.00688648
															88.4429	0.5272	0.00622096
															88.4985	0.5116	0.00603688
															88.5541	0.5632	0.00664576
															88.6096	0.5343	0.00630474
															88.6652	0.6179	0.00729122
															88.7207	0.571	0.0067378
															88.7763	0.5541	0.00653838
															88.8318	0.6124	0.00722632
															88.8874	0.6357	0.00750126
															88.9429	0.7023	0.00828714
															88.9985	0.6292	0.00742456
															89.0541	0.6673	0.00787414
															89.1096	0.6011	0.00709298
															89.1652	0.6306	0.00744108
															89.2207	0.7	0.00826
															89.2763	0.6848	0.00808064
															89.3318	0.7225	0.0085255
															89.3874	0.7054	0.00832372
															89.4429	0.7625	0.0089975
															89.4985	0.6902	0.00814436
															89.5541	0.767	0.0090506
															89.6096	0.6967	0.00822106
															89.6652	0.6586	0.00777148
															89.7207	0.6979	0.00823522
															89.7763	0.6965	0.0082187
															89.8318	0.7242	0.00854556
															89.8874	0.7789	0.00919102
															89.943	0.7925	0.0093515
															89.9985	0.8039	0.00948602
															90.0541	0.8698	0.0102636
															90.1096	0.9147	0.0107935
															90.1652	0.8994	0.0106129
															90.2207	0.8006	0.00944708
															90.2763	0.8173	0.00964414
															90.3318	0.8469	0.00999342
															90.3874	0.8442	0.00996156
															90.4429	0.7216	0.00851488
															90.4985	0.763	0.0090034
															90.5541	0.9467	0.0111711
															90.6096	0.8645	0.0102011
															90.6652	0.8109	0.00956862
															90.7207	0.7334	0.00865412
															90.7763	0.9113	0.0107533
															90.8318	0.9593	0.0113197
															90.8874	0.8819	0.0104064
															90.9429	0.905	0.010679
															90.9985	0.9694	0.0114389
															91.0541	0.8425	0.0099415
															91.1096	0.74	0.008732
															91.1652	0.9013	0.0106353
															91.2207	0.8708	0.0102754
															91.2763	0.9069	0.0107014
															91.3318	0.8667	0.0102271
															91.3874	0.863	0.0101834
															91.4429	1.0143	0.0119687
															91.4985	0.936	0.0110448
															91.5541	1.0732	0.0126638
															91.6096	0.9985	0.0117823
															91.6652	0.9903	0.0116855
															91.7207	1.0101	0.0119192
															91.7763	1.0557	0.0124573
															91.8318	1.03	0.012154
															91.8874	0.9438	0.0111368
															91.9429	0.9137	0.0107817
															91.9985	0.9657	0.0113953
															92.0541	1.0964	0.0129375
															92.1096	0.7421	0.00875678
															92.1652	0.8392	0.00990256
															92.2207	0.7848	0.00926064
															92.2763	0.7348	0.00867064
															92.3318	0.6974	0.00822932
															92.3874	0.7906	0.00932908
															92.4429	0.7872	0.00928896
															92.4985	0.8469	0.00999342
															92.5541	0.8377	0.00988486
															92.6096	0.814	0.0096052
															92.6652	0.8858	0.0104524
															92.7207	0.8481	0.0100076
															92.7763	0.8948	0.0105586
															92.8318	0.7937	0.00936566
															92.8874	0.8296	0.00978928
															92.943	0.8754	0.0103297
															92.9985	0.8758	0.0103344
															93.0541	0.9299	0.0109728
															93.1096	0.8991	0.0106094
															93.1652	0.9945	0.0117351
															93.2207	0.9745	0.0114991
															93.2763	0.895	0.010561
															93.3318	0.7386	0.00871548
															93.3874	0.865	0.010207
															93.4429	0.8428	0.00994504
															93.4985	0.9414	0.0111085
															93.5541	0.8416	0.00993088
															93.6096	0.9147	0.0107935
															93.6652	0.8708	0.0102754
															93.7207	0.9416	0.0111109
															93.7763	0.9301	0.0109752
															93.8318	1.029	0.0121422
															93.8874	0.8555	0.0100949
															93.9429	0.8698	0.0102636
															93.9985	0.8935	0.0105433
															94.0541	0.8051	0.00950018
															94.1096	0.8104	0.00956272
															94.1652	0.8909	0.0105126
															94.2207	-0.0266	-0.00031388
															94.2763	0.3568	0.00421024
															94.3318	0.5166	0.00609588
															94.3874	0.5576	0.00657968
															94.443	0.5874	0.00693132
															94.4985	0.7853	0.00926654
															94.5541	0.7242	0.00854556
															94.6096	0.5707	0.00673426
															94.6652	0.5991	0.00706938
															94.7207	0.7573	0.00893614
															94.7763	0.6373	0.00752014
															94.8318	0.7327	0.00864586
															94.8874	0.8433	0.00995094
															94.9429	0.7687	0.00907066
															94.9985	0.8623	0.0101751
															95.0541	0.865	0.010207
															95.1096	0.8356	0.00986008
															95.1652	0.7829	0.00923822
															95.2207	0.7784	0.00918512
															95.2763	0.8066	0.00951788
															95.3318	0.8703	0.0102695
															95.3874	0.7841	0.00925238
															95.4429	0.8224	0.00970432
															95.4985	0.9237	0.0108997
															95.5541	0.667	0.0078706
															95.6096	0.7299	0.00861282
															95.6652	0.6785	0.0080063
															95.7207	0.7551	0.00891018
															95.7763	0.6682	0.00788476
															95.8318	0.6403	0.00755554
															95.8874	0.6857	0.00809126
															95.9429	0.6736	0.00794848
															95.9985	0.6831	0.00806058
															96.0541	0.654	0.0077172
															96.1096	0.7148	0.00843464
															96.1652	0.6308	0.00744344
															96.2207	0.6605	0.0077939
															96.2763	0.6028	0.00711304
															96.3318	0.6542	0.00771956
															96.3874	0.6412	0.00756616
															96.4429	0.5897	0.00695846
															96.4985	0.6614	0.00780452
															96.5541	0.6918	0.00816324
															96.6096	0.6204	0.00732072
															96.6652	0.6338	0.00747884
															96.7207	0.7725	0.0091155
															96.7763	0.7063	0.00833434
															96.8318	0.6596	0.00778328
															96.8874	0.5948	0.00701864
															96.9429	0.6157	0.00726526
															96.9985	0.6097	0.00719446
															97.0541	0.6031	0.00711658
															97.1096	0.6993	0.00825174
															97.1652	0.5631	0.00664458
															97.2207	0.5531	0.00652658
															97.2763	0.5287	0.00623866
															97.3318	0.5383	0.00635194
															97.3874	0.5963	0.00703634
															97.443	0.6486	0.00765348
															97.4985	0.618	0.0072924
															97.5541	0.5747	0.00678146
															97.6096	0.5036	0.00594248
															97.6652	0.6161	0.00726998
															97.7207	0.5029	0.00593422
															97.7763	0.5855	0.0069089
															97.8318	0.6272	0.00740096
															97.8874	0.5367	0.00633306
															97.9429	0.539	0.0063602
															97.9985	0.4663	0.00550234
															98.0541	0.5338	0.00629884
															98.1096	0.5356	0.00632008
															98.1652	0.4564	0.00538552
															98.2207	0.5158	0.00608644
															98.2763	0.4954	0.00584572
															98.3318	0.5484	0.00647112
															98.3874	0.531	0.0062658
															98.4429	0.539	0.0063602
															98.4985	0.5566	0.00656788
															98.5541	0.4857	0.00573126
															98.6096	0.4875	0.0057525
															98.6652	0.4898	0.00577964
															98.7207	0.4722	0.00557196
															98.7763	0.485	0.005723
															98.8318	0.5281	0.00623158
															98.8874	0.4902	0.00578436
															98.943	5.5117	0.0650381
															98.9985	0.4342	0.00512356
															99.0541	0.5013	0.00591534
															99.1096	0.4526	0.00534068
															99.1652	0.4443	0.00524274
															99.2207	0.3134	0.00369812
															99.2763	0.3959	0.00467162
															99.3318	0.4148	0.00489464
															99.3874	0.3483	0.00410994
															99.443	0.3899	0.00460082
															99.4985	0.4864	0.00573952
															99.5541	0.4995	0.0058941
															99.6096	0.4117	0.00485806
															99.6652	0.3919	0.00462442
															99.7207	0.3314	0.00391052
															99.7763	0.4869	0.00574542
															99.8318	0.4365	0.0051507
															99.8874	0.3617	0.00426806
															99.943	0.4175	0.0049265
															99.9985	0.467	0.0055106
															100.054	0.4213	0.00497134
															100.11	0.3501	0.00413118
															100.165	0.3009	0.00355062
															100.221	0.4048	0.00477664
															100.276	0.4246	0.00501028
															100.332	0.5127	0.00604986
															100.387	0.403	0.0047554
															100.443	0.419	0.0049442
															100.499	0.413	0.0048734
															100.554	0.4298	0.00507164
															100.61	0.4598	0.00542564
															100.665	0.377	0.0044486
															100.721	0.3675	0.0043365
															100.776	0.393	0.0046374
															100.832	0.3814	0.00450052
															100.887	0.3454	0.00407572
															100.943	0.3646	0.00430228
															100.999	0.421	0.0049678
															101.054	0.409	0.0048262
															101.11	0.3783	0.00446394
															101.165	0.4576	0.00539968
															101.221	0.5099	0.00601682
															101.276	0.4085	0.0048203
															101.332	0.3487	0.00411466
															101.387	0.4374	0.00516132
															101.443	0.4148	0.00489464
															101.499	0.4266	0.00503388
															101.554	0.3912	0.00461616
															101.61	0.3573	0.00421614
															101.665	0.3861	0.00455598
															101.721	0.4652	0.00548936
															101.776	0.1661	0.00195998
															101.832	0.2455	0.0028969
															101.887	0.358	0.0042244
															101.943	0.4684	0.00552712
															101.999	0.393	0.0046374
															102.054	0.4697	0.00554246
															102.11	0.5172	0.00610296
															102.165	0.5359	0.00632362
															102.221	0.5252	0.00619736
															102.276	0.4036	0.00476248
															102.332	0.5218	0.00615724
															102.387	0.5186	0.00611948
															102.443	0.4061	0.00479198
															102.499	0.4945	0.0058351
															102.554	0.3834	0.00452412
															102.61	0.4625	0.0054575
															102.665	0.4398	0.00518964
															102.721	0.4181	0.00493358
															102.776	0.5874	0.00693132
															102.832	0.5748	0.00678264
															102.887	0.5041	0.00594838
															102.943	0.5512	0.00650416
															102.999	0.6698	0.00790364
															103.054	0.5134	0.00605812
															103.11	0.6497	0.00766646
															103.165	0.5969	0.00704342
															103.221	0.5596	0.00660328
															103.276	0.4409	0.00520262
															103.332	0.5288	0.00623984
															103.387	0.4943	0.00583274
															103.443	0.5018	0.00592124
															103.499	0.4179	0.00493122
															103.554	0.5322	0.00627996
															103.61	0.5503	0.00649354
															103.665	0.3637	0.00429166
															103.721	0.4681	0.00552358
															103.776	0.472	0.0055696
															103.832	0.5384	0.00635312
															103.887	0.4298	0.00507164
															103.943	0.55	0.00649
															103.999	0.5741	0.00677438
															104.054	0.5227	0.00616786
															104.11	0.5592	0.00659856
															104.165	0.5277	0.00622686
															104.221	0.5615	0.0066257
															104.276	0.481	0.0056758
															104.332	0.5553	0.00655254
															104.387	0.4848	0.00572064
															104.443	0.5888	0.00694784
															104.499	0.4065	0.0047967
															104.554	0.5489	0.00647702
															104.61	0.5081	0.00599558
															104.665	0.5245	0.0061891
															104.721	0.5814	0.00686052
															104.776	0.4686	0.00552948
															104.832	0.5256	0.00620208
															104.887	0.4659	0.00549762
															104.943	0.3421	0.00403678
															104.999	0.4593	0.00541974
															105.054	0.5336	0.00629648
															105.11	0.4812	0.00567816
															105.165	0.4966	0.00585988
															105.221	0.5311	0.00626698
															105.276	0.5118	0.00603924
															105.332	0.5759	0.00679562
															105.387	0.57	0.006726
															105.443	0.6123	0.00722514
															105.499	0.6499	0.00766882
															105.554	0.5434	0.00641212
															105.61	0.6882	0.00812076
															105.665	0.6253	0.00737854
															105.721	0.6721	0.00793078
															105.776	0.6216	0.00733488
															105.832	0.6337	0.00747766
															105.887	0.589	0.0069502
															105.943	0.6976	0.00823168
															105.999	0.5768	0.00680624
															106.054	0.5427	0.00640386
															106.11	0.5249	0.00619382
															106.165	0.581	0.0068558
															106.221	0.598	0.0070564
															106.276	0.7108	0.00838744
															106.332	0.5762	0.00679916
															106.387	0.6758	0.00797444
															106.443	0.613	0.0072334
															106.499	0.6737	0.00794966
															106.554	0.6548	0.00772664
															106.61	0.5821	0.00686878
															106.665	0.6172	0.00728296
															106.721	0.6581	0.00776558
															106.776	0.7585	0.0089503
															106.832	0.7089	0.00836502
															106.887	0.7901	0.00932318
															106.943	0.7866	0.00928188
															106.999	0.6656	0.00785408
															107.054	0.6563	0.00774434
															107.11	0.6231	0.00735258
															107.165	0.6696	0.00790128
															107.221	0.7445	0.0087851
															107.276	0.6588	0.00777384
															107.332	0.7002	0.00826236
															107.387	0.7538	0.00889484
															107.443	0.7811	0.00921698
															107.499	0.7407	0.00874026
															107.554	0.8668	0.0102282
															107.61	0.8472	0.00999696
															107.665	0.6836	0.00806648
															107.721	0.8105	0.0095639
															107.776	0.8009	0.00945062
															107.832	0.8381	0.00988958
															107.887	0.8325	0.0098235
															107.943	0.7533	0.00888894
															107.999	0.9286	0.0109575
															108.054	0.876	0.0103368
															108.11	0.9433	0.0111309
															108.165	0.8496	0.0100253
															108.221	0.9305	0.0109799
															108.276	0.7502	0.00885236
															108.332	0.8707	0.0102743
															108.387	0.9098	0.0107356
															108.443	0.9524	0.0112383
															108.499	0.8803	0.0103875
															108.554	1.0856	0.0128101
															108.61	1.0049	0.0118578
															108.665	1.0522	0.012416
															108.721	1.107	0.0130626
															108.776	1.0393	0.0122637
															108.832	1.0761	0.012698
															108.887	1.0793	0.0127357
															108.943	1.1657	0.0137553
															108.999	1.1394	0.0134449
															109.054	1.0743	0.0126767
															109.11	1.1629	0.0137222
															109.165	1.1514	0.0135865
															109.221	1.2906	0.0152291
															109.276	1.0452	0.0123334
															109.332	1.0838	0.0127888
															109.387	1.0927	0.0128939
															109.443	1.1685	0.0137883
															109.499	1.054	0.0124372
															109.554	1.2216	0.0144149
															109.61	1.2762	0.0150592
															109.665	1.2767	0.0150651
															109.721	1.2242	0.0144456
															109.776	1.1971	0.0141258
															109.832	1.1235	0.0132573
															109.887	1.4212	0.0167702
															109.943	1.3649	0.0161058
															109.999	1.2994	0.0153329
															110.054	1.2218	0.0144172
															110.11	1.3096	0.0154533
															110.165	1.3264	0.0156515
															110.221	1.1951	0.0141022
															110.276	1.3351	0.0157542
															110.332	1.4057	0.0165873
															110.387	1.5092	0.0178086
															110.443	1.5249	0.0179938
															110.499	1.4954	0.0176457
															110.554	1.3567	0.0160091
															110.61	1.4678	0.01732
															110.665	1.443	0.0170274
															110.721	1.5949	0.0188198
															110.776	1.5466	0.0182499
															110.832	1.5137	0.0178617
															110.887	1.4879	0.0175572
															110.943	1.5158	0.0178864
															110.999	1.5376	0.0181437
															111.054	1.6244	0.0191679
															111.11	1.563	0.0184434
															111.165	1.6128	0.019031
[truncated: 736 more rows]

## Sheet: O2 supply guided by biomass
Ferm. Samples (internal # 19)					Manually adjusted gasflow						Hcp 1.18 mM/atm
Time [h]	OD600	STD OD600	gcdw [g/L]		Time [h]	CO2 [NmL/min]	H2 [NmL/min]	O2 [NmL/min]	Total [NmL/min]	pO2 [atm]	O* at t [mM]
0	1.35	0.057735	0.33156		0	32	361	7	400	0.0175	0.02065
4.46667	1.93333	0.057735	0.474827		75.0833	32	361	7	400	0.0175	0.02065
19.3333	1.66667	0.057735	0.409333		75.0833	32	355	13	400	0.0325	0.03835
24.75	1.7	0	0.41752		102.167	32	355	13	400	0.0325	0.03835
43.8333	1.7	0	0.41752		102.167	32	307	61	400	0.1525	0.17995
66.8333	1.7	0	0.41752		124.5	32	307	61	400	0.1525	0.17995
75.0833	2.05	0.057735	0.50348		124.5	32	298	70	400	0.175	0.2065
102.167	11	0.408248	2.7016		149.917	32	298	70	400	0.175	0.2065
124.5	19.5	0.57735	4.7892		149.917	32	320	48	400	0.12	0.1416
139.667	24.5	1.29099	6.0172		163.5	32	320	48	400	0.12	0.1416
146.083	24.25	0.5	5.9558
149.917	25.25	0.957427	6.2014
163.5	26.5	0.57735	6.5084

## Sheet: const. low O2
Ferm. Samples (internal # 28)					Manually adjusted gasflow						Hcp 1.18 mM/atm
Time [h]	OD600	STD OD600	gcdw [g/L]		Time [h]	CO2 [NmL/min]	H2 [NmL/min]	O2 [NmL/min]	Total [NmL/min]	pO2 [atm]	O* at t [mM]
0	0.29	0	0.071224		all time	32	361	7	400	0.0175	0.02065
14.9167	2	0	0.4912
48.3333	2.6	0.0816497	0.63856
62.5833	2.63333	0.0957427	0.646747
71.3333	2.66667	0.05	0.654933
86.3	2.85	0.057735	0.69996
97	3	0.0816497	0.7368
110.667	3.3	0.0816497	0.81048
120.767	3.75	0.1	0.921
137.667	4.1	0.11547	1.00696
147.633	4.55	0.191485	1.11748
158.5	5.05	0.1	1.24028

## Sheet: const. high O2
Ferm. Samples (internal # 8)				Manually adjusted gasflow						Hcp 1.18 mM/atm
Time [h]	OD600	gcdw [g/L]		Time [h]	CO2 [NmL/min]	H2 [NmL/min]	O2 [NmL/min]	Total [NmL/min]	pO2 [atm]	O* at t [mM]
0	0.9	0.22104		0	10	85	5	100	0.05	0.059
22.5	1.3	0.31928		90	10	85	5	100	0.05	0.059
26.25	1.35	0.33156
46.3333	1.3	0.31928

## Sheet: µmax
Experiment
Gas cultivation 1			Gas cultivation 4			Gas cultivation 3			Gas cultivation 2			W.out Sensor			Constant Gasflow
Time [h]	OD600	LN(OD600)	Time [h]	OD600	LN(OD600)	Time [h]	OD600	LN(OD600)	Time [h]	OD600	LN(OD600)	Time [h]	OD600	LN(OD600)	Time [h]	OD600	LN(OD600)
0	0.075	-2.59027	0	0.155	-1.86433	0	0.03	-3.50656	0	0.65	-0.430783	0	1.35	0.300105	0	0.29	-1.23787
23.85	2.73333	1.00552	3.66667	0.96	-0.040822	6.58333	1.86667	0.624154	4.5	1.06667	0.0645385	4.46667	1.93333	0.659246	14.9167	2	0.693147
29.1167	3.06667	1.12059	18.5833	3.075	1.1233	23.75	2.8	1.02962	23.75	2.23333	0.803495	19.3333	1.66667	0.510826	48.3333	2.6	0.955511
47.5833	4	1.38629	22	3.15	1.1474	30	2.8	1.02962	28.6667	2.23333	0.803495	24.75	1.7	0.530628	62.5833	2.63333	0.96825
50.3333	4.8	1.56862	26.75	3.05	1.11514	47.25	3.2	1.16315	47.5	2.66667	0.980829	43.8333	1.7	0.530628	71.3333	2.66667	0.980829
52.9833	6	1.79176	42.75	4.5	1.50408	53.5833	3.4	1.22378	52.4167	3.53333	1.26224	66.8333	1.7	0.530628	86.3	2.85	1.04732
71.9833	22.3333	3.10608	45	6.75	1.90954	60.15	4.8	1.56862	71.5	22.6667	3.1209	75.0833	2.05	0.71784	97	3	1.09861
76.8333	27.3333	3.30811	51	12.5	2.52573	70	13.3333	2.59027	76	27.6667	3.32023	102.167	11	2.3979	110.667	3.3	1.19392
101.75	40	3.68888	55.4167	17.5	2.8622	76	20.3333	3.01226	90	35	3.55535	124.5	19.5	2.97041	120.767	3.75	1.32176
106.617	43	3.7612	66.4167	28.5	3.3499	83.5833	26	3.2581				139.667	24.5	3.19867	137.667	4.1	1.41099
122.667	44	3.78419	78.25	38	3.63759	94.6667	34	3.52636				146.083	24.25	3.18842
			90.75	44.5	3.79549	102.25	40	3.68888				149.917	25.25	3.22883
			99	47	3.85015	125.25	50	3.91202				163.5	26.5	3.27714
			116	50	3.91202	153.167	58	4.06044
			123	53.5	3.97968	165.333	52	3.95124
			136.083	54.5	3.9982
			146.583	55	4.00733
